# Supplementary material for: Lytic transglycosylases mitigate periplasmic crowding by degrading soluble cell wall turnover products
Source: bioRxiv preprint, doi:10.1101/2021.07.27.453986, version 3 (2021-12-08)
Supplement: Fig3 Source Data 1 [file 453986_file03.xlsx]

## Sheet: WTRep1
	Media	LB	LB+IPTG	LB0N	LB0N+IPTG	LB	LB	LB	LB	LB	LB	LB	LB	LB	LB	LB+IPTG	LB+IPTG	LB+IPTG	LB+IPTG	LB+IPTG	LB+IPTG	LB+IPTG	LB+IPTG	LB+IPTG	LB+IPTG	LB	LB	LB	LB	LB	LB	LB	LB	LB	LB	LB+IPTG	LB+IPTG	LB+IPTG	LB+IPTG	LB+IPTG	LB+IPTG	LB+IPTG	LB+IPTG	LB+IPTG	LB+IPTG	LB0N	LB0N	LB0N	LB0N
	Dilution Factor	Blank	Blank	Blank	Blank	0.001	0.001	0.001	0.001	0.001	0.001	0.001	0.001	0.001	0.001	0.001	0.001	0.001	0.001	0.001	0.001	0.001	0.001	0.001	0.001	1e-05	1e-05	1e-05	1e-05	1e-05	1e-05	1e-05	1e-05	1e-05	1e-05	1e-05	1e-05	1e-05	1e-05	1e-05	1e-05	1e-05	1e-05	1e-05	1e-05	0.001	0.001	0.001	0.001
	Background	N/A	N/A	N/A	N/A	WT	WT	WT	WT	WT	WT	WT	WT	WT	WT	WT	WT	WT	WT	WT	WT	WT	WT	WT	WT	WT	WT	WT	WT	WT	WT	WT	WT	WT	WT	WT	WT	WT	WT	WT	WT	WT	WT	WT	WT	WT	WT	WT	WT
	Ptac	N/A	N/A	N/A	N/A	empty	mltA	mltB	mltC	mltD	mltF	slt70	EcmltE	mltG	rlpA	empty	mltA	mltB	mltC	mltD	mltF	slt70	EcmltE	mltG	rlpA	empty	mltA	mltB	mltC	mltD	mltF	slt70	EcmltE	mltG	rlpA	empty	mltA	mltB	mltC	mltD	mltF	slt70	EcmltE	mltG	rlpA	empty	mltA	mltB	mltC
	hr:min:sec
	00:01:05	0.075	0.072	0.075	0.074	0.071	0.071	0.072	0.07	0.071	0.072	0.072	0.071	0.07	0.071	0.069	0.069	0.07	0.068	0.07	0.069	0.068	0.069	0.069	0.069	0.071	0.068	0.07	0.067	0.066	0.066	0.066	0.067	0.068	0.068	0.069	0.067	0.067	0.068	0.067	0.068	0.067	0.067	0.068	0.07	0.084	0.068	0.068	0.066
	00:05:06	0.072	0.07	0.071	0.07	0.071	0.07	0.071	0.069	0.07	0.07	0.07	0.069	0.069	0.069	0.068	0.068	0.07	0.067	0.069	0.068	0.067	0.067	0.068	0.068	0.07	0.068	0.069	0.066	0.065	0.066	0.065	0.066	0.067	0.067	0.068	0.066	0.066	0.067	0.067	0.068	0.067	0.067	0.067	0.069	0.083	0.067	0.067	0.065
	00:10:06	0.071	0.069	0.071	0.07	0.07	0.07	0.071	0.069	0.07	0.07	0.07	0.069	0.068	0.069	0.068	0.067	0.069	0.067	0.069	0.068	0.067	0.067	0.067	0.068	0.069	0.067	0.068	0.065	0.065	0.065	0.065	0.065	0.066	0.067	0.067	0.066	0.065	0.067	0.066	0.068	0.067	0.067	0.067	0.068	0.082	0.067	0.067	0.065
	00:15:06	0.071	0.069	0.071	0.07	0.071	0.07	0.071	0.069	0.071	0.07	0.07	0.069	0.068	0.069	0.068	0.068	0.07	0.067	0.069	0.068	0.067	0.068	0.068	0.068	0.07	0.067	0.068	0.065	0.065	0.065	0.065	0.065	0.066	0.067	0.067	0.066	0.065	0.066	0.066	0.068	0.067	0.067	0.067	0.068	0.083	0.066	0.067	0.065
	00:20:06	0.074	0.071	0.073	0.072	0.072	0.072	0.072	0.07	0.073	0.072	0.071	0.072	0.07	0.071	0.069	0.069	0.071	0.068	0.07	0.069	0.068	0.069	0.069	0.07	0.071	0.068	0.069	0.066	0.065	0.066	0.065	0.066	0.067	0.068	0.068	0.067	0.066	0.067	0.066	0.068	0.067	0.067	0.067	0.07	0.083	0.068	0.067	0.066
	00:25:06	0.071	0.07	0.07	0.068	0.072	0.071	0.072	0.07	0.072	0.071	0.071	0.071	0.069	0.07	0.069	0.069	0.071	0.068	0.07	0.069	0.068	0.069	0.068	0.069	0.07	0.067	0.068	0.065	0.065	0.065	0.065	0.065	0.066	0.067	0.067	0.066	0.065	0.066	0.066	0.068	0.067	0.067	0.067	0.069	0.082	0.067	0.067	0.065
	00:30:06	0.071	0.07	0.07	0.068	0.072	0.072	0.072	0.071	0.073	0.072	0.071	0.072	0.07	0.07	0.069	0.069	0.071	0.069	0.071	0.07	0.069	0.069	0.069	0.07	0.07	0.067	0.068	0.065	0.065	0.065	0.065	0.065	0.066	0.067	0.067	0.066	0.065	0.066	0.066	0.067	0.067	0.067	0.067	0.069	0.082	0.067	0.067	0.065
	00:35:06	0.071	0.07	0.071	0.068	0.073	0.072	0.073	0.072	0.074	0.073	0.072	0.073	0.07	0.071	0.07	0.07	0.072	0.07	0.072	0.071	0.069	0.07	0.069	0.071	0.07	0.067	0.068	0.065	0.065	0.065	0.065	0.065	0.067	0.067	0.067	0.066	0.065	0.066	0.066	0.068	0.067	0.067	0.067	0.07	0.082	0.067	0.067	0.065
	00:40:06	0.072	0.071	0.072	0.069	0.074	0.074	0.075	0.074	0.076	0.074	0.073	0.075	0.072	0.073	0.071	0.071	0.073	0.071	0.073	0.072	0.071	0.072	0.07	0.072	0.071	0.068	0.068	0.065	0.065	0.066	0.065	0.066	0.067	0.068	0.068	0.066	0.066	0.067	0.066	0.068	0.067	0.067	0.067	0.07	0.082	0.067	0.067	0.066
	00:45:06	0.071	0.07	0.071	0.069	0.075	0.075	0.075	0.074	0.077	0.075	0.074	0.075	0.072	0.073	0.072	0.071	0.074	0.072	0.074	0.073	0.072	0.073	0.071	0.073	0.07	0.068	0.068	0.065	0.065	0.065	0.065	0.065	0.067	0.067	0.068	0.066	0.065	0.067	0.066	0.068	0.067	0.067	0.067	0.069	0.083	0.067	0.067	0.065
	00:50:06	0.071	0.07	0.071	0.069	0.076	0.076	0.077	0.076	0.079	0.077	0.075	0.077	0.073	0.074	0.074	0.073	0.076	0.074	0.076	0.075	0.073	0.075	0.073	0.075	0.071	0.068	0.068	0.065	0.065	0.066	0.065	0.066	0.067	0.068	0.068	0.066	0.066	0.067	0.066	0.068	0.067	0.067	0.067	0.069	0.083	0.067	0.067	0.066
	00:55:06	0.072	0.071	0.072	0.07	0.079	0.079	0.079	0.079	0.083	0.079	0.077	0.08	0.075	0.076	0.075	0.075	0.077	0.076	0.078	0.078	0.075	0.077	0.074	0.077	0.071	0.068	0.068	0.066	0.065	0.066	0.065	0.066	0.067	0.068	0.068	0.067	0.066	0.067	0.066	0.068	0.067	0.067	0.068	0.069	0.082	0.068	0.068	0.066
	01:00:06	0.072	0.071	0.072	0.07	0.081	0.081	0.08	0.081	0.085	0.081	0.079	0.083	0.077	0.078	0.077	0.076	0.079	0.078	0.081	0.08	0.077	0.079	0.076	0.079	0.071	0.068	0.069	0.066	0.065	0.066	0.065	0.066	0.068	0.069	0.068	0.067	0.066	0.067	0.066	0.068	0.067	0.067	0.067	0.069	0.082	0.068	0.068	0.066
	01:05:06	0.071	0.07	0.071	0.069	0.083	0.083	0.083	0.084	0.089	0.084	0.081	0.086	0.079	0.08	0.08	0.079	0.082	0.081	0.083	0.083	0.079	0.082	0.078	0.081	0.071	0.068	0.068	0.065	0.065	0.066	0.065	0.066	0.067	0.068	0.068	0.066	0.065	0.067	0.066	0.068	0.067	0.067	0.067	0.069	0.083	0.068	0.067	0.066
	01:10:06	0.072	0.071	0.071	0.069	0.086	0.087	0.086	0.087	0.094	0.088	0.084	0.09	0.081	0.083	0.083	0.081	0.084	0.085	0.087	0.088	0.083	0.086	0.081	0.085	0.071	0.068	0.069	0.066	0.066	0.066	0.065	0.066	0.068	0.068	0.068	0.067	0.066	0.067	0.066	0.068	0.067	0.067	0.068	0.07	0.084	0.068	0.068	0.067
	01:15:06	0.071	0.071	0.071	0.069	0.09	0.091	0.089	0.092	0.099	0.092	0.087	0.094	0.085	0.086	0.086	0.085	0.088	0.089	0.091	0.092	0.086	0.09	0.084	0.088	0.071	0.068	0.068	0.065	0.065	0.066	0.065	0.066	0.067	0.068	0.068	0.067	0.066	0.067	0.066	0.068	0.067	0.067	0.068	0.069	0.084	0.068	0.068	0.067
	01:20:06	0.072	0.071	0.071	0.069	0.094	0.097	0.094	0.099	0.107	0.099	0.092	0.101	0.089	0.091	0.091	0.09	0.092	0.095	0.097	0.098	0.091	0.096	0.088	0.092	0.071	0.069	0.069	0.066	0.066	0.066	0.066	0.066	0.068	0.069	0.069	0.067	0.066	0.067	0.067	0.068	0.067	0.067	0.068	0.07	0.084	0.069	0.068	0.067
	01:25:06	0.072	0.071	0.071	0.069	0.101	0.103	0.099	0.105	0.115	0.105	0.097	0.108	0.093	0.096	0.096	0.095	0.098	0.101	0.103	0.106	0.097	0.103	0.094	0.099	0.071	0.069	0.069	0.066	0.066	0.066	0.066	0.066	0.068	0.069	0.069	0.067	0.066	0.067	0.066	0.068	0.067	0.067	0.068	0.07	0.085	0.069	0.068	0.067
	01:30:06	0.072	0.071	0.071	0.069	0.107	0.111	0.106	0.113	0.125	0.113	0.103	0.117	0.099	0.101	0.103	0.101	0.104	0.11	0.111	0.115	0.103	0.111	0.099	0.105	0.071	0.069	0.069	0.066	0.066	0.066	0.065	0.066	0.068	0.069	0.068	0.067	0.066	0.067	0.066	0.068	0.067	0.067	0.068	0.07	0.085	0.069	0.069	0.067
	01:35:06	0.072	0.071	0.071	0.07	0.116	0.121	0.114	0.125	0.14	0.125	0.111	0.129	0.107	0.109	0.111	0.109	0.112	0.121	0.122	0.128	0.112	0.122	0.108	0.114	0.071	0.069	0.069	0.066	0.066	0.066	0.066	0.066	0.068	0.069	0.069	0.067	0.066	0.067	0.067	0.069	0.067	0.068	0.068	0.07	0.086	0.07	0.069	0.068
	01:40:06	0.073	0.072	0.073	0.071	0.129	0.134	0.125	0.14	0.158	0.139	0.121	0.143	0.116	0.119	0.122	0.121	0.122	0.134	0.135	0.143	0.124	0.135	0.118	0.126	0.071	0.069	0.07	0.067	0.066	0.067	0.066	0.067	0.068	0.069	0.069	0.068	0.067	0.068	0.067	0.069	0.068	0.068	0.068	0.07	0.085	0.071	0.07	0.068
	01:45:06	0.076	0.073	0.073	0.071	0.143	0.151	0.14	0.16	0.179	0.159	0.136	0.164	0.129	0.133	0.137	0.135	0.138	0.154	0.153	0.164	0.138	0.153	0.131	0.139	0.072	0.07	0.07	0.067	0.067	0.067	0.066	0.067	0.069	0.07	0.07	0.068	0.067	0.068	0.067	0.069	0.068	0.068	0.069	0.071	0.087	0.072	0.07	0.069
	01:50:06	0.072	0.071	0.071	0.069	0.16	0.169	0.156	0.18	0.2	0.179	0.15	0.18	0.141	0.145	0.152	0.151	0.153	0.175	0.173	0.186	0.154	0.172	0.145	0.155	0.071	0.069	0.069	0.066	0.066	0.066	0.066	0.067	0.068	0.069	0.069	0.067	0.066	0.067	0.067	0.069	0.068	0.068	0.068	0.07	0.086	0.071	0.07	0.069
	01:55:06	0.072	0.071	0.071	0.07	0.183	0.194	0.177	0.203	0.217	0.202	0.171	0.196	0.159	0.165	0.173	0.171	0.174	0.198	0.198	0.205	0.178	0.19	0.165	0.178	0.071	0.069	0.07	0.067	0.066	0.067	0.066	0.067	0.068	0.069	0.069	0.068	0.067	0.068	0.067	0.069	0.068	0.068	0.069	0.07	0.087	0.072	0.071	0.07
	02:00:06	0.072	0.071	0.071	0.069	0.202	0.212	0.198	0.221	0.238	0.219	0.191	0.209	0.183	0.189	0.195	0.194	0.195	0.209	0.207	0.22	0.199	0.208	0.191	0.198	0.071	0.069	0.07	0.067	0.066	0.067	0.066	0.067	0.068	0.069	0.069	0.068	0.067	0.068	0.067	0.069	0.068	0.068	0.068	0.07	0.088	0.073	0.071	0.07
	02:05:06	0.072	0.071	0.071	0.07	0.227	0.228	0.212	0.245	0.268	0.246	0.205	0.235	0.202	0.199	0.208	0.21	0.206	0.229	0.234	0.246	0.209	0.224	0.205	0.215	0.072	0.07	0.07	0.067	0.066	0.067	0.066	0.067	0.069	0.069	0.07	0.068	0.067	0.068	0.067	0.069	0.068	0.069	0.069	0.07	0.088	0.074	0.071	0.07
	02:10:06	0.072	0.071	0.071	0.07	0.24	0.255	0.235	0.257	0.267	0.252	0.227	0.238	0.222	0.222	0.232	0.228	0.226	0.242	0.241	0.253	0.231	0.23	0.223	0.223	0.072	0.07	0.071	0.068	0.067	0.068	0.067	0.068	0.069	0.07	0.07	0.068	0.068	0.069	0.068	0.07	0.068	0.069	0.069	0.071	0.09	0.075	0.072	0.071
	02:15:06	0.073	0.071	0.071	0.07	0.273	0.29	0.25	0.273	0.288	0.27	0.239	0.258	0.237	0.241	0.253	0.242	0.243	0.266	0.263	0.298	0.245	0.256	0.244	0.25	0.072	0.071	0.071	0.068	0.067	0.068	0.067	0.068	0.069	0.07	0.07	0.069	0.068	0.069	0.068	0.07	0.069	0.07	0.07	0.071	0.09	0.076	0.073	0.072
	02:20:06	0.073	0.071	0.072	0.07	0.282	0.305	0.282	0.309	0.331	0.308	0.273	0.302	0.27	0.277	0.276	0.275	0.27	0.295	0.302	0.319	0.283	0.296	0.282	0.289	0.073	0.071	0.071	0.068	0.068	0.069	0.067	0.069	0.07	0.07	0.071	0.069	0.068	0.07	0.068	0.071	0.069	0.07	0.07	0.071	0.091	0.077	0.074	0.073
	02:25:06	0.072	0.071	0.071	0.07	0.32	0.319	0.298	0.329	0.351	0.331	0.289	0.319	0.281	0.288	0.295	0.294	0.29	0.318	0.326	0.34	0.302	0.313	0.296	0.305	0.073	0.072	0.072	0.069	0.068	0.069	0.068	0.07	0.07	0.071	0.071	0.07	0.069	0.071	0.069	0.072	0.069	0.071	0.071	0.072	0.093	0.079	0.075	0.074
	02:30:06	0.072	0.071	0.071	0.07	0.338	0.349	0.33	0.359	0.367	0.362	0.323	0.354	0.314	0.319	0.326	0.326	0.326	0.355	0.354	0.367	0.334	0.351	0.331	0.337	0.074	0.072	0.073	0.07	0.069	0.07	0.068	0.07	0.071	0.071	0.072	0.071	0.07	0.072	0.07	0.072	0.07	0.072	0.071	0.072	0.094	0.08	0.075	0.075
	02:35:06	0.073	0.071	0.071	0.07	0.35	0.372	0.352	0.365	0.377	0.365	0.345	0.368	0.341	0.345	0.347	0.346	0.347	0.357	0.358	0.369	0.349	0.374	0.356	0.364	0.074	0.073	0.074	0.071	0.069	0.071	0.068	0.071	0.071	0.072	0.073	0.071	0.07	0.072	0.07	0.073	0.07	0.073	0.072	0.073	0.095	0.082	0.076	0.076
	02:40:06	0.073	0.072	0.072	0.07	0.369	0.371	0.347	0.364	0.379	0.364	0.338	0.372	0.351	0.358	0.347	0.355	0.35	0.365	0.361	0.377	0.351	0.372	0.361	0.359	0.076	0.074	0.075	0.072	0.07	0.072	0.069	0.072	0.072	0.073	0.074	0.072	0.072	0.074	0.072	0.074	0.071	0.074	0.073	0.074	0.097	0.084	0.078	0.078
	02:45:06	0.073	0.072	0.071	0.07	0.391	0.397	0.359	0.389	0.375	0.385	0.352	0.384	0.364	0.362	0.356	0.359	0.354	0.378	0.384	0.382	0.362	0.385	0.375	0.371	0.076	0.075	0.076	0.073	0.071	0.074	0.07	0.074	0.073	0.074	0.075	0.074	0.073	0.075	0.073	0.076	0.072	0.076	0.074	0.075	0.099	0.086	0.08	0.08
	02:50:06	0.073	0.072	0.072	0.07	0.389	0.401	0.398	0.383	0.379	0.391	0.398	0.422	0.402	0.415	0.389	0.395	0.388	0.381	0.384	0.388	0.405	0.433	0.414	0.412	0.078	0.077	0.078	0.074	0.072	0.075	0.071	0.076	0.074	0.075	0.076	0.076	0.075	0.077	0.074	0.077	0.073	0.078	0.075	0.076	0.101	0.089	0.081	0.082
	02:55:06	0.073	0.072	0.072	0.07	0.382	0.394	0.387	0.387	0.385	0.386	0.381	0.398	0.425	0.409	0.388	0.393	0.386	0.387	0.386	0.398	0.387	0.436	0.436	0.396	0.08	0.079	0.08	0.077	0.074	0.078	0.072	0.078	0.076	0.076	0.078	0.077	0.077	0.079	0.076	0.08	0.074	0.081	0.077	0.078	0.104	0.092	0.083	0.084
	03:00:06	0.073	0.072	0.072	0.07	0.384	0.393	0.382	0.389	0.394	0.391	0.371	0.406	0.404	0.391	0.38	0.383	0.379	0.386	0.389	0.4	0.382	0.44	0.414	0.388	0.082	0.081	0.083	0.079	0.077	0.08	0.074	0.081	0.078	0.078	0.08	0.08	0.08	0.082	0.079	0.082	0.076	0.083	0.079	0.08	0.107	0.096	0.086	0.087
	03:05:06	0.073	0.072	0.072	0.07	0.382	0.396	0.39	0.4	0.404	0.402	0.382	0.415	0.404	0.394	0.383	0.393	0.39	0.399	0.399	0.409	0.393	0.431	0.415	0.398	0.085	0.084	0.086	0.082	0.079	0.083	0.076	0.084	0.08	0.08	0.083	0.083	0.082	0.086	0.082	0.086	0.078	0.087	0.082	0.082	0.11	0.1	0.088	0.09
	03:10:06	0.075	0.073	0.073	0.071	0.391	0.408	0.393	0.402	0.42	0.405	0.381	0.408	0.402	0.393	0.389	0.394	0.39	0.401	0.399	0.412	0.392	0.426	0.408	0.394	0.088	0.088	0.09	0.086	0.082	0.088	0.078	0.089	0.083	0.083	0.087	0.087	0.087	0.09	0.085	0.09	0.081	0.092	0.085	0.085	0.113	0.105	0.091	0.094
	03:15:06	0.075	0.073	0.074	0.071	0.387	0.413	0.4	0.415	0.412	0.417	0.392	0.421	0.408	0.402	0.395	0.401	0.398	0.412	0.42	0.461	0.396	0.427	0.411	0.398	0.093	0.093	0.096	0.091	0.086	0.093	0.081	0.094	0.086	0.086	0.091	0.092	0.092	0.096	0.09	0.096	0.084	0.097	0.089	0.089	0.118	0.11	0.095	0.098
	03:20:06	0.073	0.072	0.072	0.07	0.41	0.417	0.403	0.416	0.415	0.415	0.4	0.422	0.406	0.401	0.416	0.405	0.412	0.416	0.419	0.429	0.405	0.437	0.418	0.449	0.098	0.098	0.101	0.096	0.09	0.098	0.083	0.099	0.09	0.09	0.095	0.097	0.097	0.102	0.094	0.101	0.087	0.104	0.093	0.093	0.123	0.116	0.098	0.102
	03:25:06	0.073	0.072	0.072	0.071	0.418	0.427	0.412	0.419	0.414	0.421	0.404	0.42	0.419	0.402	0.407	0.424	0.41	0.419	0.417	0.43	0.416	0.44	0.431	0.413	0.105	0.105	0.11	0.104	0.096	0.107	0.088	0.108	0.095	0.095	0.103	0.105	0.106	0.111	0.102	0.11	0.092	0.114	0.1	0.099	0.128	0.123	0.103	0.107
	03:30:06	0.073	0.072	0.072	0.07	0.409	0.429	0.412	0.425	0.427	0.42	0.404	0.422	0.417	0.418	0.409	0.417	0.416	0.426	0.419	0.433	0.411	0.439	0.43	0.413	0.113	0.114	0.119	0.113	0.103	0.117	0.093	0.117	0.101	0.1	0.11	0.113	0.115	0.122	0.11	0.12	0.097	0.124	0.107	0.106	0.134	0.131	0.107	0.113
	03:35:06	0.075	0.073	0.074	0.071	0.427	0.435	0.42	0.435	0.435	0.436	0.41	0.431	0.426	0.412	0.412	0.427	0.424	0.429	0.428	0.443	0.426	0.449	0.433	0.418	0.124	0.125	0.132	0.125	0.112	0.13	0.101	0.131	0.11	0.11	0.122	0.125	0.127	0.136	0.122	0.133	0.105	0.139	0.118	0.117	0.14	0.139	0.113	0.119
	03:40:05	0.075	0.073	0.074	0.071	0.424	0.439	0.425	0.441	0.444	0.442	0.419	0.443	0.432	0.425	0.422	0.433	0.433	0.441	0.44	0.454	0.43	0.458	0.443	0.426	0.136	0.139	0.148	0.14	0.125	0.147	0.11	0.147	0.121	0.119	0.135	0.14	0.143	0.154	0.136	0.15	0.115	0.157	0.129	0.128	0.149	0.149	0.12	0.127
	03:45:06	0.075	0.074	0.074	0.072	0.43	0.441	0.428	0.443	0.449	0.443	0.417	0.444	0.431	0.425	0.424	0.437	0.435	0.446	0.443	0.456	0.436	0.462	0.446	0.425	0.153	0.157	0.166	0.157	0.138	0.165	0.12	0.166	0.134	0.132	0.152	0.159	0.162	0.175	0.154	0.171	0.127	0.175	0.146	0.143	0.157	0.16	0.127	0.135
	03:50:06	0.074	0.072	0.072	0.071	0.437	0.449	0.434	0.444	0.449	0.449	0.421	0.451	0.433	0.43	0.423	0.436	0.435	0.45	0.446	0.46	0.439	0.464	0.447	0.428	0.172	0.177	0.187	0.176	0.157	0.183	0.134	0.18	0.149	0.146	0.17	0.177	0.179	0.192	0.174	0.19	0.142	0.185	0.164	0.159	0.167	0.172	0.134	0.144
	03:55:06	0.074	0.072	0.072	0.07	0.439	0.448	0.432	0.457	0.459	0.455	0.427	0.462	0.445	0.436	0.429	0.438	0.448	0.46	0.457	0.477	0.447	0.47	0.457	0.438	0.188	0.195	0.201	0.191	0.177	0.196	0.151	0.194	0.169	0.165	0.189	0.195	0.193	0.2	0.187	0.199	0.16	0.202	0.185	0.176	0.177	0.184	0.144	0.153
	04:00:06	0.073	0.072	0.072	0.07	0.445	0.457	0.439	0.46	0.463	0.458	0.434	0.458	0.441	0.437	0.436	0.452	0.458	0.473	0.467	0.489	0.462	0.483	0.466	0.441	0.205	0.209	0.217	0.204	0.194	0.216	0.174	0.207	0.188	0.184	0.204	0.207	0.208	0.224	0.202	0.224	0.183	0.218	0.197	0.194	0.189	0.197	0.153	0.165
	04:05:06	0.074	0.072	0.072	0.071	0.448	0.462	0.444	0.466	0.47	0.465	0.437	0.472	0.447	0.442	0.442	0.452	0.46	0.475	0.471	0.491	0.463	0.481	0.466	0.445	0.231	0.231	0.234	0.22	0.204	0.231	0.189	0.225	0.198	0.198	0.227	0.226	0.225	0.238	0.218	0.238	0.195	0.236	0.216	0.213	0.199	0.204	0.164	0.176
	04:10:06	0.073	0.072	0.072	0.071	0.46	0.473	0.453	0.477	0.484	0.475	0.447	0.482	0.463	0.453	0.448	0.468	0.475	0.493	0.485	0.51	0.484	0.501	0.487	0.46	0.244	0.256	0.263	0.253	0.229	0.261	0.196	0.254	0.221	0.22	0.245	0.255	0.256	0.269	0.248	0.27	0.21	0.266	0.242	0.231	0.206	0.213	0.176	0.189
	04:15:06	0.075	0.073	0.074	0.071	0.466	0.477	0.461	0.485	0.491	0.481	0.456	0.488	0.462	0.456	0.457	0.476	0.484	0.501	0.493	0.518	0.492	0.505	0.489	0.463	0.271	0.275	0.287	0.274	0.254	0.288	0.225	0.276	0.245	0.235	0.27	0.277	0.277	0.294	0.269	0.295	0.233	0.288	0.269	0.26	0.215	0.224	0.189	0.196
	04:20:06	0.075	0.074	0.074	0.072	0.471	0.488	0.464	0.495	0.495	0.491	0.458	0.494	0.475	0.466	0.462	0.478	0.489	0.516	0.503	0.533	0.502	0.512	0.497	0.47	0.285	0.296	0.303	0.292	0.267	0.305	0.239	0.293	0.263	0.265	0.291	0.297	0.299	0.314	0.29	0.315	0.254	0.31	0.287	0.277	0.224	0.236	0.196	0.204
	04:25:05	0.073	0.072	0.072	0.071	0.485	0.497	0.472	0.503	0.497	0.495	0.464	0.501	0.483	0.481	0.47	0.486	0.498	0.522	0.507	0.539	0.514	0.519	0.507	0.484	0.305	0.321	0.327	0.315	0.29	0.33	0.259	0.319	0.281	0.28	0.316	0.323	0.325	0.341	0.315	0.342	0.273	0.34	0.312	0.299	0.235	0.248	0.202	0.214
	04:30:06	0.073	0.072	0.072	0.071	0.496	0.504	0.476	0.508	0.508	0.504	0.47	0.513	0.491	0.48	0.479	0.494	0.503	0.533	0.517	0.549	0.521	0.528	0.521	0.497	0.348	0.348	0.352	0.34	0.316	0.354	0.285	0.347	0.316	0.323	0.349	0.349	0.344	0.361	0.344	0.364	0.299	0.362	0.346	0.342	0.246	0.259	0.212	0.224
	04:35:06	0.073	0.072	0.072	0.071	0.501	0.516	0.487	0.515	0.523	0.513	0.48	0.522	0.505	0.491	0.486	0.502	0.507	0.537	0.528	0.554	0.524	0.536	0.532	0.502	0.372	0.379	0.375	0.358	0.343	0.372	0.312	0.373	0.346	0.355	0.369	0.369	0.361	0.372	0.362	0.385	0.33	0.382	0.373	0.361	0.255	0.271	0.224	0.235
	04:40:06	0.074	0.073	0.072	0.071	0.527	0.529	0.499	0.533	0.527	0.529	0.488	0.529	0.515	0.512	0.499	0.519	0.527	0.562	0.542	0.579	0.547	0.55	0.548	0.518	0.388	0.387	0.389	0.374	0.368	0.386	0.341	0.387	0.369	0.379	0.388	0.38	0.375	0.407	0.372	0.399	0.355	0.395	0.388	0.388	0.266	0.279	0.235	0.245
	04:45:06	0.075	0.074	0.074	0.072	0.577	0.569	0.537	0.566	0.549	0.562	0.518	0.541	0.545	0.539	0.531	0.549	0.553	0.583	0.562	0.6	0.57	0.579	0.576	0.548	0.423	0.42	0.406	0.385	0.376	0.393	0.354	0.407	0.377	0.392	0.408	0.398	0.384	0.387	0.393	0.406	0.369	0.41	0.391	0.393	0.273	0.288	0.248	0.258
	04:50:06	0.074	0.073	0.072	0.071	0.543	0.544	0.515	0.531	0.532	0.546	0.502	0.536	0.527	0.519	0.518	0.54	0.541	0.565	0.552	0.586	0.554	0.562	0.565	0.529	0.409	0.393	0.382	0.369	0.376	0.378	0.353	0.403	0.376	0.382	0.4	0.383	0.371	0.378	0.374	0.392	0.368	0.415	0.401	0.39	0.277	0.297	0.258	0.267
	04:55:06	0.078	0.075	0.075	0.072	0.595	0.602	0.555	0.582	0.568	0.584	0.535	0.557	0.579	0.57	0.554	0.576	0.579	0.609	0.586	0.63	0.601	0.605	0.611	0.579	0.412	0.399	0.393	0.375	0.386	0.391	0.392	0.426	0.397	0.417	0.402	0.389	0.383	0.391	0.382	0.407	0.411	0.422	0.41	0.398	0.292	0.311	0.271	0.276
	05:00:06	0.074	0.073	0.072	0.071	0.577	0.593	0.54	0.578	0.567	0.574	0.529	0.551	0.569	0.563	0.55	0.573	0.57	0.609	0.591	0.633	0.602	0.605	0.612	0.576	0.403	0.394	0.389	0.374	0.374	0.381	0.377	0.447	0.379	0.401	0.399	0.381	0.376	0.383	0.371	0.393	0.385	0.408	0.397	0.392	0.299	0.318	0.277	0.281
	05:05:06	0.074	0.073	0.072	0.071	0.576	0.596	0.547	0.577	0.565	0.583	0.526	0.559	0.578	0.572	0.552	0.581	0.579	0.611	0.595	0.636	0.605	0.604	0.622	0.586	0.406	0.402	0.399	0.376	0.379	0.387	0.369	0.414	0.382	0.398	0.404	0.388	0.381	0.389	0.377	0.403	0.382	0.415	0.402	0.388	0.309	0.329	0.287	0.292
	05:10:06	0.074	0.073	0.073	0.071	0.62	0.633	0.575	0.612	0.595	0.615	0.554	0.58	0.619	0.603	0.583	0.613	0.609	0.64	0.621	0.665	0.636	0.633	0.657	0.618	0.41	0.401	0.403	0.387	0.39	0.397	0.379	0.428	0.387	0.398	0.405	0.396	0.391	0.399	0.389	0.41	0.392	0.422	0.404	0.397	0.322	0.341	0.299	0.304
	05:15:06	0.075	0.073	0.073	0.071	0.609	0.629	0.578	0.612	0.591	0.617	0.558	0.582	0.62	0.609	0.583	0.616	0.613	0.648	0.626	0.675	0.646	0.638	0.666	0.624	0.402	0.416	0.427	0.425	0.392	0.439	0.381	0.427	0.388	0.403	0.412	0.424	0.412	0.405	0.422	0.445	0.39	0.427	0.41	0.394	0.332	0.349	0.308	0.314
	05:20:06	0.076	0.074	0.074	0.072	0.665	0.671	0.612	0.647	0.626	0.656	0.588	0.6	0.657	0.644	0.617	0.647	0.65	0.67	0.653	0.7	0.673	0.67	0.694	0.654	0.432	0.429	0.422	0.402	0.402	0.417	0.393	0.445	0.393	0.411	0.423	0.411	0.409	0.416	0.408	0.434	0.407	0.436	0.422	0.414	0.342	0.361	0.32	0.327
	05:25:06	0.075	0.073	0.073	0.071	0.653	0.669	0.608	0.646	0.614	0.647	0.585	0.596	0.663	0.645	0.611	0.652	0.647	0.677	0.66	0.707	0.677	0.677	0.712	0.659	0.428	0.426	0.419	0.402	0.407	0.41	0.394	0.438	0.406	0.421	0.423	0.413	0.409	0.419	0.402	0.427	0.407	0.44	0.43	0.414	0.349	0.367	0.327	0.334
	05:30:06	0.074	0.073	0.072	0.071	0.673	0.694	0.624	0.663	0.636	0.671	0.597	0.607	0.689	0.67	0.636	0.674	0.665	0.692	0.677	0.723	0.693	0.697	0.729	0.68	0.427	0.427	0.423	0.409	0.412	0.421	0.451	0.441	0.409	0.418	0.424	0.414	0.415	0.42	0.411	0.433	0.415	0.444	0.429	0.419	0.357	0.377	0.337	0.344
	05:35:06	0.074	0.073	0.073	0.071	0.7	0.718	0.642	0.683	0.653	0.689	0.614	0.626	0.701	0.686	0.651	0.685	0.682	0.704	0.696	0.736	0.71	0.722	0.752	0.701	0.435	0.431	0.431	0.413	0.42	0.427	0.406	0.451	0.412	0.426	0.428	0.42	0.422	0.428	0.415	0.439	0.42	0.447	0.432	0.424	0.366	0.387	0.346	0.353
	05:40:06	0.074	0.073	0.072	0.071	0.69	0.716	0.643	0.684	0.647	0.687	0.618	0.622	0.709	0.685	0.651	0.693	0.684	0.714	0.701	0.746	0.717	0.72	0.765	0.701	0.437	0.441	0.443	0.424	0.432	0.436	0.418	0.464	0.417	0.428	0.432	0.425	0.428	0.438	0.424	0.451	0.427	0.456	0.434	0.421	0.373	0.397	0.355	0.363
	05:45:06	0.074	0.073	0.073	0.071	0.729	0.743	0.67	0.711	0.679	0.718	0.642	0.647	0.741	0.718	0.679	0.718	0.717	0.736	0.723	0.767	0.739	0.742	0.788	0.733	0.441	0.435	0.443	0.423	0.427	0.441	0.417	0.462	0.418	0.427	0.432	0.431	0.425	0.441	0.426	0.454	0.434	0.454	0.44	0.424	0.386	0.41	0.369	0.375
	05:50:06	0.073	0.073	0.073	0.071	0.745	0.769	0.69	0.734	0.695	0.736	0.655	0.659	0.763	0.742	0.7	0.734	0.729	0.748	0.743	0.783	0.755	0.767	0.81	0.751	0.446	0.443	0.449	0.429	0.434	0.443	0.42	0.468	0.421	0.434	0.442	0.433	0.435	0.447	0.428	0.461	0.439	0.459	0.448	0.432	0.4	0.419	0.379	0.385
	05:55:06	0.074	0.073	0.073	0.071	0.766	0.783	0.702	0.746	0.709	0.753	0.668	0.673	0.778	0.757	0.707	0.749	0.734	0.763	0.753	0.797	0.77	0.779	0.817	0.766	0.449	0.452	0.457	0.436	0.443	0.447	0.428	0.477	0.428	0.436	0.442	0.438	0.442	0.449	0.434	0.462	0.44	0.464	0.446	0.433	0.403	0.431	0.386	0.392
	06:00:06	0.075	0.073	0.073	0.071	0.785	0.8	0.725	0.766	0.726	0.771	0.69	0.69	0.794	0.769	0.733	0.766	0.761	0.78	0.774	0.814	0.788	0.793	0.829	0.779	0.463	0.453	0.461	0.436	0.446	0.451	0.431	0.478	0.426	0.443	0.452	0.439	0.447	0.453	0.437	0.466	0.445	0.463	0.456	0.443	0.409	0.44	0.397	0.402
	06:05:06	0.074	0.073	0.073	0.071	0.802	0.824	0.748	0.789	0.749	0.793	0.718	0.713	0.815	0.793	0.749	0.782	0.773	0.788	0.794	0.828	0.805	0.818	0.856	0.804	0.469	0.465	0.475	0.443	0.457	0.466	0.45	0.501	0.44	0.456	0.465	0.456	0.458	0.47	0.447	0.488	0.458	0.483	0.47	0.45	0.415	0.445	0.409	0.413
	06:10:06	0.076	0.075	0.074	0.072	0.825	0.845	0.757	0.793	0.76	0.811	0.723	0.731	0.83	0.807	0.76	0.788	0.78	0.799	0.799	0.835	0.813	0.828	0.866	0.819	0.482	0.47	0.475	0.45	0.46	0.47	0.45	0.5	0.441	0.462	0.471	0.457	0.461	0.471	0.454	0.484	0.461	0.481	0.475	0.459	0.416	0.452	0.422	0.427
	06:15:06	0.074	0.073	0.073	0.071	0.832	0.854	0.768	0.812	0.767	0.823	0.731	0.735	0.844	0.816	0.777	0.809	0.799	0.816	0.818	0.852	0.834	0.841	0.885	0.832	0.487	0.477	0.483	0.456	0.469	0.476	0.455	0.509	0.45	0.469	0.481	0.47	0.471	0.484	0.463	0.495	0.471	0.489	0.482	0.465	0.417	0.456	0.429	0.433
	06:20:06	0.074	0.073	0.073	0.072	0.856	0.868	0.793	0.832	0.791	0.836	0.757	0.763	0.861	0.832	0.789	0.82	0.814	0.824	0.83	0.861	0.842	0.852	0.896	0.851	0.5	0.487	0.495	0.465	0.478	0.488	0.463	0.522	0.457	0.483	0.491	0.481	0.479	0.498	0.47	0.51	0.48	0.504	0.494	0.479	0.419	0.459	0.434	0.438
	06:25:06	0.074	0.073	0.073	0.072	0.862	0.879	0.808	0.843	0.803	0.849	0.771	0.775	0.871	0.842	0.804	0.832	0.825	0.836	0.842	0.872	0.856	0.863	0.905	0.862	0.516	0.497	0.5	0.468	0.479	0.493	0.466	0.528	0.464	0.492	0.504	0.487	0.486	0.502	0.475	0.514	0.484	0.504	0.506	0.487	0.42	0.46	0.435	0.441
	06:30:06	0.074	0.073	0.073	0.072	0.877	0.891	0.834	0.861	0.83	0.863	0.802	0.805	0.88	0.853	0.817	0.847	0.842	0.85	0.857	0.882	0.87	0.872	0.916	0.874	0.542	0.518	0.527	0.489	0.505	0.518	0.492	0.553	0.488	0.517	0.529	0.508	0.508	0.523	0.495	0.538	0.51	0.529	0.526	0.507	0.427	0.465	0.442	0.446
	06:35:06	0.074	0.073	0.073	0.071	0.891	0.908	0.843	0.875	0.837	0.878	0.808	0.805	0.897	0.874	0.829	0.86	0.853	0.861	0.871	0.897	0.883	0.89	0.935	0.89	0.544	0.517	0.522	0.486	0.499	0.518	0.492	0.554	0.487	0.518	0.531	0.508	0.506	0.52	0.495	0.54	0.513	0.528	0.53	0.511	0.426	0.466	0.441	0.448
	06:40:06	0.074	0.073	0.073	0.071	0.904	0.915	0.845	0.883	0.835	0.885	0.807	0.804	0.908	0.883	0.838	0.871	0.865	0.873	0.883	0.909	0.896	0.902	0.947	0.898	0.55	0.528	0.531	0.496	0.507	0.526	0.495	0.556	0.491	0.526	0.539	0.519	0.512	0.532	0.501	0.542	0.52	0.53	0.534	0.518	0.428	0.466	0.44	0.447
	06:45:06	0.076	0.074	0.074	0.073	0.911	0.927	0.867	0.895	0.865	0.895	0.831	0.845	0.917	0.887	0.853	0.886	0.884	0.887	0.893	0.92	0.909	0.91	0.957	0.908	0.591	0.555	0.559	0.514	0.531	0.545	0.515	0.578	0.512	0.558	0.576	0.543	0.539	0.555	0.517	0.566	0.544	0.551	0.562	0.549	0.441	0.476	0.45	0.455
	06:50:06	0.074	0.073	0.073	0.072	0.924	0.941	0.886	0.912	0.875	0.911	0.847	0.851	0.93	0.904	0.867	0.897	0.89	0.897	0.905	0.929	0.922	0.925	0.97	0.92	0.605	0.563	0.565	0.523	0.535	0.556	0.525	0.589	0.528	0.569	0.582	0.55	0.547	0.563	0.53	0.579	0.552	0.565	0.573	0.563	0.443	0.477	0.45	0.457
	06:55:06	0.076	0.074	0.074	0.073	0.927	0.95	0.882	0.916	0.873	0.919	0.838	0.848	0.946	0.917	0.881	0.914	0.905	0.911	0.914	0.942	0.935	0.936	0.987	0.935	0.609	0.57	0.574	0.531	0.543	0.566	0.533	0.6	0.527	0.572	0.59	0.559	0.555	0.571	0.535	0.586	0.558	0.567	0.581	0.564	0.443	0.482	0.451	0.459
	07:00:06	0.074	0.073	0.073	0.072	0.929	0.96	0.893	0.925	0.888	0.93	0.86	0.865	0.952	0.92	0.887	0.92	0.911	0.915	0.923	0.95	0.946	0.944	0.991	0.935	0.624	0.597	0.593	0.541	0.555	0.576	0.543	0.607	0.542	0.6	0.617	0.577	0.566	0.582	0.541	0.595	0.574	0.577	0.608	0.582	0.444	0.485	0.451	0.459
	07:05:06	0.074	0.073	0.073	0.072	0.936	0.965	0.9	0.936	0.896	0.94	0.873	0.88	0.959	0.928	0.891	0.926	0.92	0.926	0.934	0.961	0.96	0.953	0.997	0.945	0.646	0.612	0.605	0.549	0.565	0.592	0.554	0.621	0.56	0.614	0.632	0.593	0.581	0.595	0.556	0.615	0.583	0.596	0.628	0.602	0.447	0.491	0.456	0.465
	07:10:06	0.074	0.073	0.073	0.072	0.954	0.974	0.907	0.948	0.906	0.948	0.878	0.897	0.978	0.943	0.9	0.935	0.926	0.933	0.944	0.966	0.967	0.968	1.015	0.96	0.656	0.621	0.622	0.564	0.585	0.608	0.571	0.636	0.574	0.633	0.644	0.608	0.599	0.614	0.569	0.632	0.604	0.608	0.638	0.612	0.452	0.496	0.465	0.474
	07:15:06	0.074	0.073	0.073	0.072	0.963	0.983	0.915	0.951	0.917	0.956	0.886	0.911	0.984	0.949	0.907	0.943	0.937	0.94	0.95	0.973	0.975	0.977	1.024	0.966	0.677	0.64	0.638	0.576	0.598	0.624	0.585	0.65	0.588	0.652	0.661	0.621	0.613	0.627	0.585	0.647	0.62	0.62	0.659	0.63	0.455	0.499	0.468	0.478
	07:20:06	0.074	0.073	0.073	0.072	0.966	0.988	0.931	0.959	0.929	0.964	0.9	0.924	0.983	0.951	0.916	0.949	0.947	0.945	0.955	0.982	0.987	0.983	1.028	0.967	0.7	0.67	0.656	0.588	0.609	0.629	0.585	0.659	0.607	0.67	0.68	0.638	0.622	0.634	0.595	0.656	0.622	0.631	0.677	0.649	0.458	0.5	0.471	0.48
	07:25:06	0.075	0.074	0.073	0.072	0.979	0.997	0.944	0.972	0.942	0.974	0.913	0.945	0.989	0.956	0.928	0.959	0.956	0.957	0.968	0.99	0.992	0.996	1.03	0.975	0.712	0.675	0.671	0.608	0.631	0.648	0.613	0.673	0.627	0.682	0.691	0.649	0.638	0.653	0.608	0.671	0.651	0.648	0.7	0.679	0.462	0.507	0.476	0.485
	07:30:06	0.074	0.073	0.073	0.072	0.98	1.01	0.956	0.987	0.955	0.987	0.923	0.956	1.003	0.969	0.942	0.978	0.973	0.976	0.985	1.007	1.008	1.011	1.049	0.989	0.726	0.692	0.682	0.61	0.642	0.662	0.622	0.695	0.639	0.703	0.708	0.667	0.645	0.669	0.623	0.692	0.669	0.656	0.712	0.682	0.464	0.51	0.477	0.487
	07:35:06	0.074	0.073	0.073	0.072	0.99	1.014	0.963	0.986	0.96	0.989	0.934	0.969	1.005	0.973	0.943	0.978	0.982	0.981	0.986	1.013	1.011	1.014	1.047	0.99	0.746	0.712	0.7	0.63	0.657	0.673	0.639	0.702	0.654	0.713	0.722	0.679	0.663	0.675	0.63	0.701	0.683	0.669	0.731	0.707	0.466	0.512	0.48	0.49
	07:40:06	0.074	0.073	0.073	0.072	1.002	1.02	0.978	1.001	0.976	1	0.947	0.979	1.008	0.977	0.958	0.989	0.987	0.989	0.999	1.02	1.02	1.028	1.057	0.998	0.761	0.725	0.705	0.648	0.668	0.697	0.657	0.72	0.681	0.731	0.735	0.69	0.679	0.689	0.659	0.723	0.7	0.694	0.752	0.721	0.474	0.519	0.487	0.496
	07:45:06	0.074	0.073	0.073	0.072	1.003	1.028	0.981	1.006	0.975	1.008	0.951	0.991	1.02	0.99	0.964	0.999	0.995	0.996	1.006	1.028	1.029	1.034	1.064	1.008	0.771	0.742	0.717	0.648	0.681	0.706	0.671	0.735	0.684	0.744	0.75	0.706	0.696	0.708	0.664	0.726	0.713	0.705	0.766	0.731	0.475	0.52	0.487	0.498
	07:50:06	0.074	0.074	0.073	0.072	1.012	1.035	0.993	1.016	0.994	1.018	0.967	1.004	1.026	0.991	0.971	1.006	1.004	1.005	1.018	1.033	1.033	1.044	1.069	1.013	0.79	0.76	0.736	0.675	0.697	0.716	0.674	0.748	0.711	0.761	0.768	0.733	0.716	0.725	0.68	0.74	0.729	0.724	0.79	0.755	0.48	0.527	0.493	0.503
	07:55:06	0.074	0.073	0.073	0.072	1.006	1.039	1.003	1.021	0.998	1.021	0.972	1.011	1.025	0.994	0.979	1.012	1.011	1.01	1.021	1.039	1.042	1.052	1.072	1.014	0.803	0.775	0.751	0.692	0.712	0.739	0.697	0.763	0.737	0.774	0.778	0.744	0.732	0.74	0.701	0.762	0.745	0.743	0.801	0.767	0.49	0.533	0.501	0.51
	08:00:06	0.074	0.074	0.073	0.072	1.013	1.043	1.007	1.028	1.007	1.029	0.981	1.023	1.035	1.005	0.987	1.021	1.024	1.019	1.03	1.048	1.046	1.058	1.074	1.02	0.816	0.791	0.767	0.697	0.725	0.756	0.719	0.772	0.74	0.789	0.792	0.761	0.743	0.758	0.715	0.78	0.758	0.747	0.814	0.781	0.491	0.533	0.5	0.51
	08:05:06	0.074	0.073	0.073	0.072	1.028	1.05	1.018	1.036	1.015	1.035	0.992	1.035	1.041	1.011	0.994	1.03	1.03	1.028	1.041	1.056	1.058	1.07	1.084	1.028	0.831	0.808	0.777	0.701	0.738	0.767	0.729	0.792	0.763	0.804	0.806	0.772	0.749	0.765	0.725	0.789	0.773	0.766	0.833	0.795	0.495	0.539	0.504	0.514
	08:10:06	0.074	0.074	0.073	0.072	1.024	1.055	1.022	1.037	1.024	1.04	1.001	1.047	1.049	1.019	0.996	1.033	1.032	1.03	1.044	1.059	1.061	1.074	1.087	1.032	0.843	0.823	0.791	0.712	0.756	0.779	0.747	0.804	0.777	0.82	0.818	0.789	0.765	0.783	0.738	0.802	0.789	0.777	0.849	0.808	0.497	0.541	0.505	0.515
	08:15:06	0.075	0.074	0.073	0.072	1.026	1.055	1.027	1.041	1.029	1.037	1.01	1.057	1.047	1.017	0.999	1.036	1.041	1.037	1.047	1.063	1.059	1.076	1.086	1.029	0.85	0.83	0.806	0.74	0.77	0.79	0.757	0.808	0.791	0.827	0.83	0.801	0.782	0.791	0.753	0.815	0.8	0.791	0.862	0.82	0.505	0.547	0.514	0.523
	08:20:06	0.074	0.074	0.073	0.072	1.041	1.063	1.034	1.047	1.034	1.051	1.013	1.064	1.054	1.027	1.009	1.045	1.047	1.043	1.055	1.068	1.071	1.091	1.094	1.039	0.861	0.841	0.811	0.737	0.771	0.807	0.777	0.827	0.807	0.842	0.841	0.805	0.778	0.798	0.765	0.828	0.814	0.801	0.875	0.835	0.507	0.548	0.513	0.525
	08:25:06	0.074	0.074	0.073	0.072	1.034	1.067	1.042	1.051	1.039	1.055	1.02	1.07	1.057	1.029	1.015	1.051	1.051	1.046	1.06	1.074	1.073	1.093	1.094	1.044	0.873	0.856	0.827	0.747	0.793	0.818	0.784	0.843	0.817	0.849	0.851	0.823	0.797	0.812	0.776	0.841	0.83	0.819	0.887	0.843	0.507	0.548	0.513	0.524
	08:30:06	0.074	0.074	0.074	0.073	1.047	1.074	1.045	1.056	1.044	1.057	1.027	1.078	1.065	1.037	1.021	1.055	1.062	1.052	1.065	1.08	1.076	1.102	1.104	1.049	0.883	0.869	0.846	0.77	0.808	0.833	0.798	0.852	0.831	0.865	0.862	0.837	0.811	0.818	0.79	0.855	0.844	0.825	0.9	0.856	0.514	0.554	0.518	0.529
	08:35:06	0.074	0.074	0.073	0.072	1.054	1.076	1.054	1.062	1.05	1.066	1.033	1.088	1.063	1.04	1.029	1.059	1.067	1.055	1.069	1.086	1.083	1.11	1.105	1.052	0.893	0.88	0.855	0.78	0.819	0.848	0.817	0.859	0.846	0.875	0.873	0.851	0.826	0.84	0.806	0.869	0.858	0.837	0.912	0.865	0.523	0.563	0.527	0.537
	08:40:06	0.074	0.074	0.074	0.073	1.055	1.078	1.061	1.068	1.059	1.073	1.043	1.1	1.069	1.044	1.031	1.067	1.072	1.065	1.079	1.089	1.085	1.121	1.109	1.059	0.909	0.89	0.873	0.793	0.84	0.853	0.82	0.869	0.85	0.888	0.884	0.866	0.845	0.855	0.817	0.882	0.872	0.848	0.93	0.882	0.52	0.564	0.526	0.539
	08:45:06	0.077	0.075	0.075	0.074	1.057	1.084	1.061	1.066	1.064	1.069	1.045	1.103	1.071	1.046	1.034	1.069	1.078	1.07	1.078	1.09	1.087	1.127	1.108	1.056	0.915	0.9	0.881	0.815	0.85	0.862	0.833	0.879	0.863	0.895	0.893	0.874	0.855	0.863	0.835	0.891	0.877	0.856	0.939	0.891	0.532	0.575	0.537	0.548
	08:50:06	0.074	0.074	0.074	0.072	1.065	1.093	1.071	1.08	1.071	1.085	1.056	1.103	1.084	1.059	1.044	1.077	1.081	1.073	1.09	1.102	1.097	1.139	1.12	1.071	0.923	0.911	0.883	0.808	0.856	0.873	0.845	0.894	0.879	0.908	0.9	0.882	0.857	0.872	0.838	0.901	0.893	0.867	0.946	0.898	0.534	0.575	0.536	0.548
	08:55:06	0.077	0.075	0.075	0.074	1.067	1.098	1.077	1.083	1.077	1.084	1.059	1.112	1.079	1.055	1.047	1.083	1.09	1.083	1.092	1.101	1.1	1.145	1.121	1.069	0.939	0.924	0.904	0.832	0.876	0.883	0.855	0.897	0.888	0.919	0.915	0.898	0.876	0.886	0.857	0.915	0.904	0.88	0.961	0.912	0.539	0.582	0.543	0.556
	09:00:06	0.075	0.074	0.074	0.073	1.071	1.108	1.083	1.09	1.084	1.095	1.067	1.114	1.093	1.065	1.056	1.09	1.096	1.085	1.101	1.112	1.111	1.156	1.13	1.08	0.943	0.937	0.91	0.834	0.884	0.9	0.873	0.915	0.905	0.929	0.922	0.907	0.885	0.899	0.867	0.927	0.919	0.89	0.966	0.916	0.544	0.586	0.546	0.558
	09:05:06	0.074	0.074	0.074	0.073	1.074	1.108	1.085	1.092	1.085	1.096	1.069	1.115	1.088	1.063	1.055	1.09	1.101	1.087	1.102	1.113	1.109	1.153	1.121	1.079	0.944	0.941	0.925	0.846	0.894	0.907	0.881	0.92	0.912	0.933	0.929	0.919	0.898	0.91	0.88	0.935	0.93	0.901	0.977	0.921	0.544	0.586	0.547	0.558
	09:10:06	0.074	0.074	0.074	0.072	1.081	1.11	1.091	1.098	1.091	1.098	1.075	1.119	1.098	1.069	1.062	1.097	1.106	1.093	1.109	1.117	1.114	1.164	1.127	1.083	0.951	0.949	0.93	0.852	0.905	0.917	0.891	0.93	0.919	0.94	0.936	0.926	0.907	0.919	0.885	0.945	0.939	0.909	0.985	0.929	0.556	0.596	0.557	0.569
	09:15:06	0.077	0.075	0.075	0.074	1.079	1.109	1.094	1.096	1.09	1.098	1.078	1.119	1.095	1.068	1.066	1.101	1.112	1.095	1.112	1.12	1.11	1.165	1.122	1.078	0.954	0.96	0.939	0.869	0.915	0.927	0.903	0.937	0.926	0.944	0.942	0.933	0.917	0.928	0.898	0.953	0.948	0.922	0.988	0.933	0.566	0.602	0.565	0.572
	09:20:06	0.075	0.074	0.074	0.072	1.084	1.109	1.093	1.093	1.096	1.098	1.083	1.118	1.098	1.081	1.067	1.096	1.112	1.094	1.106	1.119	1.116	1.169	1.131	1.089	0.964	0.96	0.945	0.872	0.925	0.931	0.913	0.948	0.933	0.953	0.946	0.938	0.923	0.933	0.905	0.959	0.957	0.927	0.995	0.94	0.56	0.596	0.558	0.571
	09:25:06	0.075	0.074	0.074	0.073	1.081	1.111	1.097	1.099	1.098	1.102	1.084	1.117	1.097	1.068	1.067	1.099	1.114	1.097	1.112	1.123	1.109	1.171	1.123	1.084	0.967	0.971	0.955	0.883	0.932	0.941	0.922	0.953	0.942	0.957	0.953	0.948	0.934	0.944	0.915	0.968	0.966	0.938	1.001	0.947	0.571	0.609	0.569	0.58
	09:30:06	0.077	0.075	0.075	0.074	1.097	1.121	1.109	1.108	1.11	1.109	1.096	1.122	1.106	1.077	1.08	1.111	1.126	1.11	1.12	1.128	1.114	1.184	1.13	1.092	0.979	0.984	0.968	0.895	0.948	0.956	0.938	0.967	0.948	0.968	0.967	0.962	0.945	0.959	0.927	0.984	0.981	0.949	1.018	0.962	0.569	0.613	0.571	0.585
	09:35:06	0.075	0.074	0.074	0.072	1.089	1.124	1.109	1.109	1.11	1.115	1.094	1.12	1.104	1.086	1.083	1.113	1.127	1.11	1.127	1.134	1.122	1.186	1.136	1.1	0.984	0.992	0.975	0.903	0.952	0.964	0.945	0.979	0.965	0.977	0.971	0.969	0.954	0.967	0.938	0.992	0.991	0.961	1.022	0.967	0.58	0.619	0.578	0.589
	09:40:06	0.075	0.074	0.074	0.073	1.093	1.124	1.113	1.112	1.113	1.118	1.102	1.117	1.102	1.086	1.09	1.115	1.131	1.112	1.131	1.137	1.123	1.189	1.137	1.1	0.989	0.998	0.988	0.919	0.964	0.978	0.957	0.986	0.974	0.984	0.98	0.979	0.963	0.976	0.947	1.001	1	0.971	1.032	0.974	0.587	0.626	0.586	0.597
	09:45:06	0.075	0.074	0.074	0.073	1.096	1.128	1.117	1.114	1.115	1.121	1.106	1.115	1.11	1.092	1.092	1.117	1.136	1.115	1.131	1.138	1.13	1.194	1.142	1.107	0.999	1.007	0.997	0.928	0.975	0.988	0.967	0.996	0.984	0.994	0.986	0.988	0.973	0.986	0.956	1.011	1.007	0.979	1.042	0.981	0.587	0.626	0.587	0.597
	09:50:06	0.075	0.074	0.074	0.073	1.094	1.123	1.115	1.112	1.113	1.119	1.103	1.11	1.101	1.081	1.096	1.118	1.138	1.117	1.136	1.142	1.131	1.189	1.133	1.099	0.996	1.009	1.001	0.942	0.981	0.99	0.971	1.003	0.985	0.989	0.991	0.991	0.979	0.987	0.962	1.013	1.009	0.987	1.044	0.984	0.596	0.631	0.594	0.603
	09:55:06	0.075	0.074	0.074	0.073	1.095	1.123	1.117	1.113	1.115	1.121	1.106	1.103	1.104	1.082	1.094	1.121	1.142	1.118	1.136	1.141	1.132	1.193	1.14	1.1	1.002	1.014	1.007	0.95	0.991	0.999	0.98	1.009	0.992	0.997	0.994	1.002	0.99	0.998	0.972	1.022	1.017	0.998	1.047	0.993	0.601	0.637	0.6	0.608
	10:00:06	0.077	0.076	0.075	0.074	1.096	1.127	1.122	1.122	1.12	1.128	1.114	1.111	1.11	1.083	1.093	1.13	1.149	1.13	1.14	1.143	1.129	1.198	1.143	1.096	1.019	1.024	1.013	0.956	1	1.007	0.989	1.02	0.998	1.008	1.007	1.01	0.998	1.007	0.979	1.033	1.027	1.005	1.063	1.004	0.596	0.636	0.594	0.611
	10:05:06	0.077	0.075	0.075	0.074	1.094	1.123	1.12	1.125	1.123	1.13	1.113	1.099	1.114	1.081	1.091	1.131	1.15	1.133	1.143	1.148	1.135	1.193	1.143	1.093	1.019	1.034	1.022	0.961	1.004	1.013	0.996	1.032	1.011	1.016	1.011	1.016	1.007	1.016	0.988	1.038	1.035	1.013	1.069	1.004	0.607	0.646	0.605	0.62
	10:10:06	0.075	0.074	0.074	0.073	1.091	1.126	1.118	1.121	1.12	1.128	1.114	1.074	1.112	1.085	1.095	1.13	1.146	1.13	1.142	1.149	1.14	1.195	1.151	1.095	1.027	1.035	1.022	0.955	1.005	1.013	0.998	1.037	1.018	1.022	1.014	1.016	1.003	1.013	0.992	1.038	1.039	1.018	1.071	1.011	0.602	0.64	0.601	0.614
	10:15:06	0.075	0.074	0.074	0.073	1.094	1.125	1.12	1.123	1.119	1.13	1.108	1.076	1.113	1.089	1.097	1.133	1.149	1.134	1.146	1.151	1.138	1.192	1.147	1.097	1.03	1.046	1.037	0.982	1.024	1.032	1.017	1.051	1.028	1.028	1.022	1.029	1.023	1.028	1.006	1.052	1.049	1.033	1.075	1.017	0.608	0.646	0.608	0.62
	10:20:06	0.075	0.074	0.074	0.073	1.098	1.126	1.122	1.129	1.12	1.133	1.11	1.072	1.113	1.088	1.097	1.135	1.153	1.138	1.15	1.156	1.141	1.194	1.147	1.096	1.034	1.052	1.043	0.989	1.029	1.038	1.022	1.059	1.035	1.031	1.029	1.038	1.03	1.032	1.01	1.055	1.055	1.038	1.085	1.021	0.616	0.654	0.616	0.629
	10:25:06	0.075	0.074	0.074	0.073	1.095	1.127	1.119	1.126	1.115	1.131	1.107	1.058	1.116	1.09	1.098	1.133	1.15	1.137	1.148	1.152	1.146	1.193	1.149	1.1	1.043	1.057	1.049	0.997	1.035	1.043	1.029	1.067	1.042	1.04	1.034	1.04	1.036	1.041	1.019	1.063	1.06	1.049	1.09	1.031	0.614	0.656	0.617	0.626
	10:30:06	0.075	0.074	0.074	0.073	1.095	1.125	1.121	1.127	1.118	1.13	1.108	1.055	1.109	1.082	1.096	1.134	1.149	1.139	1.15	1.155	1.143	1.186	1.14	1.095	1.04	1.059	1.05	1.003	1.039	1.047	1.03	1.07	1.041	1.034	1.037	1.048	1.043	1.043	1.026	1.068	1.063	1.055	1.089	1.027	0.623	0.661	0.624	0.634
	10:35:06	0.075	0.074	0.074	0.073	1.091	1.117	1.112	1.116	1.111	1.12	1.104	1.047	1.104	1.081	1.094	1.13	1.143	1.132	1.144	1.153	1.135	1.181	1.135	1.093	1.046	1.06	1.052	1.007	1.044	1.051	1.038	1.075	1.047	1.041	1.04	1.05	1.047	1.049	1.029	1.072	1.069	1.058	1.094	1.037	0.627	0.664	0.629	0.637
	10:40:06	0.077	0.076	0.076	0.074	1.091	1.125	1.121	1.129	1.118	1.13	1.107	1.046	1.11	1.084	1.096	1.14	1.149	1.14	1.145	1.152	1.139	1.178	1.143	1.091	1.056	1.071	1.059	1.017	1.05	1.054	1.041	1.08	1.05	1.046	1.044	1.055	1.053	1.057	1.034	1.078	1.072	1.068	1.104	1.044	0.625	0.667	0.629	0.646
	10:45:06	0.075	0.074	0.074	0.073	1.092	1.119	1.113	1.125	1.114	1.13	1.101	1.048	1.114	1.09	1.096	1.133	1.145	1.138	1.146	1.154	1.145	1.172	1.144	1.099	1.055	1.076	1.067	1.023	1.058	1.066	1.054	1.098	1.065	1.058	1.051	1.061	1.059	1.063	1.043	1.084	1.08	1.08	1.103	1.046	0.627	0.672	0.634	0.643
	10:50:06	0.075	0.075	0.074	0.073	1.089	1.115	1.11	1.117	1.11	1.121	1.098	1.047	1.104	1.082	1.089	1.128	1.142	1.137	1.143	1.15	1.133	1.165	1.133	1.092	1.056	1.075	1.068	1.029	1.061	1.069	1.058	1.095	1.067	1.054	1.054	1.064	1.065	1.068	1.051	1.089	1.084	1.084	1.105	1.051	0.639	0.678	0.641	0.65
	10:55:06	0.077	0.076	0.076	0.074	1.091	1.121	1.115	1.118	1.112	1.12	1.097	1.051	1.103	1.081	1.09	1.126	1.141	1.135	1.142	1.148	1.135	1.159	1.134	1.087	1.061	1.081	1.075	1.037	1.065	1.069	1.057	1.103	1.064	1.058	1.059	1.071	1.071	1.072	1.055	1.095	1.087	1.094	1.114	1.055	0.64	0.681	0.643	0.656
	11:00:06	0.075	0.074	0.074	0.073	1.091	1.116	1.11	1.119	1.109	1.12	1.095	1.038	1.106	1.079	1.087	1.129	1.139	1.137	1.141	1.146	1.13	1.153	1.13	1.086	1.06	1.086	1.079	1.043	1.073	1.076	1.066	1.112	1.078	1.063	1.057	1.072	1.076	1.076	1.058	1.094	1.088	1.096	1.109	1.056	0.646	0.686	0.651	0.658
	11:05:06	0.075	0.074	0.074	0.073	1.09	1.115	1.114	1.121	1.112	1.122	1.094	1.056	1.11	1.081	1.092	1.125	1.141	1.138	1.14	1.146	1.133	1.149	1.132	1.089	1.067	1.09	1.083	1.048	1.076	1.079	1.069	1.117	1.074	1.063	1.062	1.074	1.079	1.081	1.06	1.101	1.092	1.105	1.119	1.063	0.646	0.687	0.649	0.662
	11:10:06	0.075	0.075	0.074	0.073	1.089	1.114	1.107	1.114	1.109	1.115	1.092	1.052	1.102	1.079	1.092	1.126	1.138	1.131	1.139	1.142	1.128	1.137	1.128	1.086	1.066	1.091	1.086	1.055	1.079	1.084	1.076	1.125	1.078	1.064	1.065	1.077	1.086	1.085	1.066	1.104	1.092	1.105	1.109	1.061	0.66	0.694	0.662	0.666
	11:15:06	0.075	0.074	0.074	0.073	1.094	1.114	1.109	1.117	1.106	1.119	1.087	1.033	1.109	1.09	1.09	1.122	1.13	1.129	1.135	1.144	1.141	1.131	1.141	1.096	1.075	1.094	1.088	1.058	1.084	1.089	1.078	1.132	1.088	1.073	1.073	1.083	1.089	1.089	1.075	1.107	1.102	1.117	1.12	1.074	0.645	0.687	0.653	0.659
	11:20:06	0.077	0.076	0.076	0.074	1.094	1.116	1.109	1.117	1.112	1.115	1.092	1.042	1.108	1.079	1.094	1.125	1.134	1.129	1.138	1.143	1.133	1.12	1.134	1.092	1.075	1.096	1.087	1.061	1.085	1.09	1.079	1.139	1.085	1.072	1.075	1.094	1.095	1.091	1.08	1.114	1.104	1.128	1.128	1.078	0.662	0.7	0.665	0.675
	11:25:06	0.077	0.076	0.076	0.074	1.096	1.114	1.108	1.117	1.11	1.12	1.09	1.044	1.108	1.08	1.089	1.126	1.134	1.132	1.14	1.14	1.128	1.115	1.122	1.091	1.081	1.102	1.097	1.07	1.094	1.1	1.09	1.147	1.094	1.077	1.076	1.091	1.101	1.099	1.083	1.116	1.102	1.126	1.123	1.078	0.659	0.699	0.667	0.672
	11:30:06	0.075	0.074	0.074	0.073	1.099	1.116	1.111	1.118	1.111	1.121	1.089	1.03	1.109	1.09	1.095	1.124	1.132	1.13	1.136	1.146	1.14	1.116	1.137	1.098	1.083	1.106	1.096	1.07	1.097	1.102	1.09	1.153	1.1	1.082	1.082	1.098	1.101	1.098	1.092	1.119	1.11	1.133	1.13	1.085	0.656	0.696	0.667	0.671
	11:35:06	0.08	0.077	0.077	0.074	1.093	1.112	1.11	1.116	1.112	1.112	1.091	1.028	1.104	1.081	1.089	1.122	1.133	1.124	1.134	1.14	1.125	1.113	1.122	1.089	1.079	1.103	1.096	1.073	1.09	1.094	1.087	1.156	1.093	1.071	1.08	1.096	1.102	1.095	1.089	1.115	1.101	1.137	1.124	1.08	0.676	0.708	0.679	0.686
	11:40:06	0.075	0.075	0.074	0.073	1.095	1.113	1.107	1.113	1.112	1.116	1.092	1.026	1.109	1.088	1.089	1.122	1.129	1.128	1.135	1.143	1.131	1.113	1.129	1.096	1.087	1.106	1.098	1.077	1.103	1.108	1.097	1.161	1.107	1.082	1.086	1.105	1.11	1.107	1.099	1.126	1.115	1.143	1.13	1.086	0.665	0.7	0.676	0.682
	11:45:06	0.075	0.075	0.074	0.073	1.103	1.119	1.117	1.121	1.115	1.125	1.09	1.033	1.112	1.098	1.099	1.127	1.135	1.132	1.14	1.15	1.139	1.113	1.137	1.104	1.091	1.111	1.104	1.09	1.107	1.115	1.104	1.17	1.114	1.089	1.095	1.115	1.118	1.112	1.11	1.135	1.121	1.153	1.136	1.089	0.664	0.703	0.675	0.679
	11:50:06	0.075	0.075	0.074	0.073	1.102	1.122	1.122	1.126	1.116	1.128	1.092	1.023	1.114	1.098	1.103	1.13	1.14	1.137	1.144	1.15	1.14	1.113	1.137	1.107	1.092	1.11	1.107	1.094	1.107	1.114	1.104	1.173	1.115	1.089	1.087	1.113	1.118	1.114	1.111	1.134	1.122	1.159	1.133	1.092	0.668	0.709	0.682	0.691
	11:55:06	0.075	0.075	0.075	0.073	1.104	1.123	1.124	1.131	1.123	1.131	1.098	1.018	1.119	1.102	1.106	1.129	1.141	1.14	1.141	1.146	1.132	1.121	1.138	1.107	1.098	1.118	1.11	1.095	1.111	1.118	1.106	1.176	1.117	1.094	1.094	1.112	1.12	1.115	1.113	1.136	1.117	1.165	1.144	1.093	0.661	0.705	0.672	0.687
	12:00:06	0.075	0.075	0.075	0.073	1.103	1.121	1.115	1.123	1.116	1.124	1.092	1.017	1.112	1.096	1.104	1.128	1.14	1.139	1.141	1.148	1.128	1.125	1.131	1.107	1.091	1.118	1.112	1.101	1.118	1.125	1.111	1.174	1.123	1.093	1.098	1.118	1.132	1.123	1.12	1.142	1.12	1.165	1.139	1.088	0.664	0.706	0.674	0.689
[truncated: 36 more columns]

## Sheet: WTRep2
	Media	LB	LB+IPTG	LB0N	LB0N+IPTG	LB	LB	LB	LB	LB	LB	LB	LB	LB	LB	LB+IPTG	LB+IPTG	LB+IPTG	LB+IPTG	LB+IPTG	LB+IPTG	LB+IPTG	LB+IPTG	LB+IPTG	LB+IPTG	LB	LB	LB	LB	LB	LB	LB	LB	LB	LB	LB+IPTG	LB+IPTG	LB+IPTG	LB+IPTG	LB+IPTG	LB+IPTG	LB+IPTG	LB+IPTG	LB+IPTG	LB+IPTG	LB0N	LB0N	LB0N	LB0N
	Dilution Factor	Blank	Blank	Blank	Blank	0.001	0.001	0.001	0.001	0.001	0.001	0.001	0.001	0.001	0.001	0.001	0.001	0.001	0.001	0.001	0.001	0.001	0.001	0.001	0.001	1e-05	1e-05	1e-05	1e-05	1e-05	1e-05	1e-05	1e-05	1e-05	1e-05	1e-05	1e-05	1e-05	1e-05	1e-05	1e-05	1e-05	1e-05	1e-05	1e-05	0.001	0.001	0.001	0.001
	Background	N/A	N/A	N/A	N/A	WT	WT	WT	WT	WT	WT	WT	WT	WT	WT	WT	WT	WT	WT	WT	WT	WT	WT	WT	WT	WT	WT	WT	WT	WT	WT	WT	WT	WT	WT	WT	WT	WT	WT	WT	WT	WT	WT	WT	WT	WT	WT	WT	WT
	Ptac	N/A	N/A	N/A	N/A	empty	mltA	mltB	mltC	mltD	mltF	slt70	EcmltE	mltG	rlpA	empty	mltA	mltB	mltC	mltD	mltF	slt70	EcmltE	mltG	rlpA	empty	mltA	mltB	mltC	mltD	mltF	slt70	EcmltE	mltG	rlpA	empty	mltA	mltB	mltC	mltD	mltF	slt70	EcmltE	mltG	rlpA	empty	mltA	mltB	mltC
	hr:min:sec
	00:01:28	0.075	0.071	0.074	0.074	0.074	0.073	0.078	0.075	0.076	0.073	0.074	0.076	0.072	0.071	0.07	0.068	0.068	0.067	0.067	0.067	0.067	0.069	0.069	0.069	0.07	0.068	0.065	0.065	0.065	0.065	0.065	0.066	0.067	0.067	0.068	0.067	0.065	0.065	0.065	0.066	0.066	0.065	0.067	0.068	0.071	0.069	0.067	0.067
	00:05:06	0.071	0.068	0.072	0.071	0.072	0.072	0.077	0.074	0.075	0.072	0.073	0.075	0.071	0.069	0.068	0.067	0.067	0.066	0.066	0.066	0.066	0.068	0.068	0.068	0.068	0.067	0.065	0.064	0.065	0.065	0.064	0.065	0.066	0.066	0.067	0.066	0.065	0.064	0.064	0.065	0.065	0.065	0.066	0.067	0.068	0.067	0.066	0.066
	00:10:06	0.07	0.067	0.069	0.069	0.071	0.071	0.077	0.074	0.074	0.072	0.073	0.074	0.07	0.068	0.067	0.067	0.067	0.066	0.066	0.066	0.066	0.068	0.067	0.067	0.067	0.066	0.064	0.064	0.064	0.064	0.064	0.065	0.066	0.065	0.066	0.065	0.064	0.064	0.064	0.065	0.065	0.064	0.066	0.067	0.068	0.067	0.065	0.065
	00:15:06	0.069	0.067	0.069	0.069	0.071	0.071	0.077	0.074	0.075	0.072	0.073	0.075	0.071	0.068	0.068	0.067	0.067	0.066	0.067	0.067	0.066	0.068	0.068	0.067	0.067	0.066	0.064	0.063	0.064	0.064	0.064	0.065	0.065	0.065	0.065	0.065	0.064	0.064	0.064	0.065	0.065	0.064	0.065	0.067	0.068	0.067	0.065	0.065
	00:20:06	0.069	0.067	0.069	0.07	0.071	0.072	0.078	0.075	0.075	0.073	0.074	0.075	0.071	0.069	0.068	0.067	0.067	0.066	0.067	0.067	0.066	0.069	0.068	0.068	0.067	0.066	0.064	0.064	0.064	0.064	0.064	0.065	0.065	0.065	0.066	0.065	0.064	0.064	0.064	0.064	0.065	0.064	0.065	0.067	0.068	0.067	0.065	0.065
	00:25:06	0.069	0.067	0.069	0.067	0.072	0.072	0.078	0.075	0.076	0.073	0.074	0.076	0.071	0.069	0.069	0.068	0.068	0.067	0.068	0.068	0.067	0.069	0.068	0.068	0.067	0.066	0.064	0.063	0.064	0.064	0.064	0.064	0.065	0.065	0.065	0.065	0.064	0.064	0.064	0.064	0.065	0.064	0.065	0.067	0.069	0.067	0.065	0.065
	00:30:06	0.07	0.068	0.07	0.068	0.074	0.074	0.08	0.077	0.077	0.075	0.075	0.077	0.073	0.071	0.07	0.069	0.069	0.068	0.069	0.069	0.068	0.07	0.069	0.069	0.068	0.067	0.064	0.064	0.065	0.065	0.064	0.065	0.066	0.066	0.066	0.066	0.065	0.064	0.064	0.065	0.065	0.065	0.066	0.068	0.069	0.067	0.066	0.066
	00:35:06	0.069	0.068	0.069	0.068	0.074	0.074	0.08	0.077	0.077	0.075	0.076	0.077	0.073	0.071	0.071	0.069	0.07	0.068	0.069	0.069	0.068	0.07	0.07	0.069	0.068	0.066	0.064	0.064	0.064	0.064	0.064	0.065	0.066	0.066	0.065	0.065	0.064	0.064	0.064	0.065	0.065	0.064	0.065	0.067	0.069	0.067	0.066	0.065
	00:40:06	0.07	0.068	0.069	0.068	0.075	0.076	0.082	0.079	0.079	0.076	0.077	0.079	0.074	0.071	0.073	0.071	0.072	0.07	0.07	0.071	0.069	0.071	0.071	0.07	0.068	0.067	0.064	0.064	0.064	0.064	0.064	0.065	0.066	0.066	0.066	0.066	0.065	0.064	0.064	0.065	0.065	0.065	0.065	0.068	0.069	0.067	0.066	0.066
	00:45:06	0.07	0.069	0.07	0.069	0.077	0.077	0.083	0.08	0.08	0.078	0.079	0.08	0.076	0.074	0.075	0.072	0.073	0.071	0.072	0.073	0.07	0.072	0.072	0.072	0.068	0.067	0.064	0.064	0.065	0.065	0.064	0.065	0.066	0.067	0.066	0.066	0.065	0.064	0.064	0.065	0.065	0.065	0.066	0.068	0.07	0.067	0.066	0.066
	00:50:06	0.068	0.068	0.069	0.069	0.079	0.08	0.086	0.083	0.082	0.08	0.08	0.082	0.077	0.074	0.077	0.074	0.075	0.073	0.074	0.075	0.071	0.074	0.073	0.072	0.068	0.067	0.064	0.064	0.065	0.064	0.064	0.065	0.066	0.066	0.066	0.066	0.064	0.064	0.064	0.065	0.065	0.065	0.065	0.068	0.07	0.067	0.066	0.066
	00:55:06	0.069	0.069	0.07	0.069	0.082	0.082	0.088	0.085	0.084	0.082	0.082	0.084	0.079	0.076	0.079	0.075	0.078	0.074	0.076	0.077	0.073	0.076	0.075	0.075	0.069	0.067	0.065	0.064	0.065	0.065	0.064	0.065	0.067	0.067	0.067	0.066	0.065	0.064	0.064	0.065	0.065	0.065	0.066	0.069	0.07	0.068	0.066	0.066
	01:00:06	0.069	0.068	0.069	0.069	0.085	0.084	0.09	0.088	0.086	0.084	0.084	0.085	0.081	0.077	0.082	0.077	0.08	0.076	0.078	0.079	0.074	0.077	0.077	0.076	0.068	0.067	0.065	0.064	0.065	0.064	0.064	0.065	0.066	0.066	0.066	0.066	0.065	0.064	0.064	0.065	0.065	0.065	0.066	0.068	0.07	0.068	0.066	0.066
	01:05:06	0.071	0.07	0.071	0.07	0.091	0.089	0.095	0.092	0.09	0.089	0.088	0.09	0.085	0.081	0.087	0.081	0.084	0.08	0.081	0.084	0.078	0.08	0.081	0.08	0.07	0.068	0.065	0.065	0.065	0.065	0.065	0.066	0.068	0.068	0.067	0.067	0.065	0.065	0.064	0.065	0.066	0.065	0.066	0.07	0.072	0.069	0.067	0.067
	01:10:06	0.069	0.069	0.07	0.069	0.095	0.093	0.098	0.096	0.093	0.092	0.091	0.092	0.087	0.082	0.091	0.084	0.088	0.083	0.085	0.087	0.079	0.083	0.083	0.081	0.069	0.067	0.065	0.064	0.065	0.065	0.065	0.065	0.066	0.067	0.066	0.066	0.065	0.065	0.064	0.065	0.065	0.065	0.066	0.068	0.071	0.068	0.066	0.067
	01:15:06	0.069	0.069	0.07	0.069	0.101	0.098	0.103	0.101	0.096	0.096	0.094	0.095	0.09	0.084	0.097	0.088	0.093	0.087	0.088	0.092	0.083	0.086	0.087	0.084	0.069	0.067	0.065	0.064	0.065	0.065	0.064	0.065	0.066	0.067	0.066	0.066	0.065	0.064	0.064	0.065	0.065	0.065	0.066	0.069	0.071	0.068	0.067	0.067
	01:20:06	0.069	0.068	0.07	0.069	0.109	0.105	0.109	0.107	0.102	0.102	0.099	0.1	0.095	0.088	0.105	0.093	0.099	0.092	0.094	0.099	0.087	0.091	0.091	0.088	0.069	0.068	0.065	0.064	0.065	0.065	0.065	0.066	0.067	0.067	0.067	0.066	0.065	0.065	0.064	0.065	0.065	0.065	0.066	0.069	0.071	0.068	0.067	0.067
	01:25:06	0.069	0.069	0.07	0.069	0.117	0.112	0.118	0.116	0.109	0.11	0.106	0.107	0.101	0.093	0.114	0.099	0.107	0.098	0.101	0.107	0.092	0.097	0.097	0.093	0.069	0.068	0.065	0.065	0.065	0.065	0.065	0.065	0.067	0.067	0.067	0.066	0.065	0.065	0.065	0.065	0.065	0.065	0.066	0.069	0.072	0.069	0.067	0.067
	01:30:06	0.069	0.069	0.069	0.069	0.129	0.122	0.127	0.126	0.116	0.118	0.114	0.114	0.108	0.098	0.125	0.107	0.117	0.106	0.109	0.116	0.098	0.103	0.105	0.098	0.069	0.068	0.065	0.064	0.065	0.065	0.065	0.065	0.067	0.067	0.067	0.066	0.065	0.065	0.064	0.065	0.065	0.065	0.066	0.069	0.072	0.069	0.067	0.068
	01:35:06	0.072	0.071	0.072	0.071	0.147	0.137	0.142	0.141	0.128	0.133	0.126	0.126	0.12	0.107	0.141	0.118	0.132	0.116	0.121	0.131	0.108	0.113	0.115	0.108	0.071	0.069	0.066	0.066	0.066	0.066	0.066	0.067	0.069	0.069	0.068	0.067	0.066	0.066	0.065	0.066	0.066	0.066	0.067	0.071	0.074	0.07	0.068	0.069
	01:40:06	0.07	0.07	0.071	0.071	0.164	0.151	0.158	0.158	0.142	0.145	0.139	0.136	0.129	0.115	0.158	0.132	0.149	0.129	0.135	0.147	0.117	0.123	0.125	0.115	0.07	0.068	0.065	0.065	0.065	0.065	0.065	0.066	0.068	0.068	0.068	0.067	0.065	0.065	0.065	0.065	0.066	0.065	0.066	0.07	0.073	0.07	0.068	0.069
	01:45:06	0.069	0.069	0.07	0.07	0.186	0.171	0.176	0.178	0.158	0.163	0.154	0.151	0.143	0.125	0.178	0.147	0.168	0.145	0.152	0.167	0.129	0.137	0.14	0.126	0.07	0.068	0.065	0.065	0.065	0.065	0.065	0.066	0.067	0.067	0.067	0.067	0.065	0.065	0.065	0.066	0.066	0.065	0.066	0.069	0.073	0.07	0.068	0.069
	01:50:06	0.071	0.07	0.071	0.071	0.203	0.187	0.196	0.197	0.176	0.179	0.173	0.167	0.159	0.139	0.196	0.166	0.188	0.164	0.171	0.186	0.145	0.153	0.157	0.141	0.07	0.069	0.066	0.065	0.066	0.066	0.065	0.066	0.068	0.068	0.068	0.067	0.066	0.066	0.065	0.066	0.066	0.066	0.067	0.071	0.074	0.071	0.069	0.07
	01:55:06	0.069	0.069	0.07	0.07	0.222	0.203	0.21	0.208	0.198	0.194	0.195	0.179	0.177	0.155	0.211	0.187	0.204	0.184	0.187	0.2	0.166	0.169	0.178	0.158	0.07	0.069	0.066	0.066	0.066	0.066	0.065	0.066	0.068	0.068	0.068	0.067	0.066	0.066	0.065	0.066	0.066	0.066	0.067	0.07	0.074	0.071	0.069	0.07
	02:00:06	0.07	0.069	0.07	0.07	0.241	0.234	0.233	0.233	0.211	0.216	0.209	0.196	0.191	0.171	0.24	0.2	0.214	0.192	0.206	0.214	0.182	0.183	0.189	0.177	0.071	0.069	0.066	0.066	0.066	0.066	0.066	0.067	0.068	0.068	0.068	0.068	0.066	0.066	0.066	0.066	0.066	0.066	0.067	0.07	0.075	0.072	0.07	0.071
	02:05:05	0.071	0.071	0.071	0.071	0.26	0.247	0.251	0.253	0.229	0.238	0.224	0.208	0.209	0.189	0.257	0.212	0.234	0.207	0.219	0.239	0.193	0.194	0.21	0.192	0.072	0.07	0.067	0.066	0.067	0.067	0.066	0.067	0.069	0.069	0.069	0.068	0.067	0.067	0.066	0.067	0.067	0.066	0.067	0.071	0.076	0.073	0.07	0.072
	02:10:06	0.07	0.069	0.07	0.07	0.278	0.262	0.259	0.261	0.243	0.248	0.237	0.226	0.231	0.201	0.269	0.226	0.246	0.223	0.235	0.254	0.209	0.211	0.234	0.206	0.072	0.07	0.067	0.067	0.067	0.067	0.066	0.067	0.068	0.069	0.069	0.068	0.067	0.067	0.066	0.067	0.067	0.067	0.068	0.071	0.076	0.073	0.071	0.072
	02:15:06	0.07	0.069	0.07	0.07	0.299	0.286	0.291	0.293	0.27	0.278	0.263	0.257	0.257	0.232	0.291	0.253	0.275	0.246	0.258	0.28	0.231	0.24	0.259	0.234	0.072	0.07	0.067	0.067	0.067	0.067	0.066	0.068	0.069	0.069	0.07	0.069	0.067	0.067	0.067	0.067	0.067	0.067	0.068	0.071	0.077	0.074	0.072	0.073
	02:20:06	0.071	0.07	0.071	0.071	0.311	0.302	0.31	0.305	0.29	0.298	0.288	0.276	0.28	0.252	0.304	0.278	0.293	0.273	0.282	0.299	0.251	0.259	0.278	0.256	0.073	0.071	0.068	0.068	0.068	0.068	0.067	0.068	0.07	0.07	0.071	0.07	0.068	0.068	0.067	0.068	0.068	0.067	0.069	0.072	0.078	0.075	0.073	0.075
	02:25:06	0.07	0.069	0.07	0.07	0.324	0.307	0.308	0.313	0.295	0.3	0.297	0.286	0.288	0.265	0.313	0.286	0.303	0.282	0.292	0.305	0.268	0.273	0.292	0.268	0.074	0.072	0.069	0.068	0.068	0.068	0.067	0.069	0.069	0.07	0.072	0.07	0.068	0.069	0.068	0.068	0.068	0.068	0.069	0.072	0.079	0.076	0.074	0.076
	02:30:06	0.07	0.069	0.071	0.07	0.365	0.334	0.338	0.337	0.326	0.328	0.322	0.325	0.317	0.296	0.353	0.311	0.33	0.307	0.315	0.33	0.296	0.311	0.321	0.3	0.076	0.073	0.07	0.069	0.07	0.069	0.068	0.07	0.071	0.07	0.073	0.072	0.07	0.07	0.069	0.069	0.069	0.069	0.07	0.072	0.08	0.077	0.075	0.077
	02:35:06	0.071	0.07	0.072	0.071	0.356	0.374	0.366	0.362	0.343	0.364	0.342	0.345	0.336	0.32	0.343	0.331	0.356	0.327	0.335	0.362	0.32	0.326	0.341	0.319	0.077	0.074	0.071	0.071	0.071	0.07	0.069	0.071	0.072	0.072	0.075	0.073	0.071	0.071	0.07	0.07	0.07	0.07	0.071	0.074	0.082	0.079	0.076	0.079
	02:40:06	0.071	0.07	0.072	0.071	0.351	0.345	0.349	0.348	0.346	0.343	0.351	0.347	0.347	0.321	0.342	0.345	0.346	0.342	0.345	0.349	0.323	0.337	0.348	0.327	0.079	0.075	0.073	0.072	0.072	0.071	0.07	0.072	0.073	0.073	0.077	0.075	0.072	0.073	0.071	0.071	0.071	0.071	0.072	0.075	0.084	0.08	0.078	0.081
	02:45:06	0.073	0.071	0.073	0.071	0.359	0.357	0.353	0.353	0.352	0.349	0.352	0.385	0.365	0.355	0.349	0.346	0.351	0.345	0.35	0.354	0.358	0.365	0.378	0.357	0.082	0.078	0.075	0.074	0.074	0.073	0.072	0.074	0.075	0.074	0.08	0.077	0.074	0.075	0.073	0.073	0.072	0.073	0.074	0.076	0.087	0.083	0.08	0.083
	02:50:06	0.07	0.07	0.07	0.071	0.355	0.349	0.346	0.347	0.34	0.339	0.341	0.382	0.349	0.368	0.35	0.336	0.346	0.336	0.339	0.348	0.339	0.399	0.361	0.366	0.083	0.079	0.076	0.075	0.075	0.074	0.072	0.074	0.075	0.074	0.081	0.078	0.075	0.076	0.074	0.074	0.073	0.074	0.075	0.076	0.087	0.084	0.081	0.085
	02:55:06	0.07	0.07	0.07	0.071	0.352	0.355	0.355	0.354	0.346	0.347	0.344	0.375	0.351	0.349	0.396	0.348	0.358	0.347	0.348	0.358	0.347	0.382	0.36	0.351	0.087	0.081	0.078	0.077	0.077	0.075	0.073	0.076	0.076	0.075	0.084	0.08	0.077	0.079	0.076	0.076	0.074	0.076	0.077	0.078	0.09	0.086	0.083	0.088
	03:00:06	0.072	0.071	0.071	0.071	0.371	0.377	0.385	0.407	0.363	0.371	0.36	0.381	0.359	0.35	0.366	0.358	0.393	0.355	0.359	0.382	0.353	0.382	0.367	0.355	0.091	0.085	0.082	0.08	0.08	0.078	0.076	0.079	0.079	0.078	0.088	0.084	0.08	0.082	0.079	0.078	0.077	0.079	0.079	0.081	0.093	0.089	0.086	0.091
	03:05:06	0.071	0.07	0.07	0.071	0.374	0.373	0.373	0.37	0.384	0.368	0.383	0.383	0.37	0.363	0.366	0.403	0.374	0.359	0.396	0.37	0.347	0.379	0.373	0.358	0.096	0.089	0.086	0.084	0.083	0.08	0.078	0.082	0.081	0.079	0.093	0.089	0.084	0.086	0.082	0.081	0.079	0.082	0.082	0.082	0.095	0.092	0.089	0.095
	03:10:06	0.073	0.071	0.071	0.072	0.373	0.377	0.379	0.379	0.374	0.371	0.373	0.388	0.38	0.368	0.372	0.364	0.38	0.366	0.366	0.377	0.359	0.385	0.377	0.362	0.103	0.094	0.091	0.089	0.088	0.085	0.082	0.086	0.085	0.083	0.1	0.094	0.088	0.092	0.087	0.085	0.082	0.086	0.086	0.086	0.099	0.096	0.092	0.099
	03:15:06	0.072	0.071	0.072	0.072	0.383	0.375	0.381	0.381	0.374	0.373	0.374	0.388	0.374	0.372	0.372	0.366	0.381	0.366	0.368	0.376	0.371	0.384	0.382	0.375	0.111	0.1	0.097	0.094	0.093	0.089	0.086	0.091	0.09	0.086	0.108	0.101	0.093	0.098	0.091	0.09	0.086	0.09	0.09	0.089	0.103	0.1	0.096	0.103
	03:20:06	0.072	0.071	0.072	0.072	0.384	0.384	0.382	0.382	0.379	0.38	0.378	0.396	0.382	0.377	0.379	0.373	0.391	0.377	0.377	0.388	0.375	0.397	0.389	0.378	0.122	0.108	0.105	0.101	0.1	0.095	0.091	0.097	0.095	0.09	0.118	0.109	0.1	0.106	0.098	0.095	0.091	0.096	0.096	0.093	0.108	0.104	0.1	0.109
	03:25:06	0.071	0.07	0.071	0.071	0.387	0.384	0.39	0.39	0.384	0.382	0.383	0.395	0.382	0.378	0.385	0.374	0.394	0.376	0.38	0.39	0.375	0.398	0.391	0.377	0.133	0.117	0.114	0.11	0.108	0.102	0.096	0.104	0.101	0.094	0.129	0.119	0.109	0.117	0.106	0.103	0.098	0.104	0.103	0.097	0.112	0.109	0.105	0.114
	03:30:06	0.073	0.071	0.072	0.072	0.398	0.387	0.391	0.394	0.386	0.387	0.384	0.4	0.389	0.378	0.384	0.375	0.394	0.383	0.381	0.387	0.374	0.397	0.395	0.385	0.149	0.13	0.127	0.122	0.12	0.111	0.105	0.113	0.11	0.102	0.145	0.132	0.12	0.13	0.117	0.113	0.106	0.114	0.113	0.106	0.119	0.116	0.11	0.121
	03:35:06	0.071	0.07	0.071	0.071	0.397	0.393	0.399	0.398	0.394	0.393	0.397	0.41	0.393	0.39	0.395	0.39	0.408	0.389	0.393	0.403	0.385	0.41	0.403	0.387	0.162	0.143	0.141	0.135	0.133	0.123	0.114	0.126	0.12	0.11	0.157	0.147	0.132	0.144	0.13	0.124	0.116	0.126	0.124	0.113	0.125	0.122	0.115	0.129
	03:40:06	0.073	0.071	0.072	0.072	0.401	0.393	0.4	0.4	0.396	0.395	0.397	0.408	0.395	0.388	0.397	0.389	0.412	0.395	0.397	0.407	0.389	0.409	0.407	0.388	0.179	0.159	0.156	0.152	0.149	0.137	0.127	0.139	0.133	0.12	0.175	0.163	0.149	0.16	0.145	0.138	0.127	0.139	0.138	0.125	0.133	0.129	0.123	0.137
	03:45:06	0.071	0.07	0.071	0.071	0.411	0.398	0.411	0.41	0.407	0.397	0.406	0.416	0.395	0.39	0.403	0.399	0.422	0.399	0.404	0.415	0.393	0.415	0.408	0.388	0.201	0.172	0.17	0.163	0.16	0.15	0.139	0.15	0.146	0.132	0.196	0.179	0.162	0.176	0.158	0.153	0.141	0.15	0.153	0.137	0.141	0.137	0.13	0.147
	03:50:06	0.073	0.071	0.072	0.072	0.412	0.405	0.414	0.416	0.408	0.411	0.414	0.425	0.406	0.4	0.408	0.406	0.437	0.41	0.418	0.429	0.41	0.429	0.418	0.399	0.215	0.191	0.185	0.181	0.179	0.166	0.155	0.162	0.161	0.148	0.211	0.197	0.182	0.193	0.178	0.168	0.157	0.161	0.168	0.153	0.151	0.146	0.141	0.159
	03:55:06	0.075	0.072	0.073	0.072	0.418	0.416	0.426	0.428	0.415	0.422	0.425	0.431	0.414	0.4	0.418	0.417	0.451	0.419	0.435	0.442	0.417	0.444	0.431	0.409	0.243	0.212	0.205	0.195	0.196	0.185	0.171	0.18	0.179	0.161	0.235	0.215	0.198	0.214	0.194	0.189	0.174	0.181	0.194	0.167	0.163	0.158	0.151	0.171
	04:00:06	0.071	0.07	0.071	0.071	0.418	0.414	0.417	0.425	0.413	0.415	0.419	0.426	0.413	0.401	0.423	0.416	0.451	0.428	0.432	0.443	0.425	0.44	0.433	0.406	0.255	0.225	0.217	0.209	0.208	0.191	0.181	0.194	0.19	0.176	0.246	0.226	0.207	0.222	0.204	0.194	0.186	0.192	0.201	0.186	0.172	0.168	0.16	0.182
	04:05:06	0.071	0.07	0.071	0.071	0.431	0.43	0.433	0.446	0.431	0.43	0.439	0.442	0.425	0.413	0.438	0.435	0.475	0.445	0.456	0.466	0.445	0.464	0.45	0.418	0.288	0.253	0.246	0.236	0.234	0.218	0.199	0.214	0.216	0.187	0.275	0.256	0.23	0.248	0.228	0.219	0.203	0.213	0.226	0.197	0.185	0.179	0.172	0.196
	04:10:06	0.072	0.071	0.072	0.072	0.434	0.431	0.432	0.438	0.427	0.426	0.432	0.44	0.426	0.418	0.433	0.427	0.461	0.436	0.444	0.452	0.437	0.456	0.441	0.414	0.3	0.266	0.259	0.248	0.246	0.233	0.212	0.228	0.233	0.21	0.29	0.271	0.246	0.265	0.241	0.233	0.216	0.225	0.24	0.226	0.194	0.194	0.185	0.204
	04:15:06	0.071	0.07	0.071	0.071	0.457	0.452	0.443	0.443	0.434	0.434	0.438	0.445	0.429	0.425	0.441	0.432	0.47	0.446	0.453	0.46	0.448	0.456	0.445	0.419	0.318	0.283	0.273	0.267	0.266	0.247	0.229	0.241	0.247	0.228	0.31	0.289	0.269	0.284	0.264	0.253	0.237	0.244	0.26	0.242	0.199	0.205	0.197	0.211
	04:20:06	0.073	0.072	0.072	0.072	0.473	0.46	0.459	0.466	0.452	0.459	0.458	0.46	0.449	0.444	0.463	0.467	0.511	0.483	0.486	0.5	0.481	0.494	0.48	0.442	0.354	0.324	0.313	0.306	0.304	0.288	0.269	0.281	0.283	0.267	0.341	0.325	0.303	0.319	0.299	0.289	0.272	0.279	0.298	0.275	0.211	0.212	0.203	0.222
	04:25:06	0.072	0.071	0.071	0.072	0.458	0.454	0.458	0.472	0.454	0.458	0.463	0.459	0.449	0.439	0.468	0.462	0.515	0.479	0.487	0.5	0.475	0.487	0.478	0.44	0.375	0.331	0.317	0.31	0.31	0.297	0.281	0.297	0.303	0.276	0.361	0.336	0.311	0.326	0.308	0.307	0.285	0.299	0.319	0.285	0.222	0.221	0.212	0.233
	04:30:06	0.072	0.071	0.071	0.071	0.471	0.467	0.462	0.477	0.461	0.463	0.469	0.466	0.46	0.454	0.474	0.471	0.524	0.491	0.5	0.51	0.491	0.497	0.491	0.453	0.36	0.349	0.344	0.331	0.331	0.32	0.31	0.319	0.316	0.296	0.356	0.357	0.333	0.347	0.329	0.33	0.314	0.326	0.33	0.31	0.233	0.233	0.222	0.245
	04:35:06	0.073	0.072	0.072	0.072	0.481	0.474	0.473	0.487	0.472	0.47	0.486	0.474	0.473	0.462	0.485	0.484	0.539	0.506	0.513	0.52	0.499	0.51	0.505	0.465	0.365	0.368	0.354	0.356	0.36	0.336	0.318	0.336	0.342	0.324	0.362	0.361	0.36	0.356	0.353	0.346	0.325	0.34	0.352	0.334	0.244	0.245	0.233	0.254
	04:40:06	0.071	0.071	0.071	0.071	0.487	0.479	0.477	0.484	0.47	0.467	0.48	0.475	0.471	0.466	0.483	0.479	0.54	0.503	0.514	0.52	0.511	0.505	0.512	0.46	0.36	0.353	0.34	0.341	0.347	0.349	0.329	0.346	0.356	0.329	0.359	0.35	0.353	0.348	0.352	0.368	0.342	0.349	0.366	0.344	0.253	0.257	0.243	0.263
	04:45:06	0.072	0.071	0.071	0.071	0.5	0.491	0.484	0.494	0.481	0.48	0.493	0.486	0.485	0.484	0.496	0.495	0.557	0.521	0.527	0.533	0.528	0.519	0.527	0.477	0.366	0.354	0.341	0.338	0.34	0.345	0.343	0.374	0.353	0.358	0.365	0.35	0.349	0.347	0.346	0.36	0.355	0.383	0.359	0.369	0.263	0.269	0.255	0.273
	04:50:06	0.073	0.072	0.073	0.072	0.52	0.509	0.498	0.515	0.496	0.499	0.513	0.5	0.503	0.494	0.514	0.517	0.584	0.549	0.553	0.558	0.553	0.549	0.545	0.496	0.388	0.361	0.352	0.349	0.349	0.35	0.345	0.394	0.357	0.361	0.361	0.36	0.357	0.36	0.35	0.359	0.347	0.383	0.362	0.367	0.271	0.281	0.27	0.283
	04:55:06	0.073	0.072	0.072	0.072	0.544	0.525	0.516	0.528	0.507	0.508	0.519	0.511	0.517	0.511	0.526	0.528	0.593	0.555	0.562	0.573	0.567	0.558	0.564	0.502	0.38	0.363	0.355	0.351	0.354	0.35	0.345	0.379	0.357	0.358	0.378	0.368	0.361	0.361	0.353	0.363	0.347	0.376	0.365	0.368	0.281	0.288	0.276	0.29
	05:00:06	0.072	0.071	0.071	0.071	0.565	0.535	0.517	0.532	0.513	0.515	0.527	0.515	0.53	0.522	0.533	0.533	0.605	0.564	0.571	0.579	0.583	0.564	0.575	0.515	0.377	0.37	0.368	0.393	0.356	0.351	0.343	0.377	0.36	0.354	0.377	0.374	0.363	0.406	0.356	0.364	0.35	0.377	0.367	0.365	0.291	0.297	0.284	0.301
	05:05:06	0.074	0.072	0.072	0.073	0.575	0.551	0.532	0.549	0.524	0.525	0.537	0.524	0.542	0.538	0.544	0.545	0.624	0.579	0.581	0.591	0.598	0.575	0.593	0.524	0.382	0.376	0.368	0.364	0.368	0.384	0.352	0.388	0.345	0.357	0.38	0.377	0.396	0.374	0.371	0.365	0.358	0.386	0.361	0.366	0.302	0.308	0.295	0.313
	05:10:06	0.073	0.072	0.072	0.073	0.606	0.564	0.542	0.555	0.534	0.534	0.546	0.535	0.564	0.556	0.552	0.558	0.635	0.586	0.589	0.597	0.611	0.583	0.614	0.543	0.382	0.38	0.37	0.368	0.372	0.368	0.398	0.389	0.371	0.392	0.378	0.378	0.383	0.376	0.374	0.383	0.377	0.387	0.383	0.366	0.31	0.319	0.306	0.323
	05:15:06	0.072	0.071	0.071	0.072	0.612	0.588	0.556	0.582	0.556	0.554	0.569	0.556	0.579	0.574	0.573	0.583	0.661	0.613	0.619	0.628	0.635	0.613	0.635	0.56	0.386	0.382	0.37	0.365	0.372	0.366	0.362	0.391	0.373	0.374	0.384	0.379	0.381	0.377	0.375	0.382	0.365	0.39	0.387	0.386	0.319	0.328	0.314	0.331
	05:20:06	0.072	0.071	0.071	0.072	0.621	0.606	0.568	0.589	0.566	0.573	0.585	0.568	0.598	0.591	0.584	0.594	0.671	0.621	0.623	0.627	0.648	0.617	0.657	0.586	0.399	0.39	0.377	0.378	0.38	0.375	0.365	0.399	0.377	0.37	0.387	0.384	0.388	0.382	0.386	0.387	0.373	0.394	0.389	0.386	0.326	0.338	0.325	0.341
	05:25:06	0.073	0.072	0.072	0.073	0.645	0.621	0.583	0.608	0.581	0.586	0.602	0.582	0.614	0.611	0.599	0.612	0.696	0.645	0.643	0.655	0.672	0.645	0.67	0.599	0.397	0.39	0.382	0.381	0.387	0.382	0.374	0.404	0.389	0.379	0.391	0.389	0.397	0.393	0.392	0.395	0.378	0.396	0.393	0.395	0.339	0.35	0.338	0.354
	05:30:06	0.072	0.071	0.071	0.072	0.654	0.625	0.587	0.617	0.583	0.591	0.612	0.586	0.626	0.617	0.607	0.625	0.704	0.65	0.652	0.665	0.684	0.652	0.684	0.608	0.398	0.389	0.383	0.384	0.383	0.379	0.373	0.402	0.388	0.379	0.393	0.391	0.393	0.389	0.389	0.393	0.377	0.402	0.394	0.39	0.348	0.358	0.346	0.361
	05:35:06	0.071	0.071	0.072	0.071	0.674	0.649	0.599	0.637	0.599	0.605	0.632	0.605	0.649	0.639	0.624	0.647	0.732	0.678	0.679	0.685	0.701	0.677	0.719	0.629	0.402	0.394	0.389	0.387	0.392	0.385	0.376	0.404	0.39	0.383	0.398	0.395	0.396	0.395	0.39	0.397	0.381	0.404	0.399	0.393	0.357	0.367	0.355	0.37
	05:40:06	0.072	0.071	0.072	0.072	0.686	0.665	0.62	0.649	0.617	0.618	0.65	0.625	0.658	0.654	0.641	0.66	0.744	0.694	0.692	0.696	0.715	0.691	0.729	0.638	0.408	0.4	0.396	0.389	0.394	0.387	0.385	0.411	0.391	0.383	0.402	0.399	0.4	0.403	0.389	0.398	0.383	0.406	0.399	0.389	0.368	0.376	0.364	0.379
	05:45:06	0.076	0.073	0.073	0.073	0.687	0.655	0.624	0.655	0.613	0.618	0.649	0.622	0.669	0.665	0.634	0.663	0.747	0.694	0.695	0.704	0.722	0.7	0.734	0.647	0.418	0.404	0.404	0.406	0.407	0.403	0.392	0.422	0.4	0.386	0.411	0.413	0.416	0.415	0.407	0.414	0.396	0.422	0.415	0.398	0.381	0.389	0.377	0.392
	05:50:06	0.074	0.072	0.073	0.073	0.724	0.699	0.651	0.688	0.648	0.65	0.683	0.656	0.705	0.697	0.669	0.697	0.767	0.715	0.727	0.739	0.745	0.73	0.764	0.679	0.424	0.412	0.406	0.403	0.407	0.402	0.393	0.425	0.399	0.392	0.42	0.417	0.425	0.422	0.407	0.415	0.397	0.421	0.412	0.407	0.392	0.398	0.386	0.4
	05:55:06	0.071	0.071	0.072	0.071	0.725	0.697	0.638	0.676	0.643	0.644	0.678	0.656	0.709	0.698	0.666	0.698	0.772	0.716	0.726	0.728	0.751	0.725	0.772	0.686	0.426	0.42	0.409	0.409	0.414	0.402	0.398	0.429	0.401	0.388	0.421	0.42	0.427	0.421	0.408	0.416	0.398	0.426	0.415	0.399	0.402	0.404	0.39	0.404
	06:00:06	0.071	0.071	0.071	0.071	0.758	0.742	0.675	0.717	0.684	0.681	0.714	0.699	0.739	0.733	0.695	0.727	0.789	0.741	0.756	0.757	0.764	0.756	0.793	0.715	0.442	0.426	0.417	0.414	0.414	0.406	0.401	0.435	0.408	0.399	0.436	0.427	0.436	0.437	0.416	0.426	0.411	0.43	0.425	0.417	0.415	0.417	0.403	0.415
	06:05:06	0.072	0.071	0.071	0.072	0.756	0.734	0.678	0.719	0.677	0.674	0.716	0.691	0.741	0.733	0.702	0.739	0.803	0.749	0.766	0.767	0.782	0.765	0.805	0.725	0.445	0.429	0.417	0.416	0.417	0.411	0.402	0.435	0.411	0.4	0.44	0.43	0.439	0.437	0.418	0.426	0.406	0.43	0.426	0.416	0.419	0.426	0.411	0.426
	06:10:06	0.073	0.072	0.073	0.073	0.795	0.758	0.699	0.744	0.697	0.704	0.735	0.718	0.762	0.764	0.717	0.755	0.815	0.764	0.784	0.778	0.794	0.787	0.815	0.744	0.455	0.437	0.427	0.432	0.428	0.421	0.415	0.454	0.425	0.41	0.454	0.441	0.453	0.449	0.431	0.444	0.42	0.444	0.437	0.43	0.426	0.443	0.422	0.436
	06:15:06	0.072	0.071	0.071	0.071	0.803	0.776	0.71	0.757	0.717	0.717	0.754	0.733	0.781	0.774	0.74	0.773	0.827	0.775	0.796	0.794	0.803	0.799	0.837	0.757	0.472	0.45	0.436	0.435	0.433	0.428	0.416	0.45	0.433	0.423	0.469	0.457	0.462	0.463	0.44	0.448	0.429	0.45	0.452	0.44	0.427	0.449	0.431	0.437
	06:20:06	0.073	0.072	0.074	0.073	0.808	0.797	0.718	0.772	0.734	0.73	0.767	0.752	0.813	0.805	0.744	0.782	0.84	0.788	0.812	0.803	0.816	0.813	0.855	0.786	0.477	0.458	0.448	0.44	0.44	0.435	0.426	0.459	0.439	0.424	0.477	0.463	0.465	0.466	0.449	0.453	0.437	0.459	0.454	0.448	0.429	0.454	0.438	0.443
	06:25:06	0.073	0.072	0.073	0.073	0.832	0.814	0.735	0.786	0.746	0.74	0.778	0.762	0.822	0.814	0.755	0.792	0.841	0.791	0.814	0.81	0.823	0.825	0.872	0.802	0.496	0.468	0.455	0.446	0.446	0.441	0.431	0.464	0.451	0.435	0.491	0.474	0.473	0.473	0.45	0.459	0.439	0.458	0.468	0.457	0.431	0.459	0.442	0.449
	06:30:06	0.072	0.071	0.071	0.072	0.82	0.812	0.737	0.793	0.75	0.752	0.792	0.769	0.836	0.818	0.76	0.797	0.844	0.795	0.824	0.819	0.829	0.831	0.888	0.815	0.503	0.475	0.462	0.46	0.459	0.454	0.439	0.469	0.463	0.447	0.498	0.481	0.488	0.487	0.467	0.47	0.452	0.464	0.48	0.469	0.43	0.464	0.447	0.452
	06:35:06	0.074	0.073	0.073	0.073	0.855	0.837	0.756	0.82	0.775	0.768	0.814	0.795	0.852	0.84	0.786	0.825	0.873	0.826	0.841	0.845	0.848	0.846	0.896	0.827	0.525	0.493	0.481	0.479	0.48	0.465	0.455	0.487	0.481	0.464	0.518	0.5	0.508	0.507	0.486	0.489	0.47	0.485	0.499	0.48	0.436	0.468	0.453	0.457
	06:40:06	0.074	0.073	0.073	0.073	0.855	0.852	0.762	0.827	0.782	0.774	0.827	0.815	0.858	0.858	0.796	0.838	0.888	0.84	0.857	0.849	0.862	0.864	0.909	0.847	0.537	0.501	0.483	0.479	0.48	0.47	0.46	0.492	0.487	0.472	0.53	0.505	0.516	0.512	0.487	0.492	0.474	0.484	0.502	0.488	0.437	0.47	0.454	0.457
	06:45:06	0.074	0.073	0.073	0.074	0.878	0.873	0.787	0.843	0.799	0.799	0.84	0.829	0.866	0.863	0.814	0.853	0.898	0.854	0.868	0.859	0.874	0.872	0.922	0.857	0.555	0.516	0.498	0.492	0.496	0.481	0.47	0.504	0.503	0.487	0.544	0.522	0.533	0.524	0.502	0.509	0.492	0.501	0.52	0.504	0.443	0.474	0.458	0.461
	06:50:06	0.073	0.073	0.073	0.073	0.898	0.885	0.8	0.854	0.819	0.813	0.844	0.846	0.882	0.874	0.825	0.86	0.908	0.864	0.883	0.873	0.885	0.888	0.925	0.866	0.58	0.527	0.504	0.502	0.504	0.492	0.48	0.51	0.514	0.495	0.564	0.535	0.547	0.537	0.515	0.515	0.498	0.507	0.535	0.525	0.45	0.475	0.461	0.466
	06:55:06	0.072	0.072	0.072	0.072	0.905	0.893	0.811	0.867	0.831	0.826	0.858	0.86	0.892	0.884	0.833	0.866	0.908	0.866	0.889	0.882	0.892	0.9	0.938	0.875	0.59	0.542	0.518	0.516	0.517	0.507	0.492	0.526	0.527	0.509	0.578	0.55	0.565	0.552	0.525	0.531	0.513	0.523	0.548	0.53	0.452	0.478	0.464	0.468
	07:00:06	0.072	0.072	0.072	0.072	0.908	0.899	0.82	0.878	0.839	0.836	0.865	0.87	0.9	0.891	0.843	0.878	0.92	0.876	0.899	0.896	0.903	0.911	0.948	0.885	0.61	0.552	0.528	0.526	0.529	0.516	0.507	0.539	0.54	0.519	0.591	0.565	0.581	0.568	0.539	0.541	0.523	0.535	0.564	0.547	0.455	0.479	0.465	0.47
	07:05:06	0.075	0.073	0.074	0.073	0.927	0.915	0.832	0.889	0.853	0.846	0.878	0.885	0.919	0.908	0.856	0.897	0.941	0.896	0.916	0.909	0.919	0.927	0.962	0.902	0.63	0.565	0.538	0.537	0.54	0.525	0.513	0.548	0.556	0.535	0.608	0.577	0.595	0.581	0.55	0.549	0.53	0.54	0.581	0.566	0.463	0.486	0.471	0.478
	07:10:06	0.071	0.071	0.072	0.072	0.933	0.926	0.845	0.91	0.867	0.862	0.9	0.901	0.927	0.918	0.87	0.91	0.951	0.907	0.924	0.922	0.928	0.936	0.972	0.914	0.645	0.589	0.555	0.549	0.552	0.538	0.519	0.559	0.569	0.547	0.626	0.593	0.612	0.599	0.56	0.561	0.546	0.552	0.589	0.568	0.462	0.486	0.472	0.481
	07:15:06	0.073	0.073	0.073	0.074	0.951	0.942	0.863	0.926	0.89	0.883	0.919	0.924	0.939	0.929	0.885	0.923	0.965	0.92	0.937	0.933	0.939	0.955	0.982	0.924	0.666	0.603	0.562	0.557	0.562	0.554	0.539	0.577	0.583	0.564	0.65	0.608	0.622	0.618	0.575	0.573	0.562	0.562	0.613	0.599	0.467	0.493	0.48	0.486
	07:20:06	0.072	0.071	0.072	0.072	0.938	0.942	0.852	0.925	0.879	0.877	0.922	0.925	0.943	0.922	0.886	0.927	0.971	0.924	0.945	0.939	0.95	0.965	0.996	0.934	0.668	0.608	0.574	0.57	0.574	0.555	0.543	0.576	0.591	0.568	0.657	0.623	0.647	0.628	0.582	0.584	0.566	0.564	0.618	0.592	0.464	0.493	0.479	0.484
	07:25:06	0.073	0.073	0.074	0.073	0.967	0.959	0.877	0.943	0.908	0.899	0.938	0.943	0.955	0.95	0.902	0.94	0.986	0.941	0.955	0.952	0.96	0.971	0.997	0.941	0.694	0.632	0.592	0.589	0.596	0.576	0.565	0.601	0.619	0.594	0.68	0.643	0.661	0.651	0.607	0.603	0.585	0.587	0.65	0.629	0.474	0.502	0.488	0.492
	07:30:06	0.071	0.072	0.072	0.072	0.96	0.971	0.892	0.953	0.92	0.911	0.947	0.955	0.964	0.955	0.911	0.95	0.991	0.947	0.963	0.962	0.969	0.982	1.01	0.953	0.711	0.653	0.606	0.604	0.611	0.593	0.579	0.612	0.635	0.613	0.696	0.661	0.674	0.667	0.624	0.62	0.607	0.604	0.668	0.644	0.478	0.505	0.492	0.497
	07:35:06	0.071	0.072	0.072	0.072	0.962	0.978	0.89	0.959	0.925	0.915	0.955	0.968	0.978	0.962	0.92	0.953	1.002	0.959	0.971	0.965	0.978	0.998	1.021	0.968	0.718	0.659	0.612	0.611	0.619	0.602	0.587	0.621	0.648	0.622	0.706	0.669	0.687	0.676	0.632	0.632	0.613	0.61	0.68	0.653	0.479	0.507	0.493	0.498
	07:40:06	0.071	0.071	0.072	0.072	0.96	0.986	0.895	0.966	0.931	0.926	0.966	0.981	0.985	0.962	0.93	0.965	1.01	0.967	0.982	0.976	0.986	1.01	1.032	0.976	0.737	0.672	0.623	0.624	0.633	0.604	0.588	0.624	0.662	0.635	0.721	0.689	0.708	0.692	0.647	0.639	0.622	0.61	0.697	0.669	0.481	0.508	0.494	0.499
	07:45:06	0.073	0.073	0.073	0.074	0.997	0.997	0.923	0.986	0.956	0.948	0.98	0.999	0.991	0.986	0.941	0.982	1.021	0.978	0.995	0.991	1.001	1.023	1.04	0.98	0.755	0.703	0.642	0.642	0.652	0.638	0.621	0.656	0.688	0.664	0.739	0.701	0.718	0.708	0.669	0.663	0.649	0.636	0.721	0.699	0.49	0.516	0.502	0.507
	07:50:06	0.071	0.071	0.072	0.072	0.989	1.006	0.93	0.992	0.966	0.955	0.987	1.007	0.998	0.989	0.946	0.984	1.024	0.982	1	0.997	1.004	1.029	1.043	0.983	0.772	0.716	0.658	0.657	0.67	0.643	0.633	0.665	0.706	0.681	0.75	0.721	0.738	0.721	0.683	0.681	0.662	0.652	0.741	0.717	0.493	0.52	0.505	0.51
	07:55:06	0.073	0.073	0.074	0.074	1.012	1.007	0.923	0.989	0.962	0.946	0.989	1.013	1.008	1.004	0.961	0.995	1.038	0.999	1.013	1	1.016	1.048	1.058	0.998	0.775	0.711	0.653	0.653	0.666	0.646	0.633	0.666	0.703	0.673	0.763	0.728	0.75	0.734	0.688	0.674	0.663	0.65	0.737	0.708	0.494	0.524	0.509	0.515
	08:00:06	0.072	0.072	0.072	0.072	1.003	1.025	0.939	1.007	0.978	0.97	1.006	1.031	1.021	1.013	0.961	1	1.031	0.993	1.016	1.005	1.025	1.056	1.071	1.012	0.792	0.734	0.676	0.678	0.69	0.662	0.65	0.688	0.724	0.697	0.777	0.738	0.759	0.74	0.703	0.701	0.68	0.671	0.762	0.729	0.498	0.526	0.511	0.517
	08:05:06	0.072	0.072	0.072	0.073	1.027	1.03	0.958	1.016	0.991	0.98	1.014	1.045	1.029	1.02	0.969	1.009	1.046	1.007	1.023	1.015	1.028	1.057	1.069	1.015	0.813	0.758	0.687	0.686	0.699	0.681	0.664	0.697	0.743	0.715	0.793	0.756	0.771	0.765	0.725	0.71	0.701	0.683	0.778	0.751	0.505	0.532	0.517	0.522
	08:10:06	0.074	0.073	0.074	0.074	1.027	1.039	0.978	1.029	1.002	0.999	1.027	1.057	1.034	1.019	0.978	1.019	1.052	1.013	1.03	1.027	1.037	1.069	1.072	1.022	0.826	0.773	0.7	0.702	0.718	0.696	0.683	0.723	0.763	0.736	0.804	0.773	0.79	0.775	0.74	0.732	0.717	0.707	0.798	0.773	0.508	0.534	0.519	0.524
	08:15:06	0.074	0.073	0.073	0.074	1.032	1.042	0.977	1.029	1.01	1.002	1.032	1.066	1.038	1.028	0.989	1.024	1.065	1.025	1.039	1.036	1.042	1.08	1.079	1.024	0.836	0.785	0.718	0.717	0.734	0.712	0.7	0.732	0.776	0.748	0.818	0.79	0.807	0.789	0.754	0.746	0.731	0.721	0.811	0.789	0.516	0.542	0.527	0.532
	08:20:06	0.073	0.073	0.074	0.074	1.047	1.054	0.991	1.041	1.018	1.014	1.042	1.079	1.05	1.033	0.998	1.035	1.071	1.032	1.047	1.043	1.049	1.09	1.089	1.037	0.849	0.8	0.725	0.723	0.74	0.722	0.707	0.747	0.789	0.762	0.834	0.8	0.818	0.806	0.763	0.751	0.742	0.724	0.824	0.8	0.515	0.542	0.526	0.532
	08:25:06	0.072	0.072	0.073	0.073	1.05	1.058	0.994	1.046	1.024	1.015	1.044	1.084	1.052	1.046	1	1.036	1.074	1.036	1.053	1.046	1.054	1.099	1.095	1.039	0.856	0.807	0.732	0.736	0.753	0.728	0.717	0.752	0.801	0.772	0.841	0.811	0.829	0.813	0.772	0.768	0.752	0.741	0.84	0.806	0.519	0.546	0.53	0.535
	08:30:06	0.072	0.072	0.072	0.073	1.059	1.068	1.006	1.054	1.035	1.026	1.052	1.091	1.058	1.048	1.007	1.046	1.076	1.04	1.058	1.055	1.064	1.107	1.102	1.047	0.864	0.828	0.75	0.748	0.764	0.745	0.733	0.766	0.818	0.791	0.851	0.822	0.838	0.826	0.788	0.78	0.769	0.758	0.853	0.828	0.527	0.552	0.537	0.542
	08:35:06	0.074	0.073	0.074	0.074	1.065	1.079	1.023	1.066	1.043	1.04	1.06	1.102	1.064	1.049	1.018	1.056	1.087	1.05	1.065	1.064	1.068	1.115	1.104	1.052	0.876	0.836	0.763	0.764	0.781	0.764	0.751	0.785	0.832	0.808	0.859	0.841	0.856	0.839	0.806	0.801	0.788	0.777	0.864	0.843	0.528	0.552	0.537	0.542
	08:40:06	0.074	0.073	0.074	0.074	1.063	1.077	1.021	1.059	1.047	1.039	1.062	1.106	1.063	1.05	1.022	1.05	1.086	1.05	1.061	1.065	1.068	1.122	1.104	1.051	0.887	0.845	0.779	0.78	0.798	0.781	0.764	0.802	0.842	0.819	0.869	0.854	0.87	0.85	0.823	0.817	0.803	0.791	0.875	0.853	0.536	0.56	0.545	0.55
	08:45:06	0.072	0.072	0.072	0.073	1.064	1.084	1.032	1.071	1.054	1.05	1.069	1.11	1.074	1.066	1.029	1.06	1.087	1.051	1.072	1.071	1.073	1.13	1.115	1.062	0.898	0.847	0.772	0.776	0.796	0.774	0.761	0.809	0.849	0.823	0.876	0.857	0.873	0.857	0.825	0.819	0.807	0.797	0.883	0.857	0.537	0.561	0.545	0.551
	08:50:06	0.074	0.073	0.073	0.074	1.077	1.09	1.045	1.077	1.068	1.059	1.077	1.124	1.074	1.059	1.043	1.071	1.1	1.064	1.074	1.082	1.078	1.136	1.113	1.061	0.903	0.875	0.806	0.806	0.825	0.808	0.797	0.83	0.864	0.838	0.888	0.875	0.89	0.871	0.84	0.841	0.834	0.817	0.894	0.87	0.548	0.565	0.551	0.555
	08:55:06	0.074	0.073	0.074	0.074	1.067	1.09	1.046	1.076	1.062	1.06	1.076	1.119	1.083	1.067	1.038	1.07	1.095	1.06	1.077	1.083	1.076	1.137	1.117	1.07	0.916	0.882	0.811	0.805	0.827	0.806	0.795	0.84	0.875	0.846	0.897	0.88	0.893	0.877	0.85	0.84	0.838	0.824	0.903	0.876	0.547	0.567	0.552	0.557
	09:00:06	0.074	0.074	0.074	0.074	1.09	1.095	1.059	1.086	1.077	1.068	1.086	1.135	1.087	1.076	1.044	1.078	1.105	1.071	1.088	1.094	1.084	1.148	1.122	1.074	0.925	0.892	0.823	0.819	0.84	0.82	0.815	0.844	0.885	0.86	0.909	0.894	0.91	0.895	0.863	0.857	0.85	0.833	0.92	0.89	0.557	0.577	0.562	0.567
	09:05:06	0.073	0.073	0.074	0.074	1.089	1.101	1.067	1.095	1.083	1.078	1.093	1.131	1.096	1.083	1.054	1.089	1.106	1.071	1.092	1.101	1.091	1.148	1.129	1.079	0.938	0.908	0.849	0.845	0.862	0.842	0.832	0.863	0.898	0.869	0.916	0.907	0.922	0.903	0.878	0.875	0.868	0.852	0.931	0.899	0.559	0.58	0.565	0.57
	09:10:06	0.074	0.074	0.074	0.074	1.088	1.102	1.07	1.097	1.088	1.085	1.099	1.143	1.1	1.084	1.057	1.088	1.113	1.078	1.093	1.101	1.092	1.156	1.127	1.087	0.94	0.914	0.847	0.848	0.865	0.848	0.834	0.871	0.904	0.88	0.924	0.916	0.927	0.913	0.887	0.886	0.878	0.863	0.944	0.914	0.561	0.58	0.564	0.569
	09:15:06	0.075	0.074	0.074	0.075	1.096	1.105	1.072	1.102	1.093	1.084	1.106	1.152	1.106	1.097	1.057	1.092	1.114	1.078	1.099	1.106	1.095	1.169	1.136	1.094	0.957	0.921	0.845	0.845	0.867	0.858	0.843	0.889	0.923	0.896	0.941	0.93	0.943	0.933	0.903	0.898	0.89	0.874	0.955	0.923	0.565	0.586	0.571	0.575
	09:20:06	0.074	0.073	0.074	0.074	1.096	1.11	1.082	1.11	1.093	1.089	1.11	1.151	1.116	1.099	1.061	1.1	1.125	1.092	1.113	1.12	1.103	1.167	1.145	1.106	0.96	0.944	0.879	0.875	0.894	0.873	0.863	0.903	0.934	0.905	0.947	0.941	0.952	0.937	0.913	0.913	0.908	0.89	0.965	0.932	0.576	0.594	0.578	0.583
	09:25:06	0.074	0.074	0.074	0.075	1.092	1.116	1.08	1.11	1.101	1.091	1.114	1.159	1.111	1.101	1.065	1.099	1.123	1.089	1.104	1.114	1.102	1.179	1.143	1.098	0.968	0.941	0.876	0.876	0.894	0.881	0.867	0.91	0.938	0.911	0.953	0.948	0.962	0.946	0.923	0.921	0.913	0.899	0.975	0.941	0.581	0.598	0.582	0.588
	09:30:06	0.074	0.074	0.074	0.074	1.097	1.108	1.088	1.111	1.099	1.094	1.112	1.155	1.112	1.1	1.066	1.106	1.13	1.097	1.119	1.125	1.104	1.175	1.142	1.11	0.973	0.958	0.897	0.895	0.913	0.893	0.888	0.921	0.948	0.919	0.96	0.956	0.97	0.954	0.929	0.93	0.925	0.908	0.979	0.943	0.587	0.604	0.588	0.594
	09:35:06	0.072	0.072	0.072	0.073	1.087	1.114	1.086	1.112	1.107	1.097	1.117	1.159	1.114	1.102	1.069	1.103	1.125	1.095	1.114	1.119	1.11	1.173	1.143	1.107	0.977	0.963	0.908	0.905	0.919	0.9	0.897	0.928	0.953	0.926	0.96	0.958	0.971	0.955	0.933	0.937	0.931	0.919	0.986	0.95	0.587	0.606	0.589	0.594
	09:40:06	0.075	0.074	0.074	0.075	1.092	1.113	1.088	1.111	1.106	1.097	1.119	1.162	1.111	1.101	1.07	1.102	1.131	1.1	1.114	1.117	1.112	1.184	1.143	1.107	0.984	0.967	0.913	0.909	0.927	0.914	0.905	0.941	0.962	0.937	0.97	0.969	0.985	0.97	0.945	0.951	0.941	0.93	0.999	0.964	0.598	0.614	0.599	0.604
	09:45:06	0.074	0.074	0.075	0.074	1.095	1.119	1.093	1.12	1.117	1.106	1.127	1.168	1.121	1.107	1.077	1.113	1.14	1.108	1.122	1.127	1.115	1.19	1.158	1.118	1	0.985	0.924	0.923	0.943	0.93	0.921	0.96	0.979	0.951	0.986	0.986	1	0.984	0.964	0.967	0.959	0.946	1.016	0.979	0.593	0.614	0.597	0.604
	09:50:06	0.072	0.072	0.073	0.073	1.086	1.119	1.097	1.12	1.119	1.107	1.132	1.163	1.124	1.107	1.085	1.113	1.143	1.113	1.129	1.135	1.123	1.186	1.145	1.118	1.006	0.995	0.936	0.934	0.952	0.935	0.927	0.968	0.984	0.953	0.987	0.986	1.002	0.984	0.967	0.974	0.969	0.956	1.014	0.977	0.599	0.62	0.605	0.611
	09:55:06	0.072	0.072	0.073	0.073	1.081	1.124	1.098	1.125	1.118	1.109	1.136	1.164	1.126	1.106	1.081	1.113	1.141	1.111	1.125	1.127	1.122	1.189	1.154	1.118	1.009	0.999	0.938	0.93	0.949	0.933	0.921	0.972	0.992	0.965	0.993	0.993	1.006	0.988	0.97	0.973	0.972	0.96	1.021	0.987	0.604	0.623	0.608	0.614
	10:00:06	0.074	0.074	0.074	0.075	1.093	1.117	1.099	1.125	1.122	1.11	1.133	1.161	1.127	1.109	1.085	1.117	1.149	1.121	1.133	1.132	1.125	1.187	1.146	1.119	1.014	1.008	0.958	0.952	0.969	0.951	0.948	0.988	0.998	0.969	1.002	1.004	1.019	1.004	0.984	0.991	0.987	0.976	1.03	0.993	0.617	0.631	0.616	0.621
	10:05:06	0.072	0.072	0.073	0.073	1.089	1.117	1.102	1.127	1.118	1.111	1.135	1.16	1.128	1.106	1.081	1.117	1.145	1.118	1.136	1.138	1.129	1.193	1.153	1.125	1.019	1.014	0.963	0.964	0.978	0.958	0.953	1	1.008	0.978	1.005	1.01	1.024	1.007	0.989	0.996	0.994	0.989	1.038	0.999	0.615	0.636	0.621	0.625
	10:10:06	0.072	0.072	0.074	0.073	1.087	1.119	1.104	1.128	1.121	1.111	1.133	1.156	1.125	1.097	1.08	1.118	1.147	1.121	1.133	1.14	1.128	1.186	1.147	1.114	1.018	1.016	0.97	0.968	0.982	0.969	0.963	1.005	1.009	0.981	1.008	1.011	1.027	1.012	0.992	1.004	0.998	0.995	1.041	1.001	0.623	0.642	0.625	0.631
	10:15:06	0.073	0.074	0.075	0.074	1.085	1.113	1.105	1.124	1.124	1.113	1.13	1.16	1.116	1.094	1.086	1.118	1.146	1.12	1.134	1.135	1.129	1.198	1.151	1.108	1.03	1.025	0.979	0.976	0.992	0.981	0.976	1.017	1.019	0.99	1.017	1.021	1.037	1.021	1.006	1.015	1.008	1.008	1.047	1.009	0.631	0.647	0.629	0.637
	10:20:06	0.072	0.073	0.073	0.073	1.082	1.111	1.103	1.129	1.12	1.116	1.135	1.152	1.122	1.095	1.081	1.119	1.142	1.118	1.132	1.14	1.141	1.19	1.16	1.11	1.034	1.029	0.986	0.985	1	0.989	0.981	1.032	1.026	0.996	1.021	1.028	1.042	1.026	1.012	1.023	1.017	1.018	1.056	1.017	0.626	0.643	0.626	0.633
	10:25:06	0.072	0.072	0.073	0.073	1.08	1.106	1.106	1.121	1.123	1.113	1.13	1.143	1.118	1.09	1.087	1.114	1.143	1.119	1.131	1.136	1.129	1.185	1.141	1.112	1.04	1.036	0.997	0.993	1.008	0.996	0.99	1.039	1.026	0.999	1.025	1.031	1.046	1.031	1.017	1.029	1.021	1.027	1.056	1.023	0.634	0.652	0.635	0.642
	10:30:06	0.072	0.072	0.073	0.073	1.078	1.108	1.112	1.125	1.123	1.116	1.134	1.142	1.121	1.092	1.088	1.121	1.147	1.122	1.138	1.142	1.131	1.186	1.151	1.115	1.048	1.046	1	0.997	1.015	1	0.993	1.05	1.038	1.007	1.038	1.043	1.055	1.039	1.027	1.037	1.034	1.038	1.071	1.031	0.634	0.655	0.637	0.645
	10:35:06	0.072	0.072	0.074	0.073	1.083	1.109	1.113	1.127	1.124	1.117	1.137	1.128	1.118	1.087	1.087	1.126	1.15	1.126	1.14	1.148	1.135	1.182	1.148	1.108	1.047	1.051	1.011	1.008	1.025	1.01	1.004	1.056	1.042	1.015	1.039	1.05	1.062	1.044	1.033	1.046	1.04	1.043	1.076	1.038	0.641	0.66	0.642	0.649
	10:40:06	0.072	0.072	0.074	0.073	1.082	1.106	1.111	1.127	1.123	1.115	1.135	1.114	1.116	1.087	1.09	1.129	1.152	1.129	1.139	1.147	1.139	1.174	1.156	1.107	1.056	1.064	1.022	1.017	1.034	1.023	1.017	1.068	1.051	1.021	1.046	1.056	1.071	1.053	1.042	1.055	1.049	1.056	1.084	1.041	0.638	0.662	0.643	0.651
	10:45:06	0.074	0.074	0.074	0.075	1.082	1.104	1.118	1.124	1.121	1.112	1.128	1.107	1.11	1.08	1.087	1.124	1.149	1.129	1.136	1.148	1.127	1.174	1.137	1.096	1.062	1.066	1.025	1.023	1.037	1.028	1.021	1.069	1.051	1.025	1.054	1.065	1.075	1.057	1.046	1.061	1.055	1.056	1.085	1.045	0.656	0.676	0.655	0.664
	10:50:06	0.072	0.073	0.074	0.073	1.072	1.103	1.114	1.127	1.127	1.117	1.129	1.096	1.109	1.081	1.087	1.123	1.148	1.124	1.138	1.145	1.139	1.172	1.15	1.098	1.073	1.067	1.028	1.03	1.044	1.034	1.028	1.081	1.062	1.035	1.054	1.061	1.072	1.057	1.048	1.063	1.059	1.068	1.093	1.052	0.648	0.67	0.654	0.661
	10:55:06	0.072	0.072	0.074	0.073	1.076	1.1	1.116	1.122	1.122	1.112	1.123	1.09	1.104	1.079	1.09	1.13	1.151	1.132	1.145	1.156	1.136	1.165	1.148	1.094	1.073	1.072	1.031	1.031	1.046	1.038	1.031	1.088	1.066	1.04	1.056	1.065	1.078	1.06	1.055	1.067	1.064	1.075	1.099	1.06	0.654	0.676	0.658	0.667
	11:00:06	0.074	0.074	0.075	0.074	1.08	1.094	1.114	1.12	1.117	1.108	1.119	1.08	1.105	1.079	1.084	1.125	1.149	1.129	1.135	1.144	1.128	1.152	1.135	1.094	1.072	1.076	1.045	1.045	1.06	1.052	1.044	1.086	1.072	1.044	1.067	1.079	1.089	1.073	1.063	1.08	1.072	1.076	1.101	1.063	0.664	0.688	0.667	0.675
	11:05:06	0.075	0.074	0.074	0.075	1.087	1.098	1.116	1.12	1.122	1.109	1.124	1.083	1.103	1.078	1.09	1.13	1.156	1.134	1.143	1.147	1.132	1.155	1.138	1.093	1.077	1.089	1.055	1.052	1.067	1.06	1.053	1.097	1.078	1.05	1.074	1.087	1.096	1.08	1.073	1.091	1.081	1.087	1.113	1.068	0.67	0.693	0.671	0.677
	11:10:06	0.072	0.073	0.074	0.073	1.076	1.099	1.115	1.121	1.118	1.108	1.119	1.077	1.101	1.078	1.086	1.126	1.15	1.131	1.137	1.147	1.128	1.142	1.137	1.095	1.08	1.088	1.056	1.055	1.071	1.061	1.058	1.101	1.08	1.054	1.075	1.084	1.093	1.082	1.075	1.098	1.086	1.091	1.115	1.073	0.667	0.693	0.672	0.679
	11:15:06	0.074	0.074	0.075	0.075	1.081	1.093	1.112	1.112	1.116	1.105	1.112	1.072	1.092	1.071	1.085	1.122	1.143	1.126	1.132	1.143	1.119	1.123	1.129	1.082	1.073	1.083	1.054	1.054	1.069	1.067	1.06	1.111	1.081	1.051	1.074	1.088	1.095	1.085	1.083	1.095	1.085	1.1	1.116	1.075	0.684	0.703	0.68	0.688
	11:20:06	0.072	0.072	0.074	0.073	1.078	1.093	1.112	1.119	1.117	1.111	1.117	1.068	1.102	1.084	1.091	1.126	1.154	1.131	1.148	1.152	1.136	1.126	1.142	1.094	1.087	1.089	1.058	1.063	1.076	1.072	1.064	1.117	1.085	1.058	1.078	1.088	1.1	1.085	1.082	1.097	1.089	1.104	1.117	1.08	0.668	0.697	0.676	0.686
	11:25:06	0.074	0.074	0.075	0.075	1.088	1.097	1.115	1.119	1.121	1.112	1.118	1.081	1.1	1.08	1.091	1.124	1.15	1.129	1.134	1.14	1.127	1.125	1.137	1.091	1.088	1.096	1.075	1.073	1.086	1.085	1.072	1.131	1.093	1.067	1.09	1.102	1.11	1.102	1.097	1.111	1.101	1.119	1.127	1.092	0.679	0.702	0.683	0.692
	11:30:06	0.073	0.073	0.073	0.073	1.085	1.09	1.115	1.115	1.111	1.107	1.11	1.067	1.098	1.082	1.089	1.124	1.148	1.128	1.142	1.146	1.128	1.116	1.133	1.089	1.09	1.095	1.076	1.077	1.089	1.093	1.083	1.133	1.099	1.073	1.088	1.106	1.12	1.109	1.102	1.119	1.108	1.12	1.126	1.089	0.682	0.707	0.685	0.692
	11:35:06	0.074	0.074	0.075	0.075	1.078	1.096	1.112	1.116	1.111	1.104	1.103	1.07	1.091	1.074	1.085	1.12	1.138	1.12	1.13	1.142	1.109	1.118	1.128	1.088	1.086	1.099	1.075	1.078	1.092	1.091	1.084	1.143	1.095	1.071	1.088	1.11	1.12	1.109	1.104	1.117	1.109	1.129	1.13	1.093	0.693	0.712	0.696	0.702
	11:40:06	0.074	0.074	0.075	0.075	1.088	1.097	1.11	1.118	1.118	1.105	1.113	1.089	1.099	1.082	1.091	1.123	1.153	1.134	1.135	1.14	1.116	1.118	1.129	1.091	1.091	1.102	1.078	1.083	1.098	1.093	1.088	1.144	1.104	1.077	1.094	1.112	1.128	1.114	1.103	1.123	1.119	1.132	1.129	1.092	0.691	0.717	0.697	0.705
	11:45:06	0.075	0.074	0.074	0.075	1.082	1.097	1.115	1.12	1.117	1.113	1.112	1.082	1.099	1.082	1.097	1.118	1.149	1.13	1.133	1.137	1.115	1.115	1.131	1.093	1.096	1.104	1.08	1.085	1.098	1.098	1.092	1.152	1.102	1.078	1.091	1.108	1.123	1.112	1.11	1.121	1.117	1.141	1.141	1.101	0.685	0.711	0.694	0.703
	11:50:06	0.075	0.075	0.075	0.075	1.086	1.098	1.116	1.117	1.119	1.108	1.109	1.076	1.094	1.075	1.094	1.121	1.145	1.131	1.137	1.143	1.113	1.109	1.127	1.091	1.095	1.109	1.091	1.092	1.105	1.101	1.1	1.157	1.108	1.081	1.095	1.115	1.131	1.115	1.111	1.13	1.123	1.146	1.135	1.102	0.693	0.721	0.703	0.712
	11:55:06	0.075	0.074	0.074	0.075	1.094	1.103	1.116	1.125	1.121	1.112	1.112	1.049	1.098	1.081	1.099	1.126	1.151	1.136	1.144	1.144	1.119	1.107	1.139	1.097	1.097	1.102	1.093	1.092	1.108	1.112	1.099	1.163	1.114	1.086	1.102	1.126	1.141	1.133	1.129	1.143	1.132	1.15	1.149	1.108	0.695	0.724	0.708	0.715
	12:00:06	0.075	0.074	0.074	0.075	1.093	1.1	1.117	1.122	1.121	1.112	1.109	1.078	1.101	1.082	1.102	1.12	1.146	1.129	1.131	1.139	1.106	1.116	1.126	1.097	1.092	1.112	1.1	1.103	1.116	1.112	1.112	1.157	1.108	1.083	1.105	1.121	1.138	1.125	1.121	1.142	1.129	1.148	1.13	1.093	0.705	0.727	0.712	0.72
[truncated: 36 more columns]

## Sheet: WTRep3
	Media	LB	LB+IPTG	LB0N	LB0N+IPTG	LB	LB	LB	LB	LB	LB	LB	LB	LB	LB	LB+IPTG	LB+IPTG	LB+IPTG	LB+IPTG	LB+IPTG	LB+IPTG	LB+IPTG	LB+IPTG	LB+IPTG	LB+IPTG	LB	LB	LB	LB	LB	LB	LB	LB	LB	LB	LB+IPTG	LB+IPTG	LB+IPTG	LB+IPTG	LB+IPTG	LB+IPTG	LB+IPTG	LB+IPTG	LB+IPTG	LB+IPTG	LB0N	LB0N	LB0N	LB0N
	Dilution Factor	Blank	Blank	Blank	Blank	0.001	0.001	0.001	0.001	0.001	0.001	0.001	0.001	0.001	0.001	0.001	0.001	0.001	0.001	0.001	0.001	0.001	0.001	0.001	0.001	1e-05	1e-05	1e-05	1e-05	1e-05	1e-05	1e-05	1e-05	1e-05	1e-05	1e-05	1e-05	1e-05	1e-05	1e-05	1e-05	1e-05	1e-05	1e-05	1e-05	0.001	0.001	0.001	0.001
	Background	N/A	N/A	N/A	N/A	WT	WT	WT	WT	WT	WT	WT	WT	WT	WT	WT	WT	WT	WT	WT	WT	WT	WT	WT	WT	WT	WT	WT	WT	WT	WT	WT	WT	WT	WT	WT	WT	WT	WT	WT	WT	WT	WT	WT	WT	WT	WT	WT	WT
	Ptac	N/A	N/A	N/A	N/A	empty	mltA	mltB	mltC	mltD	mltF	slt70	EcmltE	mltG	rlpA	empty	mltA	mltB	mltC	mltD	mltF	slt70	EcmltE	mltG	rlpA	empty	mltA	mltB	mltC	mltD	mltF	slt70	EcmltE	mltG	rlpA	empty	mltA	mltB	mltC	mltD	mltF	slt70	EcmltE	mltG	rlpA	empty	mltA	mltB	mltC
	hr:min:sec
	00:01:07	0.074	0.076	0.072	0.071	0.074	0.078	0.075	0.072	0.072	0.072	0.073	0.072	0.074	0.076	0.072	0.072	0.07	0.069	0.069	0.068	0.069	0.07	0.071	0.073	0.073	0.071	0.072	0.071	0.068	0.069	0.068	0.069	0.072	0.073	0.073	0.07	0.069	0.068	0.068	0.068	0.068	0.068	0.07	0.075	0.075	0.07	0.069	0.068
	00:05:06	0.075	0.076	0.072	0.071	0.074	0.078	0.075	0.072	0.073	0.071	0.073	0.072	0.074	0.076	0.072	0.072	0.071	0.069	0.069	0.068	0.069	0.071	0.071	0.074	0.073	0.072	0.072	0.073	0.069	0.069	0.069	0.07	0.073	0.074	0.072	0.07	0.069	0.069	0.068	0.068	0.068	0.069	0.07	0.075	0.075	0.07	0.069	0.069
	00:10:06	0.071	0.072	0.069	0.069	0.072	0.075	0.072	0.07	0.07	0.069	0.071	0.07	0.071	0.072	0.069	0.069	0.068	0.067	0.067	0.067	0.067	0.069	0.068	0.071	0.071	0.069	0.07	0.07	0.067	0.067	0.067	0.068	0.07	0.071	0.069	0.067	0.067	0.066	0.066	0.066	0.066	0.067	0.068	0.072	0.071	0.068	0.066	0.066
	00:15:06	0.07	0.07	0.068	0.068	0.072	0.076	0.072	0.07	0.07	0.07	0.071	0.07	0.071	0.073	0.069	0.069	0.068	0.067	0.067	0.067	0.067	0.069	0.068	0.071	0.071	0.069	0.07	0.069	0.066	0.067	0.066	0.067	0.069	0.07	0.069	0.067	0.066	0.066	0.066	0.066	0.066	0.066	0.068	0.072	0.071	0.067	0.066	0.066
	00:20:06	0.071	0.071	0.07	0.069	0.072	0.076	0.073	0.07	0.071	0.07	0.071	0.07	0.071	0.073	0.07	0.07	0.069	0.068	0.068	0.068	0.068	0.07	0.069	0.072	0.071	0.069	0.07	0.069	0.066	0.067	0.066	0.067	0.069	0.07	0.069	0.067	0.067	0.066	0.066	0.067	0.066	0.067	0.068	0.072	0.071	0.067	0.066	0.066
	00:25:06	0.071	0.071	0.069	0.069	0.073	0.077	0.073	0.071	0.071	0.07	0.071	0.071	0.072	0.074	0.07	0.071	0.07	0.068	0.068	0.068	0.068	0.07	0.069	0.072	0.071	0.069	0.069	0.07	0.066	0.066	0.066	0.067	0.069	0.07	0.069	0.067	0.067	0.066	0.066	0.066	0.066	0.066	0.068	0.072	0.071	0.067	0.066	0.066
	00:30:06	0.071	0.071	0.069	0.069	0.074	0.077	0.074	0.071	0.072	0.071	0.072	0.072	0.072	0.075	0.071	0.071	0.07	0.069	0.069	0.068	0.068	0.071	0.07	0.073	0.071	0.069	0.07	0.069	0.066	0.067	0.066	0.067	0.069	0.07	0.07	0.067	0.067	0.067	0.066	0.067	0.066	0.067	0.068	0.073	0.071	0.067	0.066	0.066
	00:35:06	0.071	0.071	0.069	0.069	0.074	0.078	0.075	0.072	0.073	0.072	0.073	0.073	0.073	0.075	0.072	0.072	0.072	0.07	0.07	0.069	0.069	0.072	0.071	0.074	0.071	0.069	0.07	0.07	0.067	0.067	0.066	0.067	0.069	0.07	0.07	0.067	0.067	0.067	0.066	0.067	0.066	0.067	0.068	0.072	0.072	0.068	0.066	0.066
	00:40:06	0.07	0.07	0.069	0.068	0.075	0.079	0.075	0.072	0.073	0.072	0.073	0.073	0.073	0.076	0.072	0.073	0.072	0.07	0.07	0.069	0.07	0.073	0.071	0.074	0.071	0.069	0.069	0.069	0.066	0.066	0.066	0.066	0.068	0.069	0.069	0.067	0.066	0.066	0.066	0.066	0.066	0.066	0.068	0.071	0.071	0.067	0.066	0.066
	00:45:06	0.071	0.071	0.07	0.069	0.076	0.08	0.077	0.073	0.075	0.074	0.075	0.075	0.075	0.078	0.074	0.074	0.073	0.072	0.071	0.07	0.07	0.074	0.072	0.076	0.071	0.069	0.07	0.07	0.066	0.067	0.066	0.067	0.069	0.071	0.07	0.067	0.066	0.066	0.066	0.067	0.066	0.067	0.068	0.073	0.072	0.068	0.066	0.066
	00:50:06	0.072	0.071	0.069	0.069	0.078	0.082	0.078	0.075	0.077	0.075	0.076	0.077	0.076	0.079	0.075	0.076	0.075	0.073	0.073	0.072	0.072	0.076	0.074	0.078	0.072	0.069	0.07	0.07	0.066	0.067	0.066	0.067	0.069	0.071	0.07	0.067	0.067	0.066	0.066	0.067	0.066	0.067	0.068	0.073	0.072	0.068	0.066	0.066
	00:55:06	0.071	0.071	0.069	0.069	0.08	0.083	0.08	0.076	0.078	0.077	0.078	0.079	0.078	0.082	0.077	0.077	0.076	0.075	0.074	0.073	0.073	0.078	0.075	0.08	0.071	0.07	0.07	0.07	0.067	0.067	0.066	0.068	0.07	0.071	0.07	0.067	0.067	0.067	0.067	0.067	0.067	0.067	0.068	0.073	0.072	0.068	0.067	0.067
	01:00:06	0.071	0.071	0.069	0.069	0.081	0.085	0.082	0.078	0.081	0.079	0.079	0.081	0.079	0.083	0.078	0.08	0.078	0.076	0.076	0.075	0.075	0.08	0.077	0.082	0.071	0.069	0.07	0.07	0.067	0.067	0.066	0.067	0.069	0.07	0.07	0.067	0.067	0.066	0.066	0.067	0.066	0.067	0.068	0.072	0.072	0.068	0.067	0.067
	01:05:06	0.074	0.073	0.07	0.07	0.085	0.089	0.086	0.081	0.085	0.082	0.083	0.086	0.084	0.088	0.082	0.083	0.082	0.079	0.079	0.078	0.078	0.084	0.08	0.087	0.073	0.071	0.071	0.071	0.068	0.068	0.067	0.069	0.071	0.073	0.071	0.069	0.068	0.067	0.067	0.068	0.067	0.068	0.069	0.074	0.074	0.07	0.068	0.068
	01:10:06	0.072	0.072	0.07	0.07	0.087	0.091	0.088	0.083	0.087	0.084	0.084	0.087	0.085	0.09	0.084	0.085	0.084	0.081	0.081	0.079	0.079	0.086	0.081	0.089	0.071	0.07	0.07	0.07	0.067	0.067	0.066	0.068	0.07	0.071	0.07	0.068	0.067	0.067	0.067	0.067	0.067	0.067	0.069	0.073	0.073	0.069	0.067	0.067
	01:15:06	0.072	0.071	0.069	0.069	0.091	0.095	0.092	0.086	0.091	0.088	0.088	0.091	0.088	0.094	0.087	0.089	0.088	0.085	0.085	0.082	0.082	0.09	0.084	0.093	0.071	0.07	0.07	0.07	0.067	0.067	0.067	0.068	0.07	0.071	0.07	0.068	0.067	0.067	0.067	0.067	0.067	0.067	0.069	0.072	0.073	0.069	0.067	0.067
	01:20:06	0.072	0.071	0.07	0.069	0.095	0.1	0.097	0.09	0.096	0.092	0.092	0.096	0.092	0.1	0.091	0.094	0.092	0.089	0.088	0.086	0.085	0.095	0.088	0.098	0.071	0.07	0.07	0.07	0.067	0.067	0.066	0.068	0.069	0.071	0.07	0.068	0.067	0.067	0.067	0.067	0.067	0.067	0.069	0.073	0.074	0.069	0.068	0.068
	01:25:06	0.072	0.072	0.069	0.069	0.101	0.106	0.103	0.095	0.102	0.098	0.098	0.103	0.096	0.105	0.096	0.1	0.098	0.095	0.094	0.09	0.09	0.102	0.093	0.104	0.072	0.07	0.071	0.071	0.068	0.068	0.067	0.068	0.07	0.072	0.071	0.068	0.067	0.067	0.067	0.067	0.067	0.068	0.069	0.073	0.074	0.07	0.068	0.068
	01:30:06	0.072	0.071	0.069	0.069	0.107	0.113	0.111	0.1	0.109	0.104	0.104	0.111	0.102	0.113	0.103	0.107	0.104	0.101	0.101	0.096	0.096	0.109	0.098	0.112	0.071	0.07	0.071	0.071	0.068	0.068	0.067	0.068	0.07	0.072	0.071	0.068	0.068	0.067	0.067	0.067	0.067	0.068	0.069	0.073	0.074	0.071	0.068	0.068
	01:35:06	0.071	0.071	0.069	0.069	0.115	0.121	0.12	0.107	0.118	0.111	0.11	0.119	0.108	0.122	0.11	0.115	0.111	0.108	0.107	0.102	0.101	0.118	0.104	0.12	0.071	0.07	0.07	0.07	0.067	0.067	0.066	0.068	0.07	0.071	0.07	0.068	0.067	0.067	0.067	0.067	0.067	0.067	0.069	0.072	0.074	0.07	0.068	0.068
	01:40:06	0.073	0.072	0.07	0.07	0.127	0.133	0.131	0.117	0.13	0.123	0.121	0.132	0.118	0.134	0.12	0.127	0.124	0.119	0.118	0.111	0.11	0.131	0.114	0.134	0.072	0.071	0.071	0.071	0.068	0.068	0.067	0.069	0.071	0.072	0.071	0.069	0.068	0.068	0.068	0.068	0.067	0.068	0.07	0.073	0.075	0.072	0.069	0.069
	01:45:06	0.076	0.073	0.071	0.071	0.143	0.151	0.147	0.129	0.146	0.137	0.135	0.15	0.133	0.152	0.135	0.143	0.139	0.134	0.132	0.124	0.123	0.149	0.126	0.151	0.073	0.072	0.072	0.072	0.069	0.069	0.068	0.07	0.072	0.074	0.072	0.07	0.069	0.068	0.068	0.069	0.068	0.069	0.071	0.075	0.077	0.073	0.07	0.07
	01:50:06	0.073	0.072	0.07	0.07	0.157	0.168	0.165	0.142	0.164	0.153	0.15	0.167	0.146	0.17	0.15	0.16	0.155	0.149	0.148	0.136	0.134	0.169	0.139	0.17	0.072	0.071	0.071	0.071	0.068	0.068	0.067	0.069	0.071	0.072	0.071	0.069	0.068	0.068	0.068	0.068	0.067	0.068	0.07	0.073	0.076	0.072	0.07	0.07
	01:55:06	0.072	0.071	0.07	0.069	0.174	0.191	0.188	0.163	0.186	0.177	0.172	0.189	0.166	0.194	0.171	0.18	0.177	0.171	0.172	0.154	0.153	0.191	0.158	0.194	0.072	0.071	0.071	0.071	0.068	0.068	0.067	0.069	0.07	0.072	0.071	0.069	0.068	0.068	0.068	0.068	0.068	0.068	0.07	0.073	0.076	0.073	0.07	0.07
	02:00:06	0.076	0.073	0.071	0.071	0.198	0.21	0.205	0.184	0.199	0.195	0.192	0.202	0.189	0.209	0.19	0.198	0.195	0.188	0.188	0.176	0.175	0.202	0.181	0.209	0.074	0.073	0.073	0.073	0.07	0.07	0.069	0.071	0.073	0.075	0.073	0.07	0.07	0.069	0.069	0.069	0.069	0.07	0.071	0.075	0.079	0.075	0.072	0.072
	02:05:06	0.076	0.073	0.071	0.071	0.228	0.222	0.223	0.205	0.229	0.21	0.205	0.215	0.199	0.232	0.203	0.217	0.208	0.201	0.199	0.191	0.193	0.216	0.201	0.236	0.075	0.074	0.073	0.074	0.07	0.071	0.07	0.072	0.074	0.075	0.074	0.071	0.07	0.07	0.07	0.069	0.069	0.07	0.072	0.075	0.08	0.075	0.073	0.073
	02:10:06	0.073	0.072	0.07	0.07	0.244	0.237	0.241	0.221	0.246	0.237	0.232	0.241	0.222	0.254	0.226	0.237	0.23	0.219	0.223	0.201	0.203	0.238	0.212	0.255	0.074	0.072	0.073	0.073	0.07	0.07	0.069	0.071	0.072	0.074	0.073	0.07	0.07	0.069	0.069	0.069	0.069	0.07	0.071	0.074	0.079	0.075	0.073	0.073
	02:15:06	0.072	0.071	0.069	0.069	0.259	0.265	0.262	0.235	0.263	0.251	0.249	0.256	0.244	0.274	0.237	0.255	0.251	0.247	0.245	0.235	0.234	0.255	0.239	0.273	0.073	0.073	0.073	0.073	0.07	0.07	0.069	0.071	0.071	0.073	0.073	0.071	0.07	0.069	0.069	0.069	0.069	0.07	0.071	0.074	0.079	0.076	0.073	0.074
	02:20:06	0.073	0.071	0.069	0.069	0.287	0.287	0.279	0.255	0.276	0.264	0.262	0.267	0.261	0.29	0.256	0.27	0.263	0.258	0.259	0.244	0.243	0.27	0.253	0.288	0.074	0.073	0.074	0.074	0.07	0.07	0.07	0.072	0.072	0.074	0.074	0.072	0.07	0.07	0.07	0.07	0.069	0.071	0.072	0.074	0.08	0.078	0.075	0.075
	02:25:06	0.072	0.071	0.07	0.069	0.31	0.311	0.303	0.275	0.304	0.29	0.287	0.29	0.28	0.314	0.283	0.298	0.293	0.286	0.284	0.269	0.268	0.294	0.274	0.311	0.075	0.074	0.075	0.074	0.071	0.071	0.07	0.072	0.073	0.075	0.074	0.072	0.071	0.071	0.071	0.07	0.07	0.071	0.073	0.075	0.081	0.079	0.076	0.076
	02:30:06	0.073	0.072	0.07	0.07	0.335	0.33	0.325	0.297	0.325	0.313	0.309	0.318	0.302	0.337	0.305	0.324	0.312	0.303	0.302	0.288	0.282	0.314	0.295	0.339	0.076	0.075	0.076	0.075	0.072	0.072	0.071	0.074	0.074	0.076	0.076	0.073	0.072	0.071	0.071	0.071	0.071	0.072	0.073	0.076	0.083	0.08	0.077	0.077
	02:35:06	0.073	0.072	0.07	0.07	0.354	0.363	0.353	0.322	0.344	0.335	0.326	0.344	0.328	0.358	0.336	0.347	0.337	0.329	0.326	0.312	0.305	0.344	0.316	0.359	0.077	0.077	0.077	0.077	0.073	0.073	0.072	0.075	0.075	0.076	0.076	0.075	0.073	0.073	0.073	0.072	0.072	0.073	0.074	0.076	0.084	0.082	0.079	0.079
	02:40:06	0.073	0.072	0.07	0.07	0.382	0.394	0.374	0.357	0.364	0.363	0.358	0.373	0.365	0.375	0.359	0.364	0.363	0.353	0.358	0.346	0.344	0.375	0.355	0.372	0.079	0.078	0.078	0.078	0.075	0.074	0.074	0.077	0.076	0.078	0.078	0.076	0.074	0.074	0.074	0.073	0.073	0.075	0.075	0.077	0.086	0.084	0.08	0.081
	02:45:06	0.073	0.072	0.069	0.07	0.389	0.402	0.394	0.371	0.389	0.371	0.368	0.386	0.374	0.397	0.369	0.383	0.375	0.366	0.368	0.364	0.362	0.396	0.377	0.394	0.081	0.081	0.08	0.08	0.076	0.076	0.075	0.079	0.077	0.079	0.079	0.078	0.076	0.075	0.075	0.074	0.074	0.077	0.076	0.078	0.088	0.086	0.083	0.083
	02:50:06	0.073	0.072	0.07	0.07	0.412	0.405	0.394	0.379	0.381	0.406	0.394	0.403	0.383	0.397	0.4	0.395	0.392	0.385	0.382	0.37	0.364	0.406	0.382	0.407	0.083	0.083	0.082	0.081	0.078	0.078	0.077	0.081	0.079	0.081	0.082	0.081	0.078	0.077	0.077	0.075	0.075	0.079	0.078	0.08	0.09	0.089	0.084	0.085
	02:55:06	0.073	0.072	0.07	0.07	0.4	0.389	0.373	0.388	0.368	0.381	0.373	0.413	0.389	0.378	0.382	0.38	0.375	0.367	0.37	0.375	0.378	0.409	0.396	0.382	0.086	0.085	0.085	0.084	0.081	0.08	0.079	0.084	0.08	0.082	0.084	0.083	0.08	0.079	0.079	0.077	0.077	0.081	0.079	0.081	0.092	0.091	0.087	0.088
	03:00:06	0.074	0.073	0.07	0.07	0.402	0.396	0.381	0.377	0.373	0.379	0.373	0.411	0.386	0.388	0.375	0.381	0.378	0.368	0.372	0.378	0.376	0.407	0.392	0.388	0.09	0.09	0.089	0.087	0.084	0.083	0.082	0.088	0.083	0.087	0.088	0.088	0.083	0.082	0.082	0.08	0.08	0.085	0.083	0.085	0.096	0.096	0.09	0.091
	03:05:06	0.073	0.072	0.07	0.07	0.404	0.397	0.386	0.38	0.381	0.385	0.379	0.413	0.388	0.394	0.378	0.388	0.383	0.372	0.377	0.38	0.378	0.441	0.387	0.394	0.093	0.094	0.092	0.091	0.087	0.087	0.085	0.092	0.085	0.088	0.091	0.091	0.087	0.085	0.085	0.082	0.083	0.088	0.085	0.086	0.098	0.099	0.093	0.094
	03:10:06	0.077	0.074	0.071	0.071	0.413	0.402	0.391	0.385	0.389	0.39	0.392	0.419	0.397	0.408	0.379	0.395	0.397	0.386	0.389	0.394	0.39	0.424	0.4	0.408	0.101	0.102	0.099	0.097	0.094	0.093	0.091	0.1	0.092	0.096	0.098	0.098	0.094	0.091	0.091	0.087	0.088	0.094	0.09	0.092	0.104	0.105	0.099	0.099
	03:15:06	0.073	0.071	0.069	0.069	0.422	0.415	0.399	0.391	0.395	0.404	0.396	0.421	0.395	0.405	0.389	0.4	0.398	0.385	0.39	0.393	0.384	0.419	0.397	0.409	0.107	0.107	0.104	0.101	0.098	0.097	0.095	0.105	0.094	0.098	0.103	0.104	0.098	0.095	0.095	0.09	0.091	0.099	0.094	0.094	0.106	0.109	0.102	0.103
	03:20:06	0.078	0.074	0.071	0.071	0.418	0.398	0.437	0.397	0.409	0.404	0.4	0.43	0.406	0.388	0.374	0.399	0.405	0.392	0.397	0.401	0.395	0.432	0.403	0.391	0.117	0.117	0.114	0.11	0.107	0.106	0.103	0.115	0.102	0.107	0.113	0.114	0.106	0.103	0.103	0.096	0.098	0.107	0.1	0.101	0.113	0.115	0.108	0.109
	03:25:06	0.077	0.073	0.071	0.071	0.436	0.426	0.411	0.44	0.402	0.438	0.446	0.427	0.459	0.415	0.403	0.412	0.437	0.435	0.422	0.402	0.392	0.43	0.409	0.414	0.127	0.128	0.123	0.119	0.115	0.113	0.11	0.126	0.108	0.114	0.121	0.125	0.114	0.111	0.112	0.103	0.105	0.116	0.107	0.105	0.118	0.121	0.113	0.114
	03:30:06	0.073	0.072	0.07	0.07	0.435	0.426	0.415	0.409	0.409	0.414	0.41	0.432	0.414	0.418	0.404	0.413	0.418	0.406	0.413	0.441	0.412	0.432	0.44	0.419	0.139	0.142	0.136	0.131	0.127	0.125	0.121	0.14	0.115	0.122	0.133	0.139	0.125	0.121	0.12	0.11	0.113	0.126	0.115	0.112	0.122	0.128	0.119	0.12
	03:35:06	0.073	0.072	0.07	0.07	0.442	0.427	0.418	0.41	0.414	0.415	0.417	0.434	0.415	0.422	0.407	0.418	0.416	0.402	0.412	0.409	0.404	0.43	0.418	0.427	0.156	0.159	0.151	0.145	0.141	0.137	0.134	0.154	0.126	0.134	0.148	0.155	0.14	0.134	0.134	0.12	0.124	0.141	0.125	0.121	0.129	0.136	0.126	0.127
	03:40:06	0.078	0.074	0.071	0.071	0.438	0.442	0.44	0.43	0.434	0.438	0.44	0.462	0.438	0.446	0.428	0.444	0.445	0.428	0.437	0.437	0.436	0.464	0.447	0.453	0.178	0.184	0.174	0.166	0.163	0.158	0.154	0.176	0.144	0.155	0.172	0.179	0.161	0.154	0.153	0.136	0.142	0.161	0.142	0.138	0.139	0.145	0.136	0.137
	03:45:06	0.073	0.072	0.07	0.07	0.442	0.437	0.426	0.418	0.42	0.424	0.421	0.447	0.42	0.431	0.415	0.429	0.434	0.418	0.424	0.426	0.424	0.444	0.429	0.43	0.191	0.195	0.189	0.182	0.179	0.176	0.171	0.184	0.158	0.17	0.184	0.191	0.178	0.171	0.172	0.151	0.158	0.173	0.157	0.149	0.146	0.154	0.144	0.145
	03:50:06	0.073	0.072	0.07	0.07	0.446	0.438	0.431	0.43	0.434	0.438	0.436	0.458	0.432	0.441	0.427	0.445	0.447	0.431	0.44	0.438	0.436	0.463	0.446	0.447	0.207	0.206	0.203	0.192	0.188	0.189	0.185	0.192	0.182	0.19	0.189	0.206	0.185	0.188	0.185	0.175	0.181	0.189	0.183	0.167	0.156	0.165	0.153	0.154
	03:55:06	0.073	0.072	0.07	0.07	0.455	0.442	0.435	0.432	0.434	0.44	0.438	0.456	0.432	0.438	0.42	0.435	0.441	0.423	0.429	0.431	0.434	0.455	0.433	0.439	0.232	0.234	0.218	0.209	0.206	0.201	0.196	0.213	0.19	0.197	0.216	0.222	0.202	0.196	0.194	0.189	0.189	0.193	0.19	0.185	0.166	0.178	0.165	0.166
	04:00:06	0.073	0.072	0.069	0.07	0.458	0.443	0.436	0.43	0.437	0.438	0.443	0.462	0.432	0.441	0.423	0.444	0.452	0.436	0.441	0.444	0.448	0.462	0.445	0.445	0.242	0.255	0.242	0.231	0.227	0.223	0.218	0.236	0.207	0.222	0.237	0.246	0.222	0.216	0.215	0.199	0.208	0.215	0.206	0.196	0.178	0.19	0.177	0.178
	04:05:06	0.073	0.072	0.069	0.069	0.457	0.444	0.445	0.441	0.446	0.454	0.447	0.477	0.446	0.453	0.426	0.447	0.463	0.441	0.449	0.447	0.454	0.47	0.453	0.456	0.275	0.269	0.258	0.247	0.244	0.241	0.234	0.247	0.222	0.242	0.258	0.261	0.242	0.234	0.233	0.216	0.222	0.235	0.224	0.22	0.188	0.202	0.189	0.191
	04:10:06	0.073	0.073	0.07	0.07	0.466	0.455	0.448	0.441	0.448	0.455	0.453	0.478	0.446	0.454	0.433	0.455	0.471	0.45	0.459	0.455	0.465	0.478	0.461	0.457	0.289	0.298	0.284	0.273	0.27	0.266	0.259	0.279	0.249	0.263	0.281	0.292	0.268	0.26	0.261	0.242	0.251	0.264	0.254	0.241	0.196	0.209	0.2	0.2
	04:15:06	0.073	0.072	0.069	0.069	0.483	0.483	0.462	0.449	0.456	0.464	0.457	0.487	0.461	0.471	0.449	0.466	0.475	0.455	0.461	0.46	0.47	0.478	0.469	0.471	0.33	0.323	0.302	0.292	0.288	0.282	0.275	0.298	0.265	0.285	0.301	0.312	0.286	0.278	0.278	0.257	0.264	0.276	0.273	0.263	0.203	0.219	0.207	0.207
	04:20:06	0.075	0.073	0.071	0.07	0.483	0.472	0.462	0.46	0.457	0.472	0.464	0.487	0.458	0.469	0.448	0.473	0.485	0.457	0.475	0.469	0.48	0.491	0.471	0.474	0.345	0.351	0.337	0.325	0.322	0.318	0.308	0.335	0.299	0.319	0.334	0.351	0.322	0.311	0.312	0.285	0.291	0.312	0.305	0.29	0.216	0.231	0.217	0.218
	04:25:06	0.073	0.073	0.07	0.07	0.501	0.479	0.471	0.458	0.465	0.477	0.47	0.495	0.465	0.474	0.45	0.478	0.491	0.473	0.488	0.48	0.487	0.5	0.478	0.482	0.374	0.375	0.354	0.347	0.343	0.34	0.331	0.352	0.321	0.344	0.353	0.364	0.342	0.337	0.337	0.31	0.318	0.339	0.329	0.318	0.225	0.242	0.228	0.229
	04:30:06	0.074	0.073	0.07	0.07	0.509	0.487	0.483	0.463	0.477	0.479	0.48	0.502	0.472	0.486	0.46	0.487	0.502	0.481	0.499	0.49	0.495	0.507	0.489	0.489	0.388	0.382	0.37	0.364	0.358	0.362	0.352	0.371	0.35	0.368	0.377	0.376	0.363	0.355	0.357	0.339	0.341	0.357	0.352	0.344	0.236	0.253	0.238	0.238
	04:35:06	0.079	0.075	0.072	0.072	0.529	0.527	0.5	0.481	0.487	0.492	0.495	0.51	0.493	0.509	0.488	0.518	0.531	0.506	0.521	0.52	0.517	0.534	0.521	0.511	0.426	0.425	0.388	0.38	0.375	0.375	0.364	0.393	0.379	0.388	0.394	0.402	0.378	0.37	0.366	0.359	0.36	0.376	0.377	0.377	0.25	0.266	0.251	0.251
	04:40:06	0.073	0.073	0.07	0.07	0.532	0.517	0.498	0.477	0.492	0.492	0.491	0.52	0.488	0.504	0.478	0.506	0.522	0.497	0.517	0.512	0.521	0.524	0.51	0.513	0.408	0.406	0.399	0.398	0.393	0.398	0.385	0.401	0.38	0.397	0.402	0.394	0.397	0.379	0.391	0.374	0.374	0.39	0.383	0.386	0.26	0.276	0.261	0.261
	04:45:06	0.074	0.073	0.07	0.07	0.531	0.517	0.503	0.487	0.496	0.501	0.504	0.529	0.494	0.504	0.482	0.515	0.531	0.503	0.522	0.519	0.534	0.524	0.516	0.519	0.404	0.39	0.382	0.382	0.376	0.381	0.377	0.404	0.395	0.406	0.387	0.385	0.381	0.382	0.381	0.381	0.384	0.402	0.405	0.395	0.266	0.284	0.271	0.269
	04:50:06	0.074	0.073	0.07	0.07	0.545	0.535	0.509	0.501	0.5	0.511	0.509	0.533	0.51	0.514	0.495	0.517	0.532	0.508	0.524	0.518	0.534	0.522	0.517	0.52	0.412	0.394	0.387	0.376	0.37	0.376	0.371	0.414	0.391	0.383	0.386	0.384	0.376	0.375	0.371	0.388	0.378	0.406	0.404	0.404	0.272	0.292	0.278	0.276
	04:55:06	0.078	0.075	0.071	0.071	0.565	0.545	0.523	0.513	0.513	0.516	0.521	0.541	0.517	0.527	0.504	0.531	0.554	0.522	0.544	0.534	0.556	0.538	0.533	0.535	0.415	0.397	0.391	0.384	0.377	0.383	0.373	0.406	0.386	0.386	0.388	0.388	0.377	0.377	0.373	0.385	0.375	0.425	0.393	0.402	0.283	0.304	0.287	0.288
	05:00:06	0.074	0.073	0.07	0.07	0.587	0.589	0.545	0.527	0.532	0.536	0.542	0.539	0.543	0.557	0.537	0.567	0.587	0.553	0.571	0.565	0.583	0.566	0.568	0.563	0.427	0.407	0.401	0.393	0.39	0.393	0.384	0.42	0.396	0.399	0.393	0.402	0.392	0.388	0.385	0.392	0.386	0.412	0.398	0.409	0.292	0.316	0.295	0.298
	05:05:06	0.073	0.072	0.07	0.07	0.605	0.61	0.572	0.538	0.554	0.55	0.566	0.569	0.555	0.582	0.553	0.589	0.604	0.566	0.585	0.578	0.593	0.584	0.591	0.588	0.412	0.405	0.404	0.394	0.392	0.394	0.386	0.422	0.395	0.395	0.394	0.401	0.394	0.39	0.388	0.392	0.387	0.414	0.398	0.402	0.299	0.325	0.303	0.306
	05:10:06	0.079	0.075	0.072	0.072	0.618	0.622	0.58	0.549	0.56	0.556	0.574	0.557	0.575	0.59	0.559	0.593	0.61	0.569	0.589	0.581	0.607	0.584	0.597	0.598	0.438	0.426	0.41	0.402	0.397	0.402	0.393	0.427	0.405	0.409	0.418	0.436	0.399	0.394	0.388	0.396	0.391	0.417	0.403	0.415	0.311	0.336	0.316	0.318
	05:15:06	0.073	0.073	0.07	0.07	0.621	0.631	0.587	0.557	0.567	0.565	0.577	0.571	0.578	0.591	0.57	0.601	0.63	0.589	0.609	0.6	0.622	0.587	0.614	0.6	0.439	0.427	0.416	0.418	0.404	0.447	0.415	0.43	0.398	0.417	0.416	0.414	0.449	0.428	0.416	0.406	0.4	0.425	0.402	0.419	0.318	0.345	0.324	0.326
	05:20:06	0.075	0.073	0.071	0.071	0.654	0.674	0.628	0.59	0.602	0.605	0.609	0.597	0.62	0.633	0.606	0.64	0.659	0.616	0.633	0.628	0.636	0.628	0.644	0.644	0.435	0.432	0.431	0.422	0.415	0.424	0.417	0.441	0.42	0.424	0.415	0.422	0.421	0.418	0.412	0.425	0.432	0.43	0.427	0.436	0.329	0.354	0.337	0.338
	05:25:06	0.075	0.073	0.071	0.071	0.66	0.677	0.631	0.6	0.605	0.606	0.621	0.598	0.628	0.649	0.612	0.649	0.663	0.62	0.638	0.637	0.651	0.633	0.654	0.656	0.444	0.426	0.435	0.426	0.422	0.423	0.414	0.446	0.424	0.425	0.423	0.424	0.421	0.416	0.41	0.423	0.415	0.433	0.428	0.438	0.339	0.363	0.346	0.346
	05:30:06	0.077	0.074	0.071	0.071	0.673	0.682	0.637	0.601	0.612	0.614	0.624	0.604	0.628	0.658	0.613	0.654	0.682	0.636	0.655	0.649	0.666	0.652	0.672	0.669	0.447	0.434	0.431	0.42	0.416	0.423	0.416	0.446	0.424	0.424	0.424	0.426	0.423	0.418	0.414	0.421	0.416	0.439	0.428	0.433	0.349	0.371	0.353	0.354
	05:35:06	0.077	0.074	0.071	0.071	0.694	0.708	0.651	0.617	0.621	0.62	0.635	0.611	0.649	0.666	0.626	0.671	0.695	0.644	0.67	0.665	0.68	0.654	0.686	0.683	0.446	0.438	0.438	0.427	0.422	0.425	0.416	0.448	0.42	0.428	0.423	0.431	0.426	0.42	0.415	0.423	0.418	0.439	0.427	0.433	0.36	0.382	0.363	0.364
	05:40:06	0.075	0.073	0.071	0.071	0.706	0.72	0.654	0.632	0.627	0.636	0.651	0.623	0.668	0.667	0.642	0.691	0.708	0.653	0.683	0.682	0.701	0.661	0.695	0.684	0.465	0.446	0.453	0.445	0.439	0.439	0.431	0.462	0.434	0.437	0.434	0.442	0.437	0.431	0.424	0.43	0.425	0.446	0.433	0.446	0.37	0.39	0.372	0.372
	05:45:06	0.079	0.075	0.072	0.072	0.736	0.754	0.702	0.663	0.671	0.664	0.675	0.653	0.701	0.715	0.669	0.716	0.727	0.671	0.696	0.688	0.705	0.686	0.721	0.723	0.46	0.45	0.455	0.446	0.437	0.442	0.435	0.467	0.438	0.438	0.428	0.439	0.435	0.436	0.424	0.431	0.429	0.448	0.433	0.438	0.382	0.4	0.382	0.383
	05:50:06	0.078	0.075	0.072	0.072	0.742	0.766	0.701	0.662	0.669	0.669	0.679	0.654	0.701	0.715	0.674	0.719	0.737	0.684	0.709	0.709	0.726	0.696	0.738	0.73	0.465	0.451	0.463	0.452	0.445	0.446	0.433	0.47	0.438	0.44	0.438	0.448	0.443	0.44	0.433	0.44	0.437	0.457	0.441	0.447	0.394	0.411	0.392	0.392
	05:55:06	0.075	0.073	0.071	0.071	0.754	0.773	0.699	0.67	0.67	0.676	0.686	0.656	0.716	0.722	0.683	0.737	0.748	0.684	0.718	0.712	0.738	0.7	0.746	0.738	0.473	0.457	0.467	0.455	0.448	0.456	0.446	0.471	0.442	0.445	0.445	0.457	0.447	0.444	0.439	0.444	0.442	0.462	0.445	0.452	0.405	0.417	0.4	0.4
	06:00:06	0.077	0.074	0.071	0.071	0.754	0.774	0.712	0.681	0.683	0.689	0.705	0.667	0.722	0.734	0.689	0.751	0.766	0.708	0.738	0.735	0.749	0.719	0.768	0.754	0.474	0.462	0.472	0.462	0.454	0.46	0.449	0.483	0.443	0.447	0.448	0.455	0.451	0.452	0.445	0.452	0.449	0.466	0.447	0.456	0.411	0.431	0.409	0.41
	06:05:06	0.074	0.073	0.07	0.07	0.768	0.802	0.727	0.697	0.691	0.7	0.716	0.678	0.737	0.743	0.707	0.765	0.786	0.72	0.754	0.746	0.768	0.732	0.788	0.771	0.479	0.467	0.472	0.463	0.456	0.461	0.453	0.481	0.447	0.45	0.452	0.458	0.451	0.454	0.448	0.454	0.45	0.47	0.45	0.458	0.413	0.437	0.418	0.418
	06:10:06	0.078	0.075	0.072	0.072	0.807	0.825	0.761	0.72	0.723	0.728	0.74	0.712	0.77	0.764	0.728	0.786	0.799	0.732	0.769	0.76	0.782	0.745	0.804	0.792	0.5	0.479	0.484	0.474	0.467	0.478	0.465	0.493	0.459	0.459	0.464	0.471	0.465	0.461	0.455	0.459	0.459	0.478	0.455	0.47	0.422	0.448	0.432	0.431
	06:15:06	0.073	0.073	0.07	0.07	0.823	0.841	0.781	0.743	0.744	0.757	0.761	0.743	0.788	0.79	0.746	0.799	0.816	0.756	0.786	0.784	0.799	0.776	0.826	0.807	0.514	0.488	0.5	0.488	0.482	0.488	0.473	0.504	0.469	0.468	0.477	0.484	0.478	0.479	0.471	0.476	0.477	0.49	0.467	0.476	0.423	0.45	0.437	0.435
	06:20:06	0.074	0.073	0.07	0.07	0.811	0.835	0.763	0.731	0.719	0.739	0.751	0.727	0.774	0.773	0.741	0.805	0.818	0.748	0.787	0.779	0.805	0.763	0.823	0.802	0.512	0.492	0.497	0.486	0.475	0.482	0.469	0.5	0.466	0.471	0.476	0.486	0.48	0.475	0.467	0.47	0.469	0.485	0.472	0.484	0.42	0.451	0.437	0.436
	06:25:06	0.079	0.075	0.072	0.072	0.833	0.859	0.768	0.75	0.73	0.758	0.774	0.74	0.799	0.788	0.763	0.825	0.831	0.755	0.797	0.789	0.82	0.78	0.83	0.811	0.532	0.511	0.511	0.501	0.491	0.497	0.482	0.517	0.483	0.494	0.493	0.504	0.497	0.488	0.489	0.488	0.489	0.49	0.496	0.499	0.426	0.459	0.447	0.446
	06:30:06	0.074	0.073	0.07	0.07	0.862	0.881	0.813	0.784	0.774	0.79	0.798	0.78	0.825	0.826	0.783	0.836	0.855	0.791	0.823	0.819	0.838	0.809	0.862	0.841	0.554	0.518	0.525	0.509	0.501	0.509	0.498	0.532	0.493	0.503	0.506	0.51	0.503	0.5	0.492	0.495	0.507	0.507	0.497	0.505	0.429	0.461	0.448	0.447
	06:35:06	0.079	0.075	0.072	0.072	0.863	0.893	0.822	0.781	0.774	0.791	0.802	0.779	0.834	0.84	0.786	0.848	0.865	0.796	0.834	0.829	0.853	0.809	0.864	0.847	0.564	0.53	0.536	0.518	0.507	0.515	0.501	0.534	0.502	0.503	0.515	0.52	0.508	0.502	0.495	0.498	0.507	0.508	0.501	0.51	0.433	0.466	0.454	0.453
	06:40:06	0.074	0.073	0.07	0.07	0.872	0.904	0.847	0.812	0.809	0.825	0.827	0.818	0.853	0.848	0.811	0.864	0.879	0.818	0.846	0.844	0.862	0.834	0.892	0.862	0.601	0.551	0.552	0.533	0.524	0.528	0.515	0.545	0.518	0.522	0.545	0.542	0.528	0.523	0.514	0.517	0.529	0.518	0.518	0.533	0.436	0.468	0.455	0.454
	06:45:06	0.073	0.073	0.07	0.07	0.882	0.915	0.842	0.812	0.8	0.818	0.832	0.803	0.858	0.856	0.82	0.876	0.889	0.818	0.854	0.847	0.873	0.84	0.894	0.869	0.596	0.557	0.552	0.532	0.528	0.534	0.519	0.547	0.517	0.526	0.543	0.544	0.535	0.524	0.519	0.514	0.526	0.52	0.525	0.531	0.437	0.468	0.455	0.453
	06:50:06	0.075	0.074	0.071	0.071	0.89	0.921	0.84	0.813	0.796	0.826	0.838	0.801	0.87	0.86	0.826	0.89	0.903	0.827	0.866	0.86	0.892	0.85	0.908	0.881	0.598	0.564	0.557	0.539	0.535	0.542	0.525	0.554	0.53	0.536	0.549	0.551	0.544	0.53	0.529	0.523	0.533	0.529	0.537	0.544	0.443	0.471	0.458	0.456
	06:55:06	0.073	0.073	0.07	0.07	0.906	0.934	0.882	0.844	0.843	0.858	0.855	0.839	0.888	0.889	0.842	0.902	0.917	0.853	0.885	0.88	0.903	0.868	0.93	0.904	0.649	0.603	0.586	0.567	0.555	0.56	0.538	0.559	0.549	0.569	0.592	0.584	0.562	0.554	0.544	0.537	0.552	0.543	0.559	0.573	0.448	0.477	0.462	0.461
	07:00:06	0.079	0.075	0.072	0.072	0.922	0.95	0.892	0.863	0.855	0.868	0.881	0.857	0.907	0.905	0.863	0.919	0.925	0.856	0.89	0.883	0.906	0.883	0.939	0.918	0.65	0.614	0.596	0.573	0.565	0.579	0.567	0.589	0.566	0.588	0.596	0.594	0.579	0.572	0.557	0.555	0.57	0.561	0.572	0.585	0.455	0.484	0.469	0.468
	07:05:06	0.074	0.074	0.07	0.07	0.916	0.95	0.885	0.849	0.844	0.857	0.861	0.832	0.872	0.875	0.868	0.924	0.937	0.867	0.905	0.896	0.921	0.884	0.936	0.894	0.667	0.628	0.598	0.57	0.563	0.572	0.547	0.574	0.565	0.584	0.606	0.604	0.58	0.559	0.557	0.546	0.559	0.558	0.578	0.576	0.452	0.484	0.465	0.463
	07:10:06	0.073	0.073	0.07	0.07	0.927	0.96	0.915	0.88	0.874	0.896	0.892	0.876	0.915	0.913	0.874	0.935	0.95	0.886	0.917	0.914	0.935	0.903	0.964	0.936	0.691	0.649	0.636	0.609	0.599	0.601	0.582	0.596	0.59	0.613	0.635	0.635	0.606	0.591	0.587	0.575	0.598	0.579	0.605	0.608	0.459	0.492	0.475	0.473
	07:15:06	0.073	0.073	0.07	0.07	0.934	0.967	0.921	0.889	0.879	0.9	0.903	0.886	0.925	0.914	0.881	0.942	0.957	0.891	0.924	0.918	0.941	0.913	0.973	0.937	0.707	0.66	0.646	0.615	0.608	0.612	0.592	0.607	0.602	0.62	0.649	0.644	0.615	0.601	0.595	0.583	0.61	0.584	0.613	0.623	0.464	0.494	0.479	0.477
	07:20:06	0.072	0.073	0.07	0.07	0.944	0.973	0.925	0.889	0.885	0.904	0.907	0.891	0.933	0.924	0.894	0.951	0.965	0.899	0.934	0.927	0.947	0.93	0.983	0.945	0.708	0.669	0.645	0.614	0.607	0.624	0.606	0.616	0.618	0.631	0.656	0.652	0.626	0.61	0.602	0.594	0.623	0.593	0.622	0.63	0.465	0.498	0.484	0.481
	07:25:06	0.073	0.073	0.07	0.07	0.945	0.98	0.93	0.895	0.89	0.911	0.916	0.898	0.945	0.933	0.899	0.958	0.979	0.908	0.946	0.939	0.97	0.941	0.992	0.953	0.717	0.685	0.666	0.628	0.623	0.639	0.61	0.614	0.632	0.647	0.674	0.668	0.645	0.618	0.614	0.598	0.639	0.602	0.634	0.639	0.468	0.501	0.486	0.483
	07:30:06	0.072	0.073	0.07	0.07	0.966	0.997	0.954	0.922	0.913	0.93	0.935	0.917	0.954	0.922	0.92	0.978	0.99	0.918	0.958	0.948	0.971	0.954	1.006	0.966	0.753	0.709	0.689	0.654	0.644	0.656	0.629	0.635	0.653	0.665	0.688	0.692	0.662	0.64	0.637	0.619	0.654	0.623	0.658	0.659	0.474	0.505	0.491	0.488
	07:35:06	0.072	0.073	0.07	0.07	0.96	0.998	0.948	0.909	0.903	0.925	0.928	0.92	0.958	0.947	0.914	0.974	0.999	0.926	0.964	0.949	0.977	0.959	1.009	0.968	0.749	0.715	0.69	0.647	0.636	0.663	0.636	0.639	0.647	0.662	0.695	0.694	0.66	0.635	0.63	0.612	0.652	0.622	0.654	0.669	0.472	0.504	0.491	0.489
	07:40:06	0.073	0.073	0.07	0.07	0.98	1.007	0.969	0.934	0.928	0.939	0.943	0.92	0.943	0.931	0.936	0.988	1.007	0.941	0.973	0.964	0.99	0.973	1.014	0.958	0.782	0.735	0.715	0.678	0.666	0.684	0.651	0.656	0.677	0.675	0.719	0.717	0.687	0.67	0.661	0.644	0.678	0.643	0.688	0.681	0.479	0.512	0.498	0.495
	07:45:06	0.072	0.073	0.07	0.07	0.993	1.018	0.975	0.942	0.937	0.952	0.96	0.949	0.982	0.975	0.94	0.994	1.015	0.947	0.981	0.974	0.995	0.989	1.03	0.994	0.792	0.753	0.722	0.681	0.672	0.687	0.664	0.674	0.69	0.707	0.739	0.736	0.698	0.679	0.667	0.658	0.691	0.661	0.703	0.712	0.482	0.516	0.502	0.5
	07:50:06	0.072	0.073	0.07	0.07	0.994	1.023	0.985	0.949	0.949	0.96	0.97	0.959	0.995	0.984	0.949	1.001	1.025	0.96	0.992	0.987	1.008	0.999	1.037	0.999	0.808	0.775	0.747	0.701	0.69	0.711	0.681	0.691	0.716	0.729	0.755	0.755	0.72	0.699	0.685	0.675	0.712	0.679	0.727	0.733	0.487	0.521	0.507	0.504
	07:55:06	0.073	0.074	0.071	0.071	0.993	1.03	0.995	0.96	0.962	0.973	0.977	0.97	0.999	0.987	0.958	1.014	1.032	0.967	0.999	0.993	1.011	1.009	1.049	1.008	0.821	0.786	0.761	0.717	0.707	0.723	0.694	0.705	0.728	0.74	0.765	0.768	0.733	0.706	0.697	0.685	0.723	0.687	0.74	0.74	0.487	0.522	0.509	0.506
	08:00:06	0.073	0.073	0.07	0.07	1.009	1.036	1.003	0.973	0.972	0.984	0.988	0.985	1.005	0.996	0.966	1.015	1.034	0.971	1.002	0.998	1.02	1.019	1.054	1.015	0.837	0.805	0.782	0.742	0.729	0.734	0.707	0.723	0.749	0.764	0.785	0.784	0.756	0.73	0.724	0.712	0.745	0.712	0.768	0.765	0.498	0.532	0.518	0.515
	08:05:06	0.072	0.073	0.07	0.07	1.008	1.04	1.009	0.98	0.982	0.993	0.994	0.996	1.015	0.999	0.973	1.024	1.048	0.985	1.017	1.009	1.029	1.028	1.065	1.023	0.846	0.816	0.797	0.749	0.735	0.746	0.72	0.723	0.755	0.772	0.792	0.799	0.767	0.739	0.732	0.715	0.757	0.714	0.775	0.772	0.499	0.533	0.518	0.516
	08:10:06	0.073	0.073	0.07	0.071	1.012	1.047	1.021	0.992	0.995	1.005	1.004	1.007	1.021	1.009	0.983	1.033	1.05	0.987	1.019	1.015	1.035	1.036	1.069	1.026	0.858	0.833	0.812	0.775	0.763	0.769	0.738	0.744	0.777	0.788	0.805	0.812	0.787	0.754	0.757	0.738	0.776	0.743	0.798	0.786	0.506	0.54	0.525	0.523
	08:15:06	0.073	0.073	0.07	0.07	1.022	1.05	1.023	0.994	0.999	1.007	1.007	1.016	1.026	1.015	0.983	1.033	1.054	0.994	1.024	1.019	1.039	1.041	1.073	1.029	0.868	0.844	0.82	0.779	0.77	0.783	0.758	0.757	0.788	0.798	0.818	0.823	0.795	0.774	0.764	0.752	0.791	0.744	0.808	0.794	0.506	0.541	0.526	0.524
	08:20:06	0.072	0.073	0.071	0.071	1.033	1.059	1.035	1.007	1.01	1.021	1.019	1.029	1.037	1.024	0.989	1.042	1.063	1.006	1.034	1.027	1.05	1.051	1.083	1.041	0.882	0.856	0.835	0.797	0.788	0.792	0.767	0.772	0.803	0.812	0.83	0.836	0.809	0.793	0.783	0.768	0.806	0.768	0.825	0.818	0.513	0.547	0.533	0.531
	08:25:06	0.073	0.073	0.07	0.07	1.034	1.065	1.037	1.012	1.016	1.023	1.023	1.037	1.037	1.026	0.999	1.049	1.068	1.01	1.04	1.036	1.056	1.063	1.091	1.042	0.894	0.87	0.848	0.805	0.795	0.802	0.77	0.781	0.816	0.831	0.847	0.848	0.822	0.804	0.791	0.782	0.818	0.782	0.842	0.834	0.518	0.551	0.536	0.534
	08:30:06	0.074	0.074	0.071	0.071	1.037	1.073	1.049	1.025	1.026	1.031	1.035	1.046	1.047	1.033	1.014	1.064	1.082	1.021	1.051	1.047	1.065	1.075	1.096	1.051	0.908	0.885	0.861	0.818	0.808	0.824	0.793	0.796	0.833	0.84	0.863	0.867	0.834	0.82	0.804	0.801	0.83	0.794	0.851	0.853	0.522	0.557	0.543	0.541
	08:35:06	0.073	0.073	0.07	0.07	1.032	1.071	1.044	1.02	1.025	1.035	1.035	1.053	1.033	1.014	1.009	1.063	1.085	1.027	1.056	1.051	1.072	1.078	1.102	1.043	0.91	0.892	0.875	0.825	0.812	0.836	0.802	0.788	0.841	0.841	0.859	0.874	0.848	0.831	0.813	0.805	0.843	0.794	0.862	0.851	0.52	0.553	0.538	0.535
	08:40:06	0.077	0.075	0.072	0.072	1.047	1.077	1.053	1.028	1.034	1.038	1.04	1.062	1.051	1.042	1.017	1.065	1.084	1.029	1.055	1.054	1.068	1.087	1.1	1.056	0.923	0.901	0.881	0.841	0.832	0.845	0.812	0.819	0.854	0.863	0.88	0.886	0.856	0.843	0.829	0.827	0.855	0.811	0.881	0.872	0.53	0.561	0.547	0.545
	08:45:06	0.073	0.073	0.071	0.071	1.047	1.082	1.056	1.032	1.038	1.043	1.043	1.073	1.06	1.046	1.018	1.066	1.093	1.04	1.066	1.06	1.075	1.092	1.107	1.061	0.93	0.916	0.895	0.85	0.839	0.848	0.81	0.815	0.864	0.873	0.881	0.892	0.871	0.854	0.838	0.834	0.866	0.818	0.886	0.877	0.528	0.559	0.545	0.542
	08:50:06	0.072	0.073	0.07	0.071	1.051	1.088	1.064	1.042	1.045	1.049	1.052	1.084	1.064	1.053	1.027	1.076	1.101	1.047	1.075	1.07	1.085	1.106	1.115	1.066	0.94	0.928	0.909	0.863	0.851	0.858	0.818	0.821	0.874	0.885	0.895	0.907	0.885	0.871	0.852	0.849	0.883	0.829	0.902	0.891	0.535	0.566	0.551	0.548
	08:55:06	0.072	0.073	0.07	0.07	1.057	1.088	1.06	1.045	1.056	1.065	1.061	1.093	1.069	1.039	1.028	1.078	1.103	1.045	1.081	1.076	1.092	1.109	1.121	1.069	0.942	0.933	0.916	0.871	0.862	0.86	0.827	0.832	0.885	0.892	0.9	0.921	0.894	0.879	0.863	0.847	0.889	0.831	0.91	0.896	0.539	0.57	0.554	0.552
	09:00:06	0.074	0.074	0.071	0.071	1.056	1.092	1.074	1.054	1.059	1.063	1.062	1.096	1.064	1.043	1.035	1.086	1.105	1.054	1.081	1.078	1.092	1.119	1.124	1.077	0.947	0.944	0.923	0.885	0.876	0.884	0.847	0.847	0.9	0.9	0.905	0.922	0.899	0.885	0.87	0.87	0.899	0.848	0.925	0.904	0.544	0.575	0.559	0.557
	09:05:06	0.075	0.074	0.071	0.071	1.064	1.101	1.08	1.06	1.066	1.07	1.067	1.108	1.081	1.061	1.043	1.09	1.112	1.062	1.087	1.084	1.093	1.133	1.133	1.087	0.957	0.954	0.934	0.894	0.885	0.883	0.845	0.853	0.909	0.918	0.916	0.934	0.912	0.899	0.883	0.883	0.912	0.859	0.94	0.923	0.553	0.581	0.565	0.562
	09:10:06	0.074	0.074	0.071	0.071	1.076	1.104	1.084	1.064	1.07	1.073	1.074	1.117	1.086	1.071	1.048	1.095	1.115	1.068	1.094	1.088	1.1	1.142	1.132	1.088	0.97	0.962	0.945	0.906	0.896	0.898	0.864	0.867	0.918	0.92	0.929	0.943	0.922	0.908	0.893	0.893	0.925	0.87	0.948	0.932	0.559	0.589	0.572	0.569
	09:15:06	0.074	0.074	0.071	0.071	1.074	1.104	1.089	1.07	1.076	1.078	1.076	1.122	1.085	1.072	1.049	1.097	1.116	1.073	1.096	1.091	1.102	1.146	1.134	1.087	0.974	0.967	0.95	0.914	0.906	0.908	0.872	0.882	0.925	0.927	0.935	0.946	0.928	0.915	0.901	0.903	0.933	0.881	0.955	0.937	0.566	0.594	0.577	0.574
	09:20:06	0.075	0.074	0.071	0.071	1.073	1.112	1.095	1.074	1.082	1.079	1.082	1.125	1.092	1.072	1.061	1.104	1.119	1.073	1.096	1.097	1.102	1.158	1.139	1.092	0.979	0.972	0.953	0.92	0.913	0.921	0.891	0.895	0.936	0.937	0.947	0.957	0.933	0.921	0.906	0.911	0.941	0.885	0.967	0.948	0.572	0.602	0.585	0.581
	09:25:06	0.081	0.077	0.073	0.073	1.073	1.114	1.1	1.08	1.089	1.09	1.084	1.14	1.093	1.079	1.061	1.106	1.126	1.084	1.104	1.098	1.103	1.163	1.137	1.093	0.981	0.982	0.963	0.93	0.926	0.929	0.899	0.904	0.941	0.94	0.95	0.962	0.947	0.933	0.918	0.921	0.949	0.897	0.97	0.956	0.582	0.609	0.591	0.587
	09:30:06	0.074	0.073	0.071	0.071	1.082	1.122	1.104	1.082	1.091	1.092	1.089	1.14	1.098	1.083	1.066	1.11	1.131	1.087	1.109	1.107	1.112	1.169	1.149	1.096	0.993	0.995	0.978	0.943	0.933	0.94	0.906	0.917	0.952	0.954	0.958	0.975	0.959	0.944	0.931	0.934	0.964	0.908	0.981	0.959	0.577	0.605	0.588	0.585
	09:35:06	0.075	0.074	0.071	0.071	1.078	1.123	1.11	1.091	1.099	1.095	1.093	1.142	1.105	1.088	1.071	1.115	1.133	1.091	1.113	1.11	1.114	1.171	1.149	1.1	0.998	1.004	0.986	0.953	0.946	0.95	0.918	0.929	0.965	0.964	0.966	0.984	0.97	0.955	0.942	0.947	0.975	0.918	0.991	0.972	0.586	0.614	0.596	0.592
	09:40:06	0.074	0.074	0.071	0.071	1.081	1.127	1.111	1.093	1.101	1.102	1.096	1.144	1.1	1.081	1.075	1.118	1.134	1.091	1.114	1.11	1.122	1.17	1.151	1.102	1.009	1.01	0.994	0.957	0.95	0.953	0.918	0.936	0.968	0.972	0.977	0.995	0.98	0.965	0.949	0.953	0.982	0.927	0.999	0.979	0.58	0.608	0.591	0.588
	09:45:06	0.075	0.074	0.071	0.071	1.085	1.126	1.115	1.1	1.108	1.109	1.104	1.148	1.11	1.09	1.083	1.126	1.143	1.104	1.124	1.121	1.121	1.182	1.154	1.106	1.017	1.02	1.002	0.97	0.964	0.97	0.937	0.951	0.983	0.978	0.985	1.003	0.99	0.974	0.962	0.967	0.993	0.938	1.011	0.988	0.589	0.618	0.6	0.597
	09:50:06	0.076	0.075	0.072	0.072	1.075	1.123	1.111	1.099	1.106	1.107	1.098	1.151	1.106	1.085	1.088	1.127	1.143	1.105	1.124	1.123	1.119	1.184	1.146	1.103	1.015	1.018	1.002	0.972	0.966	0.973	0.941	0.955	0.982	0.978	0.989	1.006	0.992	0.974	0.961	0.969	0.998	0.949	1.017	0.988	0.605	0.63	0.611	0.606
	09:55:06	0.075	0.074	0.071	0.071	1.083	1.128	1.114	1.106	1.109	1.114	1.106	1.155	1.113	1.089	1.089	1.133	1.144	1.107	1.128	1.126	1.125	1.184	1.156	1.111	1.024	1.031	1.011	0.981	0.977	0.984	0.952	0.971	0.995	0.993	0.997	1.015	1	0.986	0.974	0.982	1.007	0.959	1.026	1.001	0.601	0.627	0.609	0.607
	10:00:06	0.074	0.074	0.071	0.071	1.081	1.126	1.116	1.108	1.111	1.116	1.107	1.16	1.111	1.089	1.09	1.135	1.145	1.109	1.128	1.128	1.124	1.187	1.157	1.109	1.031	1.036	1.018	0.988	0.986	0.993	0.962	0.979	1.003	0.999	1.005	1.021	1.005	0.992	0.98	0.99	1.013	0.969	1.034	1.006	0.609	0.635	0.615	0.613
	10:05:06	0.075	0.074	0.071	0.071	1.074	1.127	1.117	1.111	1.113	1.119	1.109	1.164	1.111	1.088	1.091	1.139	1.149	1.115	1.133	1.13	1.129	1.184	1.159	1.113	1.034	1.043	1.023	0.999	0.995	1.002	0.974	0.988	1.011	1.006	1.008	1.024	1.014	1	0.987	0.998	1.019	0.978	1.039	1.014	0.617	0.644	0.625	0.621
	10:10:06	0.075	0.074	0.071	0.071	1.076	1.124	1.115	1.111	1.113	1.115	1.115	1.163	1.11	1.089	1.095	1.141	1.151	1.118	1.136	1.133	1.126	1.193	1.16	1.112	1.039	1.046	1.03	1.005	1.001	1.006	0.982	0.996	1.016	1.009	1.018	1.037	1.022	1.008	0.996	1.006	1.029	0.987	1.05	1.02	0.619	0.647	0.626	0.623
	10:15:06	0.073	0.073	0.071	0.071	1.073	1.126	1.114	1.112	1.114	1.12	1.111	1.16	1.094	1.071	1.096	1.141	1.156	1.125	1.141	1.136	1.133	1.185	1.163	1.102	1.043	1.047	1.034	1.011	1.009	1.015	0.99	1.01	1.024	1.017	1.02	1.041	1.032	1.017	1.009	1.016	1.036	0.995	1.051	1.018	0.611	0.643	0.625	0.622
	10:20:06	0.073	0.073	0.071	0.071	1.08	1.121	1.113	1.111	1.113	1.12	1.114	1.163	1.11	1.088	1.091	1.144	1.157	1.125	1.143	1.14	1.131	1.197	1.161	1.11	1.046	1.055	1.039	1.016	1.012	1.019	0.997	1.011	1.028	1.022	1.025	1.045	1.034	1.021	1.01	1.022	1.043	1.004	1.061	1.031	0.627	0.655	0.635	0.632
	10:25:06	0.074	0.074	0.071	0.071	1.077	1.122	1.112	1.11	1.112	1.118	1.111	1.162	1.103	1.079	1.097	1.147	1.162	1.127	1.148	1.144	1.134	1.192	1.163	1.11	1.054	1.065	1.052	1.025	1.023	1.019	1.004	1.025	1.037	1.028	1.035	1.055	1.046	1.032	1.019	1.029	1.053	1.016	1.068	1.041	0.62	0.653	0.635	0.632
	10:30:06	0.079	0.077	0.073	0.073	1.08	1.122	1.113	1.11	1.113	1.116	1.113	1.161	1.106	1.084	1.102	1.15	1.164	1.132	1.149	1.148	1.128	1.197	1.156	1.104	1.055	1.069	1.051	1.031	1.029	1.037	1.014	1.031	1.041	1.03	1.043	1.063	1.05	1.033	1.024	1.037	1.058	1.023	1.072	1.04	0.638	0.666	0.647	0.644
	10:35:06	0.073	0.074	0.071	0.071	1.072	1.118	1.111	1.109	1.112	1.113	1.11	1.158	1.099	1.08	1.097	1.144	1.164	1.129	1.15	1.149	1.134	1.2	1.164	1.104	1.053	1.072	1.057	1.037	1.036	1.046	1.025	1.041	1.051	1.038	1.036	1.061	1.054	1.038	1.027	1.038	1.061	1.03	1.074	1.045	0.629	0.659	0.644	0.642
	10:40:06	0.074	0.074	0.071	0.071	1.071	1.115	1.105	1.103	1.107	1.108	1.106	1.152	1.084	1.065	1.098	1.147	1.161	1.131	1.15	1.149	1.13	1.194	1.157	1.093	1.061	1.07	1.061	1.041	1.038	1.048	1.026	1.047	1.053	1.038	1.042	1.069	1.062	1.048	1.036	1.048	1.062	1.04	1.076	1.036	0.638	0.668	0.651	0.648
	10:45:06	0.074	0.074	0.071	0.071	1.07	1.119	1.109	1.106	1.109	1.113	1.11	1.146	1.091	1.067	1.098	1.142	1.159	1.127	1.148	1.142	1.132	1.186	1.159	1.103	1.07	1.078	1.064	1.048	1.047	1.053	1.029	1.055	1.06	1.041	1.053	1.075	1.066	1.051	1.043	1.055	1.071	1.046	1.084	1.051	0.637	0.669	0.652	0.651
	10:50:06	0.074	0.074	0.071	0.071	1.078	1.117	1.113	1.111	1.115	1.118	1.116	1.139	1.105	1.086	1.1	1.143	1.166	1.135	1.153	1.153	1.133	1.182	1.158	1.101	1.072	1.084	1.074	1.057	1.056	1.064	1.045	1.064	1.065	1.053	1.056	1.083	1.076	1.057	1.05	1.062	1.084	1.061	1.094	1.062	0.641	0.674	0.658	0.656
	10:55:06	0.075	0.075	0.072	0.072	1.083	1.114	1.108	1.105	1.109	1.115	1.108	1.143	1.101	1.086	1.095	1.142	1.161	1.127	1.149	1.148	1.132	1.18	1.153	1.102	1.076	1.09	1.077	1.06	1.058	1.064	1.043	1.069	1.07	1.055	1.062	1.082	1.078	1.063	1.055	1.066	1.083	1.064	1.096	1.064	0.648	0.681	0.665	0.664
	11:00:06	0.074	0.074	0.071	0.071	1.082	1.118	1.114	1.11	1.113	1.112	1.111	1.14	1.092	1.072	1.101	1.146	1.164	1.128	1.153	1.142	1.141	1.171	1.157	1.101	1.083	1.098	1.086	1.07	1.069	1.076	1.057	1.083	1.08	1.066	1.07	1.093	1.086	1.072	1.065	1.078	1.096	1.077	1.105	1.068	0.645	0.676	0.661	0.661
	11:05:06	0.077	0.076	0.072	0.072	1.086	1.124	1.112	1.109	1.109	1.11	1.11	1.137	1.094	1.08	1.103	1.151	1.164	1.126	1.154	1.144	1.14	1.157	1.144	1.098	1.093	1.106	1.092	1.075	1.074	1.084	1.063	1.094	1.085	1.07	1.081	1.102	1.095	1.082	1.074	1.086	1.103	1.088	1.114	1.081	0.65	0.685	0.67	0.671
	11:10:06	0.073	0.074	0.071	0.071	1.081	1.12	1.114	1.11	1.113	1.118	1.111	1.132	1.099	1.083	1.098	1.146	1.163	1.131	1.153	1.145	1.14	1.156	1.152	1.1	1.087	1.107	1.096	1.079	1.078	1.085	1.066	1.097	1.086	1.075	1.08	1.1	1.098	1.084	1.076	1.089	1.105	1.094	1.115	1.082	0.655	0.689	0.674	0.675
	11:15:06	0.073	0.074	0.07	0.071	1.084	1.12	1.114	1.109	1.114	1.116	1.109	1.128	1.099	1.082	1.101	1.144	1.164	1.13	1.154	1.142	1.142	1.149	1.156	1.106	1.091	1.11	1.102	1.087	1.085	1.09	1.072	1.106	1.091	1.076	1.083	1.106	1.103	1.088	1.08	1.094	1.109	1.101	1.121	1.084	0.662	0.696	0.681	0.681
	11:20:06	0.075	0.075	0.072	0.072	1.094	1.126	1.121	1.118	1.121	1.122	1.121	1.127	1.104	1.09	1.108	1.152	1.173	1.137	1.165	1.155	1.15	1.149	1.156	1.105	1.102	1.12	1.108	1.091	1.09	1.099	1.081	1.116	1.1	1.087	1.094	1.118	1.113	1.098	1.092	1.105	1.122	1.111	1.132	1.096	0.663	0.704	0.691	0.691
	11:25:06	0.078	0.077	0.073	0.073	1.092	1.123	1.116	1.112	1.115	1.119	1.115	1.127	1.102	1.092	1.105	1.148	1.168	1.132	1.159	1.149	1.146	1.142	1.152	1.104	1.1	1.121	1.11	1.094	1.094	1.102	1.083	1.12	1.1	1.086	1.098	1.118	1.115	1.099	1.093	1.106	1.123	1.117	1.129	1.094	0.668	0.707	0.693	0.695
	11:30:06	0.074	0.074	0.071	0.071	1.092	1.116	1.111	1.108	1.112	1.12	1.11	1.119	1.102	1.092	1.096	1.135	1.153	1.123	1.148	1.138	1.132	1.137	1.146	1.103	1.092	1.113	1.107	1.093	1.091	1.096	1.081	1.117	1.095	1.079	1.092	1.114	1.113	1.099	1.09	1.103	1.114	1.12	1.125	1.09	0.672	0.715	0.7	0.699
	11:35:06	0.074	0.074	0.072	0.071	1.089	1.121	1.115	1.111	1.114	1.115	1.107	1.119	1.097	1.09	1.098	1.138	1.155	1.125	1.149	1.139	1.135	1.132	1.148	1.103	1.098	1.116	1.106	1.09	1.09	1.099	1.083	1.125	1.1	1.085	1.092	1.115	1.111	1.098	1.091	1.105	1.119	1.122	1.128	1.094	0.675	0.717	0.703	0.702
	11:40:06	0.074	0.074	0.071	0.071	1.088	1.123	1.117	1.113	1.115	1.116	1.113	1.12	1.099	1.09	1.101	1.138	1.156	1.125	1.149	1.141	1.137	1.125	1.148	1.107	1.098	1.121	1.108	1.097	1.097	1.106	1.09	1.132	1.106	1.091	1.099	1.121	1.118	1.101	1.098	1.111	1.122	1.128	1.131	1.099	0.681	0.719	0.706	0.706
	11:45:06	0.074	0.074	0.071	0.071	1.094	1.116	1.112	1.109	1.112	1.118	1.104	1.115	1.098	1.093	1.102	1.138	1.156	1.129	1.15	1.138	1.134	1.12	1.146	1.108	1.096	1.122	1.113	1.103	1.103	1.108	1.093	1.133	1.106	1.09	1.102	1.125	1.123	1.108	1.101	1.116	1.125	1.135	1.134	1.096	0.685	0.722	0.71	0.709
	11:50:06	0.074	0.074	0.071	0.071	1.096	1.123	1.12	1.116	1.118	1.121	1.108	1.109	1.101	1.096	1.103	1.137	1.159	1.131	1.15	1.139	1.135	1.118	1.145	1.11	1.096	1.127	1.116	1.108	1.108	1.115	1.1	1.14	1.108	1.089	1.105	1.131	1.128	1.114	1.11	1.124	1.128	1.137	1.136	1.101	0.681	0.723	0.71	0.71
	11:55:06	0.074	0.074	0.071	0.071	1.091	1.124	1.118	1.114	1.117	1.116	1.115	1.104	1.103	1.098	1.105	1.14	1.156	1.129	1.153	1.14	1.136	1.117	1.148	1.112	1.097	1.128	1.116	1.11	1.111	1.118	1.102	1.144	1.116	1.096	1.105	1.133	1.129	1.116	1.114	1.127	1.13	1.147	1.143	1.104	0.686	0.725	0.713	0.714
	12:00:06	0.075	0.075	0.072	0.072	1.094	1.119	1.119	1.116	1.121	1.117	1.11	1.101	1.106	1.103	1.102	1.131	1.152	1.129	1.15	1.135	1.133	1.116	1.148	1.115	1.097	1.122	1.119	1.116	1.117	1.118	1.108	1.141	1.113	1.089	1.103	1.125	1.137	1.118	1.118	1.132	1.132	1.155	1.136	1.099	0.694	0.726	0.715	0.717
[truncated: 36 more columns]

## Sheet: dLTGRep1
	Media	LB	LB+IPTG	LB0N	LB0N+IPTG	LB	LB	LB	LB	LB	LB	LB	LB	LB	LB+IPTG	LB+IPTG	LB+IPTG	LB+IPTG	LB+IPTG	LB+IPTG	LB+IPTG	LB+IPTG	LB+IPTG	LB	LB	LB	LB	LB	LB	LB	LB	LB	LB+IPTG	LB+IPTG	LB+IPTG	LB+IPTG	LB+IPTG	LB+IPTG	LB+IPTG	LB+IPTG	LB+IPTG	LB0N	LB0N	LB0N	LB0N	LB0N	LB0N	LB0N	LB0N
	Dilution Factor	Blank	Blank	Blank	Blank	0.001	0.001	0.001	0.001	0.001	0.001	0.001	0.001	0.001	0.001	0.001	0.001	0.001	0.001	0.001	0.001	0.001	0.001	1e-05	1e-05	1e-05	1e-05	1e-05	1e-05	1e-05	1e-05	1e-05	1e-05	1e-05	1e-05	1e-05	1e-05	1e-05	1e-05	1e-05	1e-05	0.001	0.001	0.001	0.001	0.001	0.001	0.001	0.001
	Background	N/A	N/A	N/A	N/A	WT	d6 LTG	d6 LTG	d6 LTG	d6 LTG	d6 LTG	d6 LTG	d6 LTG	d6 LTG	WT	d6 LTG	d6 LTG	d6 LTG	d6 LTG	d6 LTG	d6 LTG	d6 LTG	d6 LTG	WT	d6 LTG	d6 LTG	d6 LTG	d6 LTG	d6 LTG	d6 LTG	d6 LTG	d6 LTG	WT	d6 LTG	d6 LTG	d6 LTG	d6 LTG	d6 LTG	d6 LTG	d6 LTG	d6 LTG	WT	d6 LTG	d6 LTG	d6 LTG	d6 LTG	d6 LTG	d6 LTG	d6 LTG
	Ptac	N/A	N/A	N/A	N/A	empty	empty	mltA	mltB	mltC	mltD	mltF	slt70	EcmltE	empty	empty	mltA	mltB	mltC	mltD	mltF	slt70	EcmltE	empty	empty	mltA	mltB	mltC	mltD	mltF	slt70	EcmltE	empty	empty	mltA	mltB	mltC	mltD	mltF	slt70	EcmltE	empty	empty	mltA	mltB	mltC	mltD	mltF	slt70
	hr:min:sec
	00:01:17	0.068	0.066	0.071	0.073	0.071	0.069	0.069	0.068	0.067	0.068	0.069	0.07	0.068	0.07	0.069	0.068	0.067	0.066	0.067	0.067	0.069	0.067	0.069	0.067	0.066	0.066	0.066	0.066	0.066	0.066	0.069	0.069	0.066	0.065	0.065	0.065	0.065	0.065	0.065	0.066	0.072	0.08	0.068	0.067	0.068	0.068	0.069	0.069
	00:05:06	0.065	0.064	0.069	0.071	0.069	0.068	0.067	0.067	0.066	0.066	0.068	0.069	0.067	0.068	0.067	0.066	0.065	0.065	0.065	0.067	0.068	0.066	0.067	0.066	0.065	0.065	0.065	0.065	0.065	0.066	0.068	0.066	0.064	0.064	0.063	0.064	0.063	0.064	0.064	0.064	0.07	0.075	0.067	0.066	0.066	0.066	0.068	0.067
	00:10:06	0.066	0.065	0.068	0.071	0.069	0.068	0.068	0.066	0.066	0.066	0.069	0.069	0.067	0.069	0.068	0.066	0.065	0.065	0.065	0.067	0.068	0.066	0.067	0.066	0.064	0.065	0.065	0.064	0.065	0.066	0.068	0.066	0.064	0.064	0.064	0.064	0.064	0.064	0.064	0.065	0.07	0.074	0.067	0.066	0.067	0.066	0.068	0.067
	00:15:06	0.065	0.065	0.068	0.071	0.07	0.068	0.068	0.066	0.066	0.067	0.068	0.069	0.067	0.069	0.068	0.066	0.065	0.065	0.066	0.067	0.069	0.066	0.067	0.066	0.064	0.065	0.065	0.064	0.065	0.065	0.068	0.066	0.064	0.064	0.063	0.064	0.064	0.064	0.064	0.065	0.07	0.072	0.067	0.066	0.066	0.066	0.068	0.067
	00:20:06	0.065	0.065	0.068	0.071	0.07	0.068	0.068	0.066	0.066	0.066	0.069	0.069	0.067	0.07	0.068	0.066	0.065	0.065	0.066	0.067	0.07	0.067	0.067	0.065	0.064	0.065	0.065	0.064	0.065	0.065	0.068	0.066	0.064	0.064	0.064	0.064	0.064	0.064	0.064	0.065	0.07	0.071	0.067	0.066	0.067	0.066	0.068	0.067
	00:25:06	0.066	0.065	0.068	0.071	0.071	0.069	0.068	0.066	0.067	0.067	0.069	0.07	0.068	0.071	0.068	0.066	0.066	0.065	0.066	0.067	0.07	0.067	0.067	0.066	0.064	0.065	0.065	0.065	0.065	0.066	0.068	0.067	0.065	0.064	0.064	0.064	0.064	0.064	0.064	0.065	0.07	0.071	0.067	0.066	0.067	0.066	0.068	0.067
	00:30:06	0.066	0.065	0.068	0.071	0.071	0.069	0.068	0.066	0.067	0.067	0.07	0.07	0.068	0.072	0.069	0.067	0.066	0.065	0.066	0.068	0.071	0.068	0.067	0.065	0.064	0.065	0.065	0.064	0.065	0.065	0.068	0.066	0.064	0.064	0.064	0.064	0.064	0.064	0.064	0.065	0.07	0.07	0.067	0.066	0.067	0.066	0.068	0.067
	00:35:05	0.066	0.065	0.068	0.071	0.072	0.069	0.069	0.066	0.067	0.068	0.07	0.071	0.068	0.073	0.069	0.067	0.066	0.066	0.067	0.069	0.073	0.068	0.067	0.065	0.064	0.065	0.065	0.064	0.065	0.065	0.068	0.066	0.064	0.064	0.064	0.064	0.064	0.065	0.064	0.065	0.071	0.07	0.067	0.066	0.067	0.066	0.068	0.067
	00:40:06	0.066	0.065	0.068	0.071	0.073	0.07	0.07	0.067	0.068	0.068	0.071	0.072	0.069	0.075	0.07	0.068	0.067	0.066	0.067	0.07	0.074	0.069	0.067	0.065	0.064	0.065	0.065	0.064	0.065	0.065	0.068	0.067	0.065	0.064	0.064	0.064	0.064	0.064	0.064	0.065	0.07	0.07	0.067	0.066	0.067	0.066	0.068	0.067
	00:45:06	0.067	0.066	0.069	0.072	0.076	0.071	0.071	0.068	0.069	0.069	0.072	0.073	0.071	0.078	0.072	0.07	0.068	0.068	0.069	0.072	0.076	0.071	0.068	0.066	0.065	0.065	0.065	0.065	0.065	0.066	0.069	0.067	0.065	0.064	0.065	0.064	0.064	0.065	0.065	0.066	0.071	0.07	0.067	0.067	0.067	0.067	0.069	0.068
	00:50:06	0.066	0.065	0.068	0.071	0.077	0.071	0.071	0.068	0.068	0.069	0.072	0.074	0.07	0.08	0.071	0.07	0.068	0.068	0.069	0.073	0.078	0.071	0.067	0.065	0.064	0.065	0.065	0.064	0.065	0.065	0.068	0.067	0.065	0.064	0.064	0.064	0.064	0.064	0.064	0.065	0.07	0.069	0.067	0.066	0.067	0.066	0.068	0.067
	00:55:06	0.067	0.067	0.069	0.072	0.079	0.073	0.072	0.069	0.07	0.071	0.075	0.076	0.073	0.085	0.073	0.072	0.07	0.07	0.071	0.076	0.082	0.074	0.068	0.066	0.065	0.065	0.065	0.065	0.065	0.067	0.069	0.067	0.065	0.065	0.064	0.065	0.064	0.065	0.065	0.066	0.071	0.07	0.067	0.067	0.067	0.067	0.068	0.068
	01:00:06	0.066	0.066	0.068	0.072	0.081	0.073	0.073	0.07	0.07	0.071	0.075	0.076	0.073	0.089	0.073	0.074	0.07	0.07	0.071	0.077	0.085	0.075	0.068	0.066	0.064	0.065	0.065	0.065	0.065	0.066	0.068	0.067	0.065	0.064	0.064	0.064	0.064	0.065	0.064	0.065	0.07	0.07	0.067	0.067	0.067	0.066	0.068	0.068
	01:05:06	0.066	0.066	0.068	0.072	0.084	0.074	0.075	0.071	0.071	0.072	0.077	0.078	0.074	0.095	0.075	0.076	0.071	0.071	0.073	0.081	0.09	0.077	0.067	0.066	0.064	0.065	0.065	0.064	0.065	0.065	0.068	0.067	0.065	0.064	0.064	0.064	0.064	0.064	0.064	0.065	0.07	0.07	0.067	0.067	0.067	0.066	0.068	0.067
	01:10:06	0.067	0.067	0.068	0.072	0.089	0.076	0.077	0.072	0.073	0.074	0.08	0.081	0.077	0.103	0.079	0.079	0.074	0.074	0.076	0.085	0.097	0.081	0.068	0.066	0.065	0.065	0.065	0.065	0.065	0.066	0.069	0.068	0.065	0.064	0.064	0.064	0.064	0.065	0.065	0.066	0.071	0.071	0.068	0.067	0.067	0.067	0.069	0.068
	01:15:06	0.066	0.066	0.068	0.072	0.092	0.078	0.079	0.074	0.073	0.076	0.081	0.083	0.078	0.111	0.082	0.083	0.076	0.076	0.078	0.09	0.103	0.084	0.068	0.066	0.064	0.065	0.065	0.064	0.065	0.066	0.068	0.067	0.065	0.064	0.064	0.064	0.064	0.065	0.065	0.065	0.071	0.07	0.068	0.067	0.067	0.067	0.068	0.068
	01:20:06	0.066	0.066	0.068	0.072	0.098	0.08	0.082	0.076	0.075	0.077	0.085	0.087	0.08	0.121	0.085	0.087	0.08	0.079	0.082	0.096	0.112	0.089	0.068	0.066	0.064	0.065	0.065	0.065	0.065	0.066	0.068	0.068	0.065	0.065	0.065	0.064	0.065	0.065	0.065	0.066	0.071	0.07	0.068	0.068	0.067	0.067	0.068	0.068
	01:25:06	0.066	0.067	0.068	0.072	0.105	0.084	0.085	0.079	0.077	0.081	0.089	0.091	0.084	0.137	0.09	0.094	0.084	0.084	0.087	0.105	0.125	0.095	0.068	0.066	0.065	0.065	0.065	0.065	0.065	0.066	0.069	0.068	0.065	0.065	0.065	0.064	0.064	0.065	0.065	0.066	0.071	0.07	0.068	0.067	0.068	0.067	0.068	0.068
	01:30:06	0.066	0.067	0.069	0.072	0.115	0.087	0.09	0.082	0.08	0.084	0.094	0.096	0.089	0.161	0.096	0.101	0.089	0.089	0.093	0.114	0.14	0.103	0.068	0.066	0.064	0.065	0.065	0.065	0.065	0.066	0.069	0.068	0.065	0.065	0.064	0.064	0.064	0.065	0.065	0.066	0.072	0.07	0.068	0.068	0.068	0.067	0.069	0.068
	01:35:06	0.066	0.066	0.068	0.072	0.126	0.092	0.095	0.085	0.083	0.088	0.099	0.102	0.093	0.179	0.104	0.11	0.094	0.094	0.1	0.126	0.161	0.112	0.068	0.066	0.064	0.065	0.065	0.065	0.065	0.066	0.068	0.068	0.065	0.064	0.064	0.064	0.064	0.065	0.064	0.065	0.071	0.07	0.068	0.068	0.068	0.067	0.068	0.068
	01:40:06	0.066	0.067	0.069	0.072	0.141	0.097	0.102	0.09	0.087	0.093	0.106	0.11	0.099	0.199	0.114	0.124	0.103	0.103	0.109	0.141	0.179	0.124	0.068	0.066	0.065	0.065	0.065	0.065	0.065	0.066	0.069	0.068	0.065	0.065	0.065	0.064	0.064	0.065	0.065	0.066	0.072	0.071	0.069	0.068	0.068	0.068	0.069	0.069
	01:45:06	0.067	0.067	0.069	0.072	0.157	0.104	0.11	0.095	0.092	0.1	0.116	0.12	0.107	0.215	0.126	0.14	0.113	0.113	0.121	0.162	0.196	0.14	0.069	0.066	0.065	0.065	0.065	0.065	0.065	0.066	0.069	0.069	0.065	0.065	0.065	0.065	0.065	0.065	0.065	0.066	0.072	0.071	0.069	0.068	0.068	0.068	0.069	0.069
	01:50:06	0.066	0.067	0.068	0.072	0.175	0.113	0.12	0.102	0.098	0.107	0.127	0.132	0.116	0.231	0.142	0.159	0.126	0.126	0.135	0.183	0.216	0.16	0.069	0.066	0.065	0.065	0.065	0.065	0.065	0.066	0.069	0.069	0.065	0.065	0.065	0.065	0.065	0.066	0.065	0.066	0.073	0.071	0.069	0.069	0.069	0.068	0.069	0.069
	01:55:06	0.067	0.067	0.069	0.072	0.192	0.123	0.133	0.112	0.106	0.118	0.142	0.148	0.129	0.251	0.16	0.185	0.141	0.14	0.155	0.202	0.245	0.183	0.069	0.066	0.065	0.065	0.065	0.065	0.065	0.066	0.069	0.07	0.066	0.065	0.065	0.065	0.065	0.066	0.066	0.067	0.073	0.071	0.07	0.069	0.069	0.068	0.069	0.07
	02:00:06	0.067	0.067	0.068	0.072	0.216	0.136	0.149	0.123	0.115	0.13	0.159	0.164	0.143	0.273	0.184	0.197	0.161	0.159	0.175	0.218	0.261	0.197	0.07	0.066	0.065	0.065	0.065	0.065	0.065	0.066	0.069	0.07	0.066	0.066	0.065	0.065	0.065	0.066	0.066	0.067	0.073	0.072	0.07	0.07	0.069	0.068	0.069	0.07
	02:05:06	0.067	0.067	0.068	0.072	0.233	0.152	0.167	0.137	0.127	0.145	0.177	0.182	0.16	0.29	0.194	0.211	0.183	0.18	0.191	0.234	0.277	0.214	0.07	0.067	0.065	0.066	0.066	0.065	0.066	0.067	0.069	0.071	0.066	0.066	0.065	0.065	0.065	0.067	0.067	0.067	0.074	0.072	0.071	0.07	0.069	0.069	0.069	0.07
	02:10:06	0.068	0.068	0.069	0.073	0.257	0.169	0.186	0.154	0.142	0.162	0.196	0.195	0.175	0.319	0.22	0.238	0.201	0.198	0.212	0.267	0.318	0.243	0.071	0.067	0.066	0.066	0.066	0.066	0.066	0.067	0.07	0.073	0.067	0.067	0.066	0.066	0.066	0.067	0.068	0.068	0.075	0.074	0.072	0.071	0.07	0.069	0.069	0.072
	02:15:06	0.067	0.067	0.069	0.073	0.288	0.185	0.206	0.169	0.158	0.178	0.21	0.216	0.192	0.33	0.241	0.26	0.219	0.219	0.235	0.292	0.341	0.248	0.071	0.067	0.065	0.066	0.066	0.065	0.066	0.067	0.07	0.074	0.067	0.068	0.066	0.066	0.066	0.068	0.068	0.068	0.075	0.073	0.072	0.071	0.07	0.069	0.069	0.072
	02:20:06	0.067	0.067	0.069	0.072	0.3	0.214	0.235	0.191	0.174	0.202	0.234	0.241	0.222	0.34	0.256	0.261	0.237	0.242	0.25	0.313	0.333	0.271	0.072	0.067	0.065	0.066	0.066	0.066	0.066	0.067	0.07	0.076	0.068	0.069	0.067	0.066	0.066	0.068	0.069	0.069	0.075	0.073	0.073	0.072	0.07	0.07	0.069	0.072
	02:25:06	0.067	0.067	0.069	0.073	0.328	0.226	0.249	0.222	0.201	0.222	0.255	0.257	0.233	0.347	0.286	0.312	0.259	0.261	0.275	0.343	0.381	0.31	0.072	0.067	0.066	0.066	0.066	0.066	0.067	0.067	0.07	0.078	0.068	0.069	0.068	0.067	0.067	0.069	0.07	0.07	0.076	0.074	0.074	0.073	0.071	0.07	0.069	0.073
	02:30:06	0.069	0.07	0.07	0.074	0.322	0.25	0.261	0.227	0.204	0.232	0.272	0.283	0.265	0.35	0.316	0.339	0.287	0.292	0.308	0.364	0.362	0.336	0.074	0.068	0.067	0.067	0.067	0.067	0.068	0.069	0.072	0.082	0.07	0.071	0.069	0.068	0.068	0.071	0.072	0.072	0.078	0.075	0.075	0.074	0.072	0.071	0.07	0.074
	02:35:06	0.067	0.067	0.069	0.073	0.35	0.272	0.29	0.254	0.227	0.253	0.301	0.307	0.281	0.353	0.347	0.348	0.317	0.317	0.328	0.391	0.361	0.353	0.074	0.068	0.066	0.067	0.066	0.066	0.067	0.069	0.071	0.085	0.07	0.072	0.07	0.068	0.068	0.072	0.073	0.072	0.077	0.075	0.076	0.075	0.072	0.071	0.069	0.074
	02:40:06	0.068	0.068	0.069	0.073	0.375	0.299	0.309	0.27	0.252	0.277	0.315	0.323	0.305	0.354	0.345	0.359	0.335	0.334	0.332	0.371	0.358	0.38	0.076	0.068	0.067	0.067	0.067	0.067	0.068	0.07	0.071	0.09	0.072	0.074	0.071	0.069	0.07	0.074	0.075	0.074	0.078	0.076	0.077	0.077	0.073	0.072	0.069	0.075
	02:45:06	0.067	0.067	0.069	0.073	0.362	0.323	0.32	0.289	0.269	0.293	0.32	0.331	0.319	0.378	0.372	0.346	0.344	0.348	0.356	0.372	0.36	0.357	0.077	0.068	0.067	0.067	0.067	0.067	0.068	0.07	0.072	0.095	0.073	0.076	0.072	0.07	0.071	0.076	0.077	0.075	0.079	0.077	0.078	0.078	0.073	0.072	0.069	0.076
	02:50:06	0.067	0.068	0.069	0.073	0.349	0.337	0.349	0.315	0.296	0.32	0.353	0.372	0.347	0.381	0.37	0.351	0.371	0.378	0.359	0.389	0.365	0.364	0.08	0.069	0.068	0.068	0.067	0.067	0.07	0.071	0.072	0.102	0.075	0.079	0.075	0.071	0.072	0.079	0.08	0.078	0.081	0.078	0.08	0.08	0.074	0.073	0.07	0.078
	02:55:06	0.067	0.068	0.069	0.073	0.351	0.363	0.381	0.326	0.322	0.336	0.384	0.368	0.376	0.386	0.359	0.352	0.361	0.361	0.351	0.395	0.382	0.365	0.083	0.07	0.069	0.069	0.067	0.068	0.07	0.072	0.073	0.111	0.077	0.083	0.077	0.073	0.074	0.083	0.084	0.08	0.082	0.079	0.082	0.082	0.075	0.074	0.07	0.079
	03:00:06	0.067	0.068	0.069	0.073	0.34	0.404	0.368	0.341	0.333	0.367	0.369	0.359	0.379	0.382	0.36	0.356	0.358	0.355	0.352	0.401	0.387	0.363	0.086	0.07	0.07	0.069	0.068	0.069	0.072	0.073	0.074	0.122	0.079	0.087	0.08	0.074	0.076	0.087	0.089	0.084	0.084	0.08	0.084	0.084	0.076	0.075	0.07	0.081
	03:05:06	0.067	0.068	0.069	0.073	0.38	0.379	0.355	0.352	0.342	0.347	0.36	0.346	0.351	0.379	0.363	0.363	0.359	0.358	0.356	0.408	0.389	0.37	0.09	0.071	0.071	0.07	0.068	0.069	0.073	0.075	0.075	0.138	0.082	0.093	0.084	0.076	0.079	0.093	0.095	0.088	0.085	0.081	0.086	0.086	0.077	0.076	0.07	0.082
	03:10:06	0.067	0.067	0.069	0.073	0.368	0.369	0.363	0.348	0.344	0.342	0.361	0.355	0.353	0.381	0.363	0.36	0.362	0.36	0.356	0.416	0.389	0.383	0.095	0.072	0.072	0.071	0.069	0.07	0.075	0.076	0.077	0.156	0.087	0.1	0.088	0.079	0.082	0.099	0.102	0.092	0.087	0.082	0.088	0.088	0.078	0.077	0.069	0.084
	03:15:06	0.068	0.068	0.069	0.073	0.379	0.37	0.361	0.345	0.347	0.342	0.367	0.39	0.361	0.39	0.377	0.373	0.372	0.366	0.36	0.424	0.39	0.39	0.101	0.073	0.074	0.073	0.07	0.072	0.077	0.079	0.078	0.177	0.092	0.109	0.094	0.083	0.087	0.109	0.111	0.099	0.09	0.084	0.092	0.091	0.079	0.078	0.07	0.086
	03:20:06	0.068	0.068	0.069	0.073	0.395	0.384	0.406	0.349	0.345	0.347	0.404	0.373	0.392	0.391	0.387	0.377	0.372	0.373	0.367	0.428	0.391	0.381	0.109	0.075	0.077	0.075	0.071	0.073	0.08	0.082	0.081	0.197	0.098	0.119	0.102	0.087	0.092	0.12	0.122	0.107	0.092	0.085	0.095	0.095	0.08	0.079	0.07	0.089
	03:25:06	0.068	0.068	0.069	0.073	0.375	0.387	0.386	0.363	0.358	0.369	0.392	0.387	0.391	0.404	0.394	0.386	0.388	0.389	0.38	0.44	0.406	0.399	0.12	0.077	0.079	0.077	0.072	0.075	0.083	0.086	0.083	0.208	0.104	0.132	0.11	0.091	0.099	0.134	0.135	0.115	0.095	0.086	0.099	0.098	0.081	0.08	0.07	0.091
	03:30:06	0.069	0.069	0.07	0.074	0.392	0.388	0.392	0.378	0.361	0.377	0.395	0.385	0.383	0.409	0.4	0.39	0.393	0.392	0.382	0.445	0.412	0.398	0.132	0.08	0.083	0.08	0.074	0.078	0.088	0.09	0.088	0.234	0.113	0.151	0.122	0.098	0.109	0.153	0.152	0.127	0.099	0.089	0.103	0.103	0.083	0.082	0.07	0.094
	03:35:06	0.068	0.068	0.069	0.073	0.396	0.392	0.388	0.376	0.374	0.362	0.397	0.386	0.379	0.404	0.396	0.388	0.392	0.391	0.379	0.437	0.406	0.389	0.147	0.082	0.087	0.082	0.075	0.08	0.092	0.095	0.09	0.25	0.123	0.168	0.135	0.104	0.12	0.171	0.169	0.14	0.103	0.09	0.107	0.107	0.084	0.082	0.07	0.097
	03:40:06	0.068	0.068	0.069	0.073	0.393	0.397	0.398	0.386	0.387	0.385	0.408	0.397	0.397	0.423	0.406	0.397	0.405	0.398	0.39	0.457	0.43	0.404	0.162	0.085	0.092	0.086	0.077	0.084	0.099	0.102	0.096	0.278	0.136	0.184	0.152	0.114	0.133	0.188	0.189	0.158	0.107	0.091	0.112	0.112	0.085	0.084	0.07	0.1
	03:45:06	0.068	0.068	0.069	0.073	0.4	0.404	0.393	0.382	0.386	0.378	0.406	0.39	0.389	0.427	0.402	0.395	0.402	0.394	0.39	0.452	0.43	0.401	0.175	0.09	0.099	0.091	0.08	0.088	0.107	0.11	0.101	0.297	0.15	0.205	0.17	0.125	0.148	0.208	0.207	0.175	0.112	0.094	0.118	0.117	0.087	0.086	0.07	0.104
	03:50:06	0.068	0.068	0.069	0.073	0.408	0.41	0.403	0.389	0.396	0.387	0.414	0.402	0.402	0.44	0.413	0.408	0.416	0.404	0.403	0.47	0.449	0.411	0.195	0.095	0.107	0.097	0.083	0.093	0.118	0.121	0.109	0.326	0.167	0.232	0.187	0.14	0.169	0.247	0.232	0.194	0.117	0.095	0.125	0.123	0.089	0.087	0.071	0.108
	03:55:06	0.068	0.068	0.069	0.073	0.408	0.408	0.4	0.387	0.385	0.379	0.409	0.398	0.393	0.442	0.411	0.404	0.41	0.404	0.397	0.458	0.447	0.41	0.215	0.102	0.117	0.104	0.087	0.1	0.13	0.134	0.118	0.354	0.184	0.246	0.211	0.156	0.181	0.261	0.251	0.215	0.124	0.098	0.132	0.13	0.091	0.089	0.071	0.112
	04:00:06	0.068	0.068	0.069	0.073	0.419	0.408	0.403	0.389	0.384	0.382	0.412	0.399	0.394	0.445	0.414	0.412	0.411	0.403	0.401	0.456	0.451	0.407	0.234	0.11	0.129	0.113	0.092	0.108	0.144	0.149	0.13	0.376	0.204	0.265	0.227	0.173	0.202	0.277	0.268	0.227	0.131	0.1	0.14	0.137	0.093	0.091	0.071	0.116
	04:05:06	0.069	0.069	0.07	0.074	0.425	0.411	0.412	0.391	0.384	0.387	0.424	0.409	0.405	0.459	0.424	0.421	0.426	0.411	0.411	0.472	0.469	0.418	0.262	0.119	0.144	0.124	0.098	0.119	0.16	0.162	0.144	0.376	0.22	0.302	0.254	0.191	0.227	0.312	0.299	0.246	0.14	0.103	0.148	0.146	0.095	0.094	0.071	0.123
	04:10:06	0.068	0.068	0.069	0.073	0.434	0.411	0.409	0.395	0.387	0.386	0.423	0.408	0.405	0.465	0.424	0.419	0.425	0.411	0.411	0.473	0.471	0.42	0.285	0.131	0.158	0.138	0.105	0.131	0.172	0.179	0.156	0.357	0.234	0.324	0.275	0.212	0.249	0.331	0.327	0.266	0.148	0.106	0.158	0.154	0.097	0.095	0.071	0.127
	04:15:06	0.068	0.068	0.069	0.073	0.447	0.421	0.415	0.4	0.395	0.392	0.43	0.416	0.411	0.483	0.433	0.43	0.436	0.418	0.421	0.491	0.486	0.429	0.303	0.144	0.173	0.154	0.114	0.145	0.191	0.194	0.17	0.362	0.251	0.358	0.306	0.227	0.271	0.379	0.349	0.294	0.157	0.108	0.167	0.163	0.1	0.098	0.071	0.133
	04:20:06	0.068	0.068	0.069	0.073	0.45	0.426	0.422	0.405	0.396	0.396	0.436	0.423	0.416	0.494	0.438	0.436	0.44	0.422	0.427	0.501	0.496	0.434	0.326	0.155	0.194	0.165	0.124	0.157	0.201	0.214	0.188	0.364	0.273	0.366	0.333	0.242	0.294	0.384	0.364	0.315	0.168	0.112	0.178	0.173	0.103	0.101	0.071	0.139
	04:25:06	0.068	0.068	0.069	0.074	0.459	0.43	0.425	0.402	0.394	0.397	0.447	0.427	0.418	0.49	0.431	0.431	0.438	0.417	0.424	0.494	0.488	0.425	0.337	0.173	0.21	0.187	0.139	0.177	0.22	0.227	0.204	0.385	0.299	0.369	0.34	0.258	0.309	0.411	0.36	0.332	0.179	0.114	0.192	0.184	0.105	0.103	0.071	0.146
	04:30:06	0.068	0.068	0.07	0.074	0.469	0.432	0.425	0.407	0.401	0.4	0.448	0.429	0.423	0.515	0.443	0.441	0.448	0.425	0.431	0.512	0.506	0.44	0.357	0.195	0.227	0.207	0.154	0.196	0.24	0.249	0.222	0.37	0.316	0.367	0.376	0.286	0.351	0.405	0.364	0.35	0.192	0.117	0.2	0.195	0.108	0.106	0.071	0.153
	04:35:06	0.068	0.068	0.07	0.074	0.471	0.438	0.434	0.414	0.408	0.41	0.462	0.436	0.425	0.514	0.441	0.439	0.448	0.427	0.434	0.519	0.504	0.441	0.374	0.209	0.239	0.217	0.167	0.207	0.258	0.265	0.241	0.375	0.34	0.358	0.365	0.312	0.364	0.392	0.357	0.363	0.199	0.12	0.208	0.204	0.111	0.109	0.072	0.161
	04:40:06	0.069	0.069	0.07	0.075	0.497	0.454	0.442	0.426	0.419	0.418	0.469	0.449	0.444	0.544	0.466	0.464	0.477	0.451	0.459	0.547	0.541	0.471	0.37	0.239	0.281	0.248	0.187	0.238	0.297	0.314	0.286	0.39	0.35	0.362	0.374	0.329	0.374	0.391	0.365	0.363	0.207	0.125	0.22	0.212	0.115	0.114	0.072	0.171
	04:45:06	0.068	0.068	0.07	0.073	0.509	0.459	0.445	0.425	0.419	0.417	0.479	0.448	0.448	0.547	0.473	0.466	0.477	0.451	0.459	0.558	0.542	0.47	0.367	0.25	0.293	0.258	0.195	0.245	0.323	0.334	0.301	0.392	0.358	0.362	0.377	0.351	0.368	0.404	0.367	0.372	0.217	0.127	0.23	0.222	0.118	0.117	0.071	0.178
	04:50:06	0.069	0.069	0.07	0.074	0.519	0.47	0.454	0.434	0.428	0.428	0.489	0.458	0.461	0.56	0.478	0.479	0.488	0.459	0.469	0.573	0.559	0.482	0.366	0.274	0.323	0.288	0.216	0.273	0.336	0.348	0.337	0.392	0.364	0.38	0.376	0.356	0.364	0.407	0.385	0.374	0.229	0.132	0.241	0.233	0.122	0.122	0.072	0.188
	04:55:06	0.069	0.069	0.07	0.074	0.532	0.473	0.46	0.438	0.427	0.433	0.497	0.464	0.468	0.564	0.475	0.467	0.483	0.459	0.465	0.575	0.549	0.483	0.372	0.289	0.319	0.301	0.231	0.287	0.337	0.354	0.325	0.39	0.362	0.37	0.371	0.355	0.35	0.41	0.377	0.378	0.238	0.134	0.252	0.242	0.123	0.125	0.072	0.194
	05:00:06	0.069	0.068	0.07	0.074	0.546	0.492	0.469	0.445	0.44	0.441	0.502	0.469	0.479	0.583	0.493	0.488	0.507	0.475	0.482	0.602	0.576	0.503	0.385	0.319	0.353	0.328	0.261	0.323	0.38	0.379	0.37	0.397	0.367	0.38	0.387	0.361	0.354	0.424	0.385	0.395	0.25	0.14	0.267	0.256	0.128	0.13	0.072	0.203
	05:05:06	0.068	0.069	0.07	0.073	0.555	0.497	0.478	0.455	0.447	0.447	0.517	0.481	0.489	0.599	0.501	0.499	0.516	0.48	0.491	0.61	0.587	0.509	0.384	0.332	0.382	0.342	0.282	0.34	0.372	0.373	0.393	0.401	0.386	0.385	0.39	0.368	0.37	0.431	0.389	0.393	0.262	0.145	0.278	0.267	0.132	0.135	0.072	0.212
	05:10:06	0.068	0.068	0.07	0.073	0.568	0.507	0.489	0.465	0.453	0.452	0.523	0.483	0.495	0.613	0.511	0.502	0.518	0.489	0.498	0.618	0.591	0.514	0.39	0.346	0.362	0.36	0.298	0.35	0.36	0.36	0.368	0.402	0.393	0.385	0.39	0.365	0.368	0.427	0.39	0.389	0.272	0.148	0.289	0.278	0.136	0.139	0.072	0.218
	05:15:06	0.069	0.069	0.07	0.074	0.592	0.521	0.496	0.469	0.462	0.461	0.543	0.499	0.511	0.628	0.527	0.517	0.536	0.503	0.515	0.639	0.608	0.53	0.39	0.361	0.363	0.373	0.329	0.37	0.365	0.368	0.368	0.408	0.394	0.391	0.393	0.389	0.371	0.437	0.395	0.397	0.281	0.154	0.299	0.292	0.141	0.145	0.072	0.228
	05:20:06	0.068	0.069	0.07	0.074	0.602	0.531	0.504	0.479	0.467	0.468	0.55	0.501	0.518	0.64	0.534	0.527	0.549	0.514	0.526	0.654	0.62	0.537	0.392	0.363	0.365	0.367	0.346	0.366	0.369	0.369	0.37	0.413	0.394	0.396	0.402	0.393	0.374	0.446	0.401	0.401	0.29	0.159	0.308	0.303	0.144	0.151	0.072	0.235
	05:25:06	0.068	0.069	0.07	0.073	0.634	0.551	0.519	0.493	0.482	0.484	0.569	0.523	0.534	0.669	0.55	0.541	0.569	0.525	0.542	0.671	0.639	0.553	0.397	0.363	0.364	0.368	0.375	0.362	0.403	0.383	0.376	0.422	0.403	0.4	0.405	0.397	0.379	0.448	0.405	0.407	0.301	0.165	0.321	0.312	0.15	0.158	0.072	0.245
	05:30:06	0.068	0.069	0.07	0.074	0.651	0.563	0.527	0.501	0.492	0.493	0.581	0.533	0.548	0.677	0.556	0.55	0.576	0.537	0.553	0.686	0.651	0.569	0.398	0.366	0.38	0.367	0.379	0.361	0.393	0.397	0.381	0.426	0.406	0.402	0.407	0.396	0.382	0.449	0.41	0.414	0.312	0.171	0.332	0.322	0.154	0.165	0.072	0.256
	05:35:06	0.069	0.069	0.07	0.074	0.647	0.56	0.528	0.497	0.485	0.488	0.584	0.531	0.546	0.692	0.558	0.551	0.584	0.539	0.557	0.693	0.658	0.571	0.408	0.376	0.381	0.379	0.364	0.376	0.398	0.396	0.386	0.427	0.401	0.398	0.402	0.394	0.38	0.445	0.404	0.408	0.322	0.175	0.34	0.33	0.158	0.168	0.072	0.261
	05:40:06	0.068	0.069	0.07	0.074	0.672	0.58	0.548	0.511	0.498	0.5	0.6	0.545	0.563	0.711	0.576	0.567	0.599	0.554	0.574	0.711	0.676	0.589	0.407	0.377	0.386	0.382	0.366	0.365	0.401	0.391	0.394	0.438	0.413	0.405	0.41	0.402	0.385	0.456	0.413	0.414	0.334	0.182	0.351	0.342	0.162	0.175	0.072	0.271
	05:45:06	0.069	0.069	0.07	0.074	0.703	0.608	0.572	0.535	0.52	0.524	0.621	0.567	0.585	0.73	0.598	0.59	0.619	0.572	0.596	0.737	0.694	0.613	0.415	0.384	0.392	0.391	0.372	0.373	0.403	0.397	0.395	0.455	0.421	0.41	0.416	0.412	0.391	0.464	0.422	0.428	0.347	0.189	0.365	0.354	0.17	0.185	0.073	0.283
	05:50:06	0.069	0.069	0.07	0.074	0.714	0.612	0.574	0.536	0.526	0.531	0.633	0.576	0.599	0.741	0.603	0.593	0.626	0.58	0.603	0.748	0.706	0.623	0.417	0.382	0.385	0.389	0.375	0.371	0.407	0.394	0.395	0.454	0.417	0.41	0.415	0.409	0.391	0.467	0.423	0.424	0.357	0.194	0.374	0.362	0.175	0.189	0.073	0.29
	05:55:06	0.069	0.069	0.07	0.074	0.717	0.619	0.582	0.538	0.527	0.531	0.64	0.578	0.599	0.752	0.61	0.593	0.63	0.585	0.608	0.754	0.713	0.629	0.427	0.392	0.389	0.389	0.378	0.379	0.41	0.4	0.398	0.463	0.419	0.409	0.414	0.408	0.391	0.467	0.42	0.421	0.365	0.198	0.38	0.369	0.178	0.192	0.073	0.294
	06:00:06	0.069	0.068	0.07	0.073	0.764	0.664	0.627	0.579	0.562	0.566	0.676	0.616	0.641	0.777	0.651	0.64	0.671	0.62	0.65	0.783	0.747	0.667	0.44	0.41	0.394	0.396	0.391	0.387	0.41	0.402	0.409	0.489	0.432	0.428	0.424	0.425	0.402	0.479	0.441	0.437	0.38	0.207	0.395	0.382	0.186	0.201	0.073	0.305
	06:05:06	0.069	0.069	0.07	0.074	0.766	0.664	0.623	0.576	0.566	0.569	0.683	0.616	0.643	0.786	0.651	0.645	0.674	0.625	0.652	0.792	0.744	0.669	0.443	0.401	0.397	0.398	0.39	0.382	0.417	0.406	0.405	0.499	0.431	0.427	0.426	0.42	0.403	0.487	0.44	0.44	0.388	0.214	0.405	0.39	0.191	0.21	0.073	0.312
	06:10:06	0.069	0.069	0.07	0.074	0.79	0.69	0.644	0.595	0.586	0.587	0.705	0.636	0.666	0.8	0.668	0.65	0.683	0.641	0.667	0.807	0.766	0.684	0.454	0.408	0.398	0.398	0.389	0.386	0.421	0.409	0.412	0.514	0.436	0.434	0.433	0.425	0.408	0.5	0.449	0.448	0.397	0.221	0.412	0.398	0.196	0.216	0.073	0.319
	06:15:06	0.069	0.069	0.07	0.074	0.789	0.689	0.648	0.598	0.585	0.588	0.713	0.638	0.669	0.812	0.676	0.658	0.698	0.646	0.679	0.817	0.772	0.694	0.466	0.404	0.398	0.4	0.391	0.385	0.427	0.413	0.409	0.521	0.435	0.434	0.436	0.421	0.409	0.512	0.451	0.448	0.405	0.226	0.421	0.404	0.2	0.221	0.073	0.324
	06:20:06	0.07	0.07	0.071	0.074	0.826	0.718	0.675	0.62	0.61	0.612	0.739	0.664	0.698	0.823	0.697	0.674	0.712	0.669	0.697	0.838	0.793	0.714	0.48	0.411	0.4	0.403	0.395	0.39	0.431	0.418	0.418	0.537	0.443	0.442	0.439	0.428	0.413	0.521	0.459	0.46	0.415	0.233	0.429	0.413	0.206	0.23	0.073	0.334
	06:25:06	0.069	0.069	0.07	0.074	0.835	0.732	0.689	0.633	0.624	0.625	0.757	0.674	0.712	0.837	0.714	0.699	0.733	0.687	0.718	0.857	0.803	0.732	0.493	0.417	0.407	0.409	0.399	0.395	0.441	0.425	0.419	0.555	0.452	0.453	0.449	0.436	0.425	0.534	0.472	0.469	0.432	0.241	0.441	0.424	0.213	0.239	0.073	0.341
	06:30:06	0.069	0.069	0.07	0.074	0.848	0.752	0.709	0.652	0.644	0.643	0.778	0.692	0.727	0.849	0.73	0.716	0.746	0.705	0.734	0.873	0.811	0.745	0.513	0.426	0.417	0.415	0.407	0.402	0.45	0.435	0.43	0.575	0.464	0.465	0.461	0.446	0.434	0.55	0.484	0.482	0.44	0.248	0.452	0.434	0.22	0.248	0.073	0.35
	06:35:06	0.069	0.069	0.07	0.074	0.861	0.764	0.72	0.66	0.649	0.649	0.788	0.698	0.736	0.861	0.74	0.728	0.758	0.715	0.747	0.886	0.824	0.758	0.521	0.425	0.421	0.42	0.408	0.404	0.457	0.442	0.435	0.587	0.468	0.47	0.468	0.448	0.439	0.563	0.493	0.489	0.446	0.254	0.464	0.442	0.225	0.256	0.073	0.356
	06:40:06	0.069	0.069	0.07	0.074	0.881	0.784	0.747	0.687	0.676	0.676	0.814	0.727	0.757	0.871	0.761	0.744	0.771	0.738	0.763	0.907	0.835	0.774	0.544	0.441	0.432	0.43	0.415	0.414	0.467	0.453	0.449	0.607	0.476	0.486	0.479	0.458	0.448	0.583	0.512	0.506	0.451	0.261	0.471	0.453	0.231	0.265	0.074	0.364
	06:45:06	0.069	0.069	0.07	0.074	0.896	0.8	0.764	0.703	0.693	0.691	0.829	0.74	0.77	0.883	0.772	0.753	0.783	0.754	0.779	0.924	0.846	0.782	0.566	0.443	0.441	0.438	0.417	0.419	0.478	0.461	0.458	0.625	0.486	0.5	0.492	0.463	0.458	0.598	0.525	0.522	0.454	0.268	0.474	0.461	0.237	0.273	0.074	0.371
	06:50:06	0.069	0.069	0.07	0.074	0.897	0.806	0.772	0.712	0.704	0.704	0.846	0.756	0.786	0.889	0.776	0.759	0.793	0.762	0.787	0.939	0.856	0.789	0.58	0.451	0.447	0.443	0.421	0.425	0.485	0.467	0.468	0.638	0.497	0.513	0.503	0.47	0.466	0.61	0.535	0.533	0.457	0.273	0.478	0.472	0.243	0.281	0.074	0.377
	06:55:06	0.07	0.07	0.07	0.074	0.909	0.82	0.789	0.74	0.725	0.726	0.863	0.768	0.799	0.9	0.791	0.772	0.805	0.777	0.802	0.954	0.87	0.802	0.606	0.458	0.46	0.453	0.427	0.432	0.501	0.483	0.481	0.653	0.511	0.524	0.519	0.477	0.479	0.622	0.549	0.545	0.461	0.28	0.486	0.478	0.248	0.289	0.074	0.384
	07:00:06	0.07	0.069	0.07	0.074	0.925	0.827	0.792	0.736	0.729	0.724	0.863	0.772	0.803	0.908	0.795	0.779	0.805	0.778	0.804	0.963	0.875	0.808	0.618	0.466	0.464	0.459	0.435	0.439	0.508	0.493	0.492	0.664	0.52	0.534	0.533	0.487	0.492	0.632	0.559	0.556	0.461	0.285	0.486	0.48	0.251	0.296	0.074	0.389
	07:05:06	0.07	0.069	0.07	0.074	0.93	0.838	0.799	0.731	0.727	0.723	0.871	0.776	0.813	0.921	0.807	0.787	0.816	0.787	0.816	0.969	0.889	0.822	0.635	0.474	0.47	0.462	0.435	0.441	0.518	0.5	0.5	0.685	0.528	0.539	0.542	0.495	0.502	0.65	0.568	0.563	0.464	0.289	0.486	0.481	0.254	0.3	0.074	0.393
	07:10:06	0.069	0.069	0.07	0.074	0.946	0.85	0.808	0.738	0.726	0.73	0.887	0.783	0.82	0.936	0.821	0.802	0.835	0.799	0.834	0.978	0.901	0.835	0.652	0.479	0.479	0.469	0.437	0.445	0.528	0.512	0.51	0.7	0.538	0.548	0.554	0.507	0.511	0.659	0.577	0.572	0.463	0.293	0.486	0.481	0.257	0.306	0.074	0.396
	07:15:06	0.07	0.069	0.07	0.074	0.955	0.86	0.822	0.758	0.752	0.753	0.903	0.803	0.832	0.939	0.831	0.812	0.845	0.817	0.844	0.993	0.907	0.838	0.677	0.503	0.497	0.485	0.452	0.462	0.548	0.531	0.532	0.717	0.55	0.565	0.572	0.522	0.529	0.678	0.597	0.592	0.47	0.298	0.493	0.486	0.262	0.315	0.074	0.402
	07:20:06	0.07	0.069	0.07	0.074	0.942	0.875	0.83	0.765	0.762	0.76	0.917	0.808	0.841	0.946	0.838	0.819	0.854	0.822	0.852	1.004	0.911	0.851	0.687	0.509	0.502	0.493	0.455	0.469	0.559	0.545	0.547	0.732	0.56	0.575	0.583	0.528	0.535	0.69	0.61	0.6	0.473	0.303	0.493	0.486	0.265	0.32	0.074	0.405
	07:25:06	0.07	0.069	0.07	0.074	0.967	0.876	0.836	0.766	0.761	0.76	0.928	0.811	0.848	0.957	0.85	0.83	0.868	0.833	0.866	1.013	0.925	0.863	0.704	0.515	0.508	0.504	0.463	0.48	0.567	0.556	0.554	0.746	0.572	0.586	0.594	0.537	0.545	0.703	0.621	0.611	0.477	0.306	0.494	0.488	0.267	0.324	0.074	0.407
	07:30:06	0.069	0.069	0.07	0.074	0.975	0.887	0.853	0.781	0.772	0.775	0.94	0.821	0.859	0.962	0.861	0.842	0.88	0.844	0.875	1.024	0.93	0.869	0.713	0.529	0.519	0.518	0.477	0.492	0.579	0.566	0.567	0.76	0.584	0.599	0.609	0.552	0.559	0.722	0.638	0.626	0.483	0.311	0.502	0.492	0.271	0.332	0.074	0.412
	07:35:06	0.069	0.069	0.07	0.074	0.987	0.898	0.867	0.808	0.803	0.8	0.964	0.845	0.871	0.97	0.874	0.854	0.892	0.863	0.892	1.042	0.943	0.879	0.735	0.543	0.537	0.538	0.495	0.509	0.597	0.587	0.589	0.772	0.6	0.623	0.627	0.565	0.574	0.739	0.662	0.648	0.49	0.318	0.514	0.499	0.278	0.343	0.074	0.421
	07:40:06	0.071	0.071	0.071	0.075	0.992	0.905	0.877	0.83	0.819	0.817	0.971	0.857	0.88	0.973	0.881	0.863	0.898	0.873	0.899	1.057	0.949	0.886	0.75	0.568	0.562	0.56	0.522	0.53	0.626	0.612	0.614	0.778	0.617	0.645	0.649	0.581	0.597	0.751	0.677	0.659	0.501	0.327	0.524	0.509	0.287	0.356	0.075	0.433
	07:45:06	0.069	0.069	0.07	0.074	1.001	0.91	0.882	0.841	0.829	0.827	0.984	0.864	0.881	0.982	0.886	0.868	0.905	0.88	0.908	1.062	0.952	0.889	0.766	0.582	0.584	0.578	0.534	0.541	0.641	0.627	0.626	0.795	0.632	0.66	0.665	0.597	0.613	0.769	0.696	0.673	0.502	0.331	0.525	0.51	0.29	0.361	0.074	0.437
	07:50:06	0.07	0.07	0.07	0.074	1.01	0.915	0.889	0.841	0.835	0.836	0.993	0.869	0.888	0.987	0.889	0.873	0.907	0.883	0.911	1.067	0.956	0.896	0.778	0.585	0.581	0.579	0.539	0.545	0.646	0.63	0.631	0.805	0.636	0.661	0.666	0.602	0.614	0.787	0.7	0.681	0.503	0.333	0.526	0.516	0.293	0.366	0.074	0.44
	07:55:06	0.07	0.069	0.07	0.074	1.017	0.927	0.894	0.843	0.838	0.837	0.999	0.871	0.893	0.998	0.9	0.88	0.916	0.89	0.92	1.073	0.961	0.902	0.799	0.596	0.593	0.594	0.544	0.551	0.663	0.641	0.635	0.819	0.649	0.675	0.679	0.612	0.627	0.796	0.71	0.69	0.5	0.336	0.527	0.52	0.296	0.37	0.074	0.443
	08:00:06	0.069	0.069	0.07	0.074	1.03	0.934	0.907	0.861	0.855	0.853	1.016	0.89	0.906	1.002	0.908	0.89	0.928	0.903	0.936	1.083	0.977	0.914	0.81	0.614	0.606	0.609	0.562	0.57	0.677	0.66	0.659	0.832	0.663	0.691	0.698	0.629	0.645	0.817	0.728	0.708	0.509	0.34	0.533	0.526	0.301	0.378	0.074	0.449
	08:05:06	0.07	0.069	0.07	0.074	1.034	0.935	0.913	0.868	0.864	0.864	1.027	0.899	0.915	1.005	0.915	0.898	0.932	0.91	0.943	1.092	0.983	0.922	0.821	0.632	0.623	0.629	0.581	0.586	0.697	0.679	0.676	0.838	0.677	0.704	0.715	0.646	0.664	0.833	0.742	0.715	0.51	0.344	0.535	0.53	0.304	0.384	0.074	0.454
	08:10:06	0.07	0.069	0.07	0.074	1.039	0.945	0.917	0.864	0.859	0.863	1.027	0.898	0.919	1.015	0.92	0.906	0.942	0.909	0.949	1.09	0.986	0.928	0.833	0.634	0.629	0.635	0.583	0.59	0.71	0.687	0.683	0.851	0.683	0.708	0.723	0.651	0.672	0.844	0.748	0.724	0.51	0.346	0.535	0.529	0.305	0.389	0.075	0.455
	08:15:06	0.071	0.07	0.071	0.075	1.042	0.948	0.925	0.9	0.89	0.892	1.046	0.919	0.927	1.014	0.926	0.912	0.947	0.927	0.957	1.112	0.992	0.931	0.846	0.675	0.669	0.673	0.627	0.632	0.743	0.711	0.704	0.856	0.698	0.727	0.736	0.672	0.699	0.863	0.762	0.735	0.522	0.356	0.547	0.54	0.315	0.404	0.075	0.465
	08:20:06	0.07	0.069	0.07	0.074	1.05	0.953	0.93	0.892	0.884	0.887	1.044	0.915	0.927	1.021	0.932	0.914	0.954	0.929	0.964	1.113	0.997	0.937	0.858	0.67	0.667	0.67	0.622	0.627	0.745	0.718	0.712	0.868	0.708	0.732	0.746	0.681	0.703	0.874	0.77	0.745	0.521	0.356	0.544	0.541	0.315	0.405	0.074	0.462
	08:25:06	0.07	0.069	0.07	0.074	1.068	0.965	0.94	0.908	0.896	0.899	1.057	0.926	0.935	1.029	0.941	0.924	0.963	0.94	0.974	1.117	1.002	0.948	0.87	0.691	0.68	0.688	0.64	0.646	0.763	0.735	0.728	0.881	0.718	0.742	0.759	0.696	0.719	0.894	0.782	0.755	0.528	0.36	0.551	0.546	0.319	0.413	0.074	0.464
	08:30:06	0.07	0.07	0.071	0.074	1.068	0.97	0.945	0.916	0.904	0.907	1.066	0.932	0.939	1.03	0.945	0.932	0.97	0.945	0.978	1.122	1.005	0.951	0.878	0.711	0.701	0.709	0.663	0.667	0.783	0.75	0.741	0.887	0.729	0.749	0.771	0.71	0.737	0.913	0.793	0.76	0.532	0.366	0.557	0.551	0.324	0.422	0.075	0.468
	08:35:06	0.07	0.069	0.07	0.074	1.069	0.971	0.939	0.902	0.9	0.903	1.067	0.933	0.945	1.033	0.94	0.929	0.962	0.939	0.976	1.115	0.998	0.947	0.892	0.704	0.701	0.711	0.657	0.663	0.789	0.753	0.745	0.9	0.734	0.752	0.776	0.709	0.734	0.914	0.796	0.77	0.525	0.368	0.547	0.546	0.323	0.425	0.075	0.463
	08:40:06	0.07	0.069	0.07	0.074	1.083	0.974	0.954	0.926	0.918	0.921	1.086	0.946	0.954	1.036	0.955	0.941	0.977	0.958	0.993	1.127	1.017	0.962	0.902	0.731	0.722	0.732	0.688	0.69	0.816	0.775	0.76	0.906	0.746	0.767	0.787	0.729	0.756	0.935	0.807	0.773	0.533	0.371	0.555	0.551	0.326	0.433	0.075	0.466
	08:45:06	0.07	0.069	0.07	0.074	1.081	0.982	0.959	0.927	0.917	0.92	1.083	0.945	0.955	1.042	0.962	0.948	0.983	0.961	1.001	1.131	1.022	0.969	0.91	0.737	0.728	0.739	0.694	0.695	0.822	0.78	0.771	0.92	0.754	0.774	0.797	0.738	0.762	0.944	0.817	0.783	0.535	0.373	0.556	0.552	0.327	0.437	0.075	0.466
	08:50:06	0.071	0.071	0.071	0.075	1.097	0.987	0.966	0.951	0.935	0.94	1.102	0.963	0.964	1.047	0.973	0.962	0.999	0.973	1.008	1.146	1.026	0.974	0.917	0.755	0.755	0.762	0.716	0.72	0.851	0.793	0.779	0.931	0.764	0.789	0.807	0.747	0.778	0.967	0.829	0.794	0.545	0.382	0.567	0.562	0.335	0.451	0.075	0.475
	08:55:06	0.07	0.069	0.07	0.074	1.083	0.996	0.967	0.941	0.928	0.932	1.093	0.955	0.962	1.05	0.967	0.954	0.991	0.973	1.011	1.139	1.026	0.975	0.926	0.755	0.751	0.761	0.716	0.72	0.851	0.799	0.789	0.937	0.774	0.792	0.818	0.753	0.782	0.97	0.837	0.8	0.541	0.382	0.563	0.559	0.333	0.451	0.075	0.471
	09:00:06	0.07	0.069	0.07	0.074	1.092	1.001	0.979	0.954	0.942	0.946	1.107	0.966	0.972	1.055	0.98	0.964	1	0.983	1.017	1.146	1.031	0.981	0.941	0.783	0.776	0.788	0.744	0.746	0.879	0.816	0.802	0.943	0.787	0.803	0.831	0.768	0.799	0.991	0.852	0.808	0.549	0.386	0.567	0.561	0.336	0.458	0.075	0.474
	09:05:06	0.071	0.069	0.071	0.075	1.088	1.003	0.982	0.956	0.945	0.951	1.114	0.97	0.976	1.057	0.984	0.97	1.007	0.987	1.026	1.15	1.04	0.99	0.948	0.788	0.776	0.791	0.752	0.749	0.886	0.821	0.809	0.953	0.794	0.808	0.838	0.773	0.806	1	0.856	0.819	0.547	0.388	0.567	0.561	0.336	0.464	0.075	0.474
	09:10:06	0.07	0.07	0.071	0.074	1.099	1.009	0.983	0.957	0.95	0.956	1.122	0.976	0.984	1.063	0.988	0.971	1.009	0.99	1.029	1.15	1.041	0.992	0.96	0.796	0.781	0.802	0.762	0.758	0.895	0.83	0.821	0.961	0.8	0.815	0.847	0.781	0.815	1.003	0.866	0.828	0.547	0.391	0.567	0.561	0.337	0.463	0.075	0.475
	09:15:06	0.07	0.069	0.071	0.074	1.107	1.014	0.994	0.974	0.968	0.974	1.136	0.987	0.989	1.062	0.999	0.984	1.023	1	1.037	1.156	1.047	0.999	0.964	0.811	0.802	0.817	0.779	0.776	0.91	0.837	0.821	0.967	0.81	0.828	0.856	0.794	0.83	1.021	0.875	0.834	0.56	0.398	0.579	0.571	0.343	0.468	0.075	0.483
	09:20:06	0.07	0.069	0.07	0.074	1.099	1.013	0.993	0.969	0.964	0.969	1.135	0.983	0.988	1.071	1.001	0.987	1.024	1.003	1.04	1.157	1.048	1	0.972	0.814	0.806	0.822	0.789	0.788	0.925	0.847	0.828	0.974	0.817	0.834	0.862	0.8	0.836	1.027	0.879	0.839	0.559	0.402	0.578	0.571	0.344	0.467	0.075	0.485
	09:25:06	0.072	0.07	0.071	0.075	1.107	1.027	0.999	0.979	0.972	0.977	1.139	0.992	0.997	1.067	0.999	0.987	1.023	1.002	1.038	1.153	1.044	0.999	0.978	0.819	0.816	0.825	0.79	0.787	0.928	0.85	0.834	0.976	0.821	0.837	0.869	0.807	0.844	1.036	0.884	0.844	0.566	0.408	0.587	0.577	0.347	0.473	0.076	0.49
	09:30:06	0.07	0.069	0.071	0.075	1.104	1.023	0.994	0.98	0.975	0.982	1.14	0.992	0.993	1.075	1.004	0.995	1.033	1.008	1.048	1.161	1.048	1.007	0.98	0.834	0.824	0.837	0.803	0.801	0.938	0.854	0.838	0.991	0.832	0.848	0.877	0.815	0.854	1.049	0.89	0.849	0.572	0.414	0.591	0.583	0.353	0.477	0.075	0.496
	09:35:06	0.07	0.069	0.07	0.074	1.093	1.026	0.998	0.974	0.972	0.976	1.141	0.993	1	1.073	1.002	0.995	1.029	1.008	1.048	1.155	1.043	1.002	0.991	0.828	0.825	0.834	0.805	0.8	0.944	0.864	0.851	0.995	0.839	0.851	0.888	0.822	0.862	1.048	0.898	0.859	0.573	0.419	0.59	0.582	0.353	0.476	0.075	0.494
	09:40:06	0.07	0.07	0.071	0.075	1.11	1.027	1.004	0.981	0.975	0.98	1.143	0.993	0.999	1.08	1.013	1.005	1.04	1.019	1.059	1.159	1.056	1.017	1.002	0.843	0.839	0.852	0.816	0.818	0.966	0.878	0.859	1.004	0.847	0.861	0.898	0.833	0.874	1.058	0.908	0.865	0.579	0.424	0.597	0.586	0.356	0.48	0.075	0.496
	09:45:06	0.07	0.069	0.071	0.074	1.117	1.035	1.009	0.99	0.984	0.991	1.152	0.999	1	1.083	1.02	1.009	1.048	1.023	1.063	1.162	1.059	1.023	1.008	0.859	0.854	0.867	0.829	0.831	0.98	0.885	0.868	1.011	0.857	0.869	0.907	0.842	0.886	1.068	0.919	0.875	0.588	0.429	0.602	0.591	0.361	0.484	0.075	0.5
	09:50:06	0.07	0.069	0.071	0.074	1.109	1.036	1.01	0.994	0.992	1	1.161	1.006	1.01	1.085	1.023	1.01	1.046	1.03	1.066	1.165	1.061	1.024	1.013	0.864	0.859	0.872	0.837	0.84	0.99	0.892	0.875	1.015	0.865	0.874	0.912	0.85	0.893	1.074	0.924	0.882	0.592	0.433	0.604	0.593	0.364	0.486	0.075	0.503
	09:55:06	0.071	0.07	0.071	0.075	1.103	1.029	1.012	0.992	0.99	0.998	1.162	1.007	1.013	1.089	1.025	1.018	1.051	1.03	1.069	1.167	1.062	1.027	1.021	0.864	0.868	0.878	0.842	0.844	0.996	0.901	0.884	1.02	0.87	0.882	0.92	0.857	0.902	1.08	0.931	0.89	0.593	0.433	0.608	0.597	0.365	0.488	0.075	0.506
	10:00:06	0.07	0.069	0.071	0.074	1.108	1.039	1.017	0.998	0.996	1.007	1.163	1.009	1.012	1.094	1.032	1.023	1.056	1.036	1.073	1.166	1.062	1.03	1.029	0.875	0.874	0.886	0.852	0.856	1.009	0.905	0.888	1.025	0.876	0.889	0.926	0.864	0.909	1.088	0.937	0.894	0.601	0.434	0.612	0.599	0.369	0.493	0.075	0.509
	10:05:06	0.071	0.07	0.071	0.075	1.113	1.046	1.02	0.997	0.994	1.001	1.167	1.008	1.017	1.105	1.033	1.027	1.056	1.035	1.078	1.167	1.062	1.032	1.04	0.875	0.878	0.898	0.858	0.86	1.017	0.919	0.901	1.037	0.884	0.894	0.939	0.875	0.919	1.088	0.948	0.903	0.601	0.434	0.618	0.604	0.371	0.495	0.075	0.511
	10:10:06	0.07	0.07	0.071	0.075	1.113	1.049	1.027	1.007	1.006	1.012	1.173	1.014	1.021	1.101	1.042	1.034	1.067	1.046	1.082	1.162	1.064	1.041	1.046	0.89	0.887	0.904	0.871	0.87	1.028	0.922	0.906	1.039	0.893	0.902	0.942	0.88	0.928	1.098	0.953	0.911	0.611	0.437	0.622	0.61	0.375	0.501	0.076	0.515
	10:15:06	0.07	0.069	0.071	0.074	1.104	1.052	1.024	1.005	1.004	1.01	1.172	1.011	1.017	1.099	1.043	1.035	1.067	1.05	1.085	1.16	1.067	1.044	1.052	0.899	0.891	0.909	0.878	0.879	1.038	0.926	0.91	1.041	0.898	0.905	0.947	0.885	0.933	1.104	0.957	0.915	0.612	0.439	0.624	0.611	0.378	0.504	0.075	0.518
	10:20:06	0.07	0.069	0.071	0.074	1.101	1.045	1.021	1.008	1.004	1.013	1.169	1.009	1.013	1.099	1.046	1.037	1.071	1.053	1.084	1.158	1.064	1.045	1.047	0.902	0.896	0.912	0.884	0.887	1.044	0.926	0.913	1.047	0.901	0.912	0.951	0.888	0.939	1.114	0.959	0.911	0.623	0.443	0.63	0.614	0.383	0.511	0.075	0.525
	10:25:06	0.071	0.07	0.071	0.075	1.095	1.039	1.02	1.007	1.006	1.014	1.163	1.007	1.014	1.101	1.045	1.035	1.069	1.052	1.087	1.157	1.064	1.046	1.049	0.904	0.898	0.915	0.886	0.888	1.043	0.926	0.914	1.041	0.906	0.914	0.958	0.897	0.944	1.119	0.962	0.919	0.629	0.446	0.636	0.617	0.389	0.516	0.076	0.529
	10:30:06	0.071	0.07	0.071	0.074	1.095	1.041	1.019	1.008	1.007	1.016	1.165	1.008	1.016	1.1	1.046	1.037	1.07	1.057	1.09	1.152	1.064	1.046	1.054	0.905	0.904	0.919	0.892	0.891	1.051	0.936	0.922	1.043	0.912	0.916	0.961	0.903	0.95	1.121	0.966	0.926	0.63	0.449	0.64	0.623	0.393	0.518	0.076	0.53
	10:35:06	0.07	0.069	0.071	0.074	1.09	1.043	1.018	1.004	1.008	1.016	1.169	1.011	1.018	1.098	1.045	1.034	1.07	1.054	1.091	1.145	1.059	1.042	1.071	0.91	0.907	0.921	0.896	0.893	1.054	0.939	0.926	1.047	0.915	0.918	0.965	0.907	0.956	1.124	0.971	0.931	0.629	0.449	0.639	0.625	0.395	0.519	0.076	0.531
	10:40:06	0.071	0.07	0.071	0.075	1.099	1.046	1.021	1.01	1.01	1.017	1.166	1.007	1.015	1.095	1.047	1.038	1.074	1.058	1.1	1.143	1.065	1.053	1.066	0.92	0.921	0.933	0.907	0.909	1.07	0.943	0.931	1.053	0.922	0.928	0.976	0.915	0.966	1.133	0.979	0.934	0.64	0.453	0.647	0.63	0.399	0.525	0.076	0.536
	10:45:06	0.071	0.07	0.071	0.075	1.093	1.044	1.027	1.013	1.015	1.023	1.174	1.013	1.023	1.101	1.052	1.043	1.076	1.063	1.098	1.139	1.064	1.05	1.077	0.923	0.924	0.937	0.913	0.911	1.073	0.951	0.942	1.057	0.93	0.935	0.982	0.924	0.974	1.135	0.983	0.945	0.639	0.455	0.65	0.632	0.403	0.527	0.076	0.536
	10:50:06	0.07	0.07	0.071	0.075	1.097	1.051	1.035	1.014	1.017	1.025	1.176	1.016	1.027	1.108	1.059	1.047	1.082	1.065	1.103	1.134	1.068	1.053	1.089	0.93	0.933	0.948	0.924	0.922	1.086	0.965	0.951	1.068	0.935	0.943	0.99	0.93	0.985	1.135	0.992	0.952	0.645	0.457	0.653	0.637	0.404	0.529	0.076	0.537
	10:55:06	0.072	0.071	0.072	0.075	1.087	1.047	1.035	1.022	1.027	1.031	1.178	1.02	1.027	1.094	1.057	1.052	1.081	1.063	1.097	1.11	1.057	1.049	1.09	0.943	0.936	0.954	0.927	0.927	1.089	0.958	0.948	1.064	0.938	0.949	0.995	0.934	0.988	1.129	0.99	0.951	0.66	0.462	0.666	0.646	0.407	0.536	0.077	0.544
	11:00:06	0.07	0.07	0.071	0.075	1.093	1.052	1.03	1.019	1.019	1.033	1.174	1.011	1.022	1.093	1.058	1.052	1.086	1.071	1.103	1.107	1.065	1.054	1.096	0.945	0.944	0.959	0.935	0.939	1.102	0.966	0.955	1.065	0.943	0.954	1	0.938	0.993	1.139	0.997	0.956	0.655	0.464	0.663	0.646	0.406	0.538	0.076	0.545
	11:05:06	0.07	0.07	0.071	0.075	1.099	1.055	1.027	1.016	1.02	1.03	1.17	1.008	1.02	1.09	1.056	1.049	1.08	1.067	1.108	1.1	1.063	1.056	1.091	0.948	0.943	0.96	0.938	0.939	1.101	0.969	0.956	1.067	0.95	0.956	1.002	0.944	0.997	1.142	1.001	0.957	0.663	0.468	0.671	0.652	0.407	0.542	0.076	0.548
	11:10:06	0.071	0.07	0.071	0.074	1.095	1.047	1.03	1.015	1.022	1.031	1.17	1.007	1.022	1.091	1.059	1.049	1.083	1.069	1.107	1.089	1.061	1.056	1.096	0.953	0.951	0.965	0.942	0.943	1.107	0.971	0.962	1.074	0.954	0.961	1.005	0.947	1.003	1.142	1.002	0.964	0.665	0.471	0.674	0.656	0.409	0.545	0.076	0.552
	11:15:06	0.07	0.07	0.071	0.075	1.089	1.043	1.023	1.016	1.021	1.031	1.167	1.004	1.017	1.08	1.054	1.046	1.078	1.06	1.096	1.068	1.044	1.044	1.098	0.957	0.955	0.969	0.944	0.949	1.111	0.971	0.962	1.067	0.956	0.96	1.005	0.948	1.001	1.142	1	0.963	0.671	0.476	0.681	0.665	0.411	0.549	0.076	0.555
	11:20:06	0.071	0.07	0.071	0.075	1.096	1.046	1.026	1.017	1.021	1.029	1.166	1.006	1.018	1.087	1.055	1.046	1.082	1.065	1.101	1.056	1.057	1.051	1.092	0.961	0.956	0.969	0.946	0.95	1.115	0.974	0.965	1.071	0.958	0.966	1.012	0.955	1.01	1.145	1.007	0.97	0.674	0.48	0.682	0.664	0.413	0.551	0.076	0.558
	11:25:06	0.07	0.07	0.071	0.074	1.094	1.047	1.024	1.016	1.023	1.033	1.171	1.011	1.023	1.09	1.058	1.048	1.082	1.066	1.099	1.047	1.052	1.047	1.094	0.956	0.961	0.971	0.95	0.953	1.117	0.978	0.97	1.071	0.963	0.965	1.013	0.959	1.014	1.146	1.006	0.976	0.667	0.482	0.679	0.664	0.413	0.551	0.077	0.559
	11:30:06	0.071	0.07	0.071	0.075	1.089	1.05	1.033	1.022	1.025	1.038	1.17	1.011	1.023	1.091	1.057	1.048	1.082	1.065	1.101	1.033	1.054	1.051	1.105	0.973	0.967	0.978	0.958	0.961	1.124	0.982	0.978	1.078	0.965	0.975	1.018	0.963	1.021	1.147	1.011	0.978	0.675	0.485	0.689	0.67	0.415	0.556	0.077	0.562
	11:35:06	0.071	0.07	0.071	0.075	1.092	1.045	1.033	1.025	1.03	1.04	1.169	1.016	1.024	1.089	1.057	1.05	1.08	1.067	1.102	1.018	1.052	1.053	1.104	0.979	0.968	0.982	0.962	0.968	1.125	0.983	0.978	1.076	0.968	0.978	1.022	0.968	1.024	1.148	1.012	0.981	0.684	0.49	0.694	0.675	0.419	0.56	0.077	0.567
	11:40:06	0.071	0.07	0.071	0.075	1.094	1.05	1.032	1.023	1.031	1.042	1.175	1.017	1.028	1.095	1.063	1.051	1.085	1.072	1.105	1.012	1.056	1.053	1.105	0.976	0.972	0.986	0.966	0.971	1.129	0.99	0.983	1.081	0.972	0.982	1.028	0.975	1.032	1.15	1.015	0.986	0.68	0.49	0.691	0.676	0.42	0.56	0.077	0.567
	11:45:06	0.071	0.07	0.071	0.075	1.097	1.055	1.03	1.023	1.03	1.04	1.171	1.016	1.027	1.097	1.062	1.053	1.089	1.069	1.106	1.004	1.057	1.055	1.107	0.981	0.977	0.991	0.971	0.977	1.137	0.993	0.988	1.09	0.979	0.989	1.035	0.98	1.04	1.149	1.021	0.989	0.683	0.493	0.696	0.679	0.422	0.563	0.077	0.569
	11:50:06	0.071	0.07	0.071	0.075	1.098	1.055	1.037	1.026	1.033	1.044	1.174	1.023	1.034	1.096	1.066	1.054	1.092	1.071	1.104	1	1.055	1.053	1.116	0.986	0.983	0.994	0.976	0.982	1.139	0.995	0.99	1.095	0.983	0.995	1.041	0.988	1.044	1.15	1.023	0.998	0.679	0.495	0.692	0.678	0.422	0.564	0.077	0.567
	11:55:06	0.073	0.072	0.071	0.076	1.11	1.057	1.044	1.038	1.043	1.055	1.178	1.029	1.041	1.101	1.068	1.062	1.09	1.074	1.107	0.991	1.059	1.059	1.109	0.994	0.992	1	0.983	0.992	1.144	0.997	0.995	1.097	0.992	1.005	1.049	0.993	1.052	1.151	1.025	0.999	0.698	0.5	0.708	0.692	0.428	0.571	0.078	0.576
	12:00:06	0.075	0.074	0.072	0.077	1.103	1.057	1.038	1.028	1.031	1.041	1.173	1.022	1.033	1.1	1.068	1.057	1.095	1.07	1.102	0.984	1.05	1.049	1.11	0.985	0.985	0.996	0.984	0.988	1.141	0.996	0.997	1.1	0.99	1.005	1.049	0.997	1.052	1.141	1.025	1.002	0.69	0.5	0.702	0.688	0.428	0.571	0.079	0.574
[truncated: 136 more columns]

## Sheet: dLTGRep2
	Media	LB	LB+IPTG	LB0N	LB0N+IPTG	LB	LB	LB	LB	LB	LB	LB	LB	LB	LB+IPTG	LB+IPTG	LB+IPTG	LB+IPTG	LB+IPTG	LB+IPTG	LB+IPTG	LB+IPTG	LB+IPTG	LB	LB	LB	LB	LB	LB	LB	LB	LB	LB+IPTG	LB+IPTG	LB+IPTG	LB+IPTG	LB+IPTG	LB+IPTG	LB+IPTG	LB+IPTG	LB+IPTG	LB0N	LB0N	LB0N	LB0N	LB0N	LB0N	LB0N	LB0N
	Dilution Factor	Blank	Blank	Blank	Blank	0.001	0.001	0.001	0.001	0.001	0.001	0.001	0.001	0.001	0.001	0.001	0.001	0.001	0.001	0.001	0.001	0.001	0.001	1e-05	1e-05	1e-05	1e-05	1e-05	1e-05	1e-05	1e-05	1e-05	1e-05	1e-05	1e-05	1e-05	1e-05	1e-05	1e-05	1e-05	1e-05	0.001	0.001	0.001	0.001	0.001	0.001	0.001	0.001
	Background	N/A	N/A	N/A	N/A	WT	d6 LTG	d6 LTG	d6 LTG	d6 LTG	d6 LTG	d6 LTG	d6 LTG	d6 LTG	WT	d6 LTG	d6 LTG	d6 LTG	d6 LTG	d6 LTG	d6 LTG	d6 LTG	d6 LTG	WT	d6 LTG	d6 LTG	d6 LTG	d6 LTG	d6 LTG	d6 LTG	d6 LTG	d6 LTG	WT	d6 LTG	d6 LTG	d6 LTG	d6 LTG	d6 LTG	d6 LTG	d6 LTG	d6 LTG	WT	d6 LTG	d6 LTG	d6 LTG	d6 LTG	d6 LTG	d6 LTG	d6 LTG
	Ptac	N/A	N/A	N/A	N/A	empty	empty	mltA	mltB	mltC	mltD	mltF	slt70	EcmltE	empty	empty	mltA	mltB	mltC	mltD	mltF	slt70	EcmltE	empty	empty	mltA	mltB	mltC	mltD	mltF	slt70	EcmltE	empty	empty	mltA	mltB	mltC	mltD	mltF	slt70	EcmltE	empty	empty	mltA	mltB	mltC	mltD	mltF	slt70
	hr:min:sec
	00:01:05	0.07	0.068	0.069	0.071	0.085	0.072	0.071	0.07	0.068	0.069	0.073	0.072	0.072	0.07	0.069	0.068	0.067	0.066	0.067	0.07	0.07	0.07	0.07	0.07	0.067	0.067	0.066	0.066	0.066	0.068	0.069	0.069	0.068	0.067	0.066	0.066	0.066	0.067	0.068	0.069	0.073	0.069	0.067	0.067	0.067	0.067	0.066	0.067
	00:05:06	0.068	0.067	0.068	0.071	0.084	0.071	0.07	0.069	0.067	0.069	0.072	0.07	0.07	0.069	0.068	0.067	0.066	0.066	0.066	0.069	0.069	0.069	0.069	0.069	0.066	0.067	0.066	0.065	0.066	0.067	0.068	0.068	0.067	0.066	0.065	0.065	0.066	0.066	0.067	0.068	0.072	0.068	0.066	0.067	0.067	0.067	0.066	0.067
	00:10:06	0.067	0.066	0.067	0.07	0.084	0.071	0.07	0.069	0.067	0.068	0.071	0.07	0.069	0.068	0.068	0.067	0.066	0.065	0.066	0.069	0.068	0.068	0.069	0.068	0.066	0.066	0.065	0.065	0.065	0.066	0.067	0.068	0.067	0.066	0.065	0.065	0.066	0.066	0.067	0.067	0.072	0.068	0.066	0.066	0.067	0.067	0.065	0.066
	00:15:06	0.067	0.066	0.067	0.07	0.084	0.071	0.07	0.069	0.067	0.068	0.072	0.069	0.069	0.068	0.068	0.067	0.066	0.065	0.066	0.069	0.068	0.068	0.069	0.067	0.065	0.066	0.065	0.064	0.065	0.066	0.067	0.068	0.067	0.066	0.064	0.065	0.066	0.066	0.067	0.067	0.071	0.067	0.066	0.066	0.066	0.066	0.065	0.066
	00:20:06	0.067	0.067	0.067	0.071	0.085	0.072	0.07	0.069	0.067	0.069	0.073	0.07	0.069	0.069	0.068	0.067	0.067	0.065	0.066	0.07	0.069	0.068	0.069	0.067	0.065	0.066	0.065	0.065	0.065	0.066	0.067	0.068	0.067	0.066	0.065	0.065	0.066	0.066	0.067	0.067	0.072	0.067	0.066	0.066	0.067	0.067	0.065	0.066
	00:25:06	0.067	0.067	0.067	0.071	0.085	0.072	0.071	0.069	0.067	0.069	0.074	0.07	0.069	0.069	0.068	0.067	0.067	0.065	0.067	0.071	0.07	0.068	0.069	0.067	0.065	0.066	0.065	0.064	0.064	0.066	0.067	0.068	0.067	0.066	0.065	0.065	0.065	0.066	0.067	0.067	0.072	0.067	0.066	0.066	0.067	0.067	0.065	0.066
	00:30:06	0.068	0.067	0.068	0.071	0.086	0.072	0.071	0.07	0.068	0.07	0.076	0.071	0.07	0.07	0.069	0.068	0.068	0.066	0.067	0.073	0.071	0.069	0.07	0.067	0.066	0.066	0.065	0.065	0.065	0.066	0.067	0.068	0.067	0.066	0.065	0.065	0.066	0.066	0.067	0.067	0.073	0.068	0.066	0.066	0.067	0.067	0.065	0.066
	00:35:06	0.068	0.067	0.068	0.071	0.086	0.073	0.072	0.071	0.068	0.07	0.077	0.072	0.071	0.071	0.069	0.068	0.068	0.066	0.068	0.074	0.072	0.07	0.07	0.067	0.065	0.066	0.065	0.065	0.065	0.066	0.067	0.068	0.067	0.066	0.065	0.065	0.066	0.067	0.067	0.067	0.073	0.068	0.066	0.066	0.067	0.067	0.065	0.066
	00:40:06	0.068	0.067	0.068	0.071	0.087	0.074	0.073	0.071	0.069	0.071	0.079	0.073	0.071	0.072	0.07	0.069	0.069	0.066	0.069	0.076	0.073	0.07	0.07	0.068	0.066	0.066	0.065	0.065	0.065	0.066	0.067	0.069	0.067	0.066	0.065	0.065	0.066	0.066	0.067	0.067	0.073	0.068	0.067	0.066	0.067	0.067	0.065	0.066
	00:45:06	0.068	0.067	0.068	0.072	0.088	0.074	0.073	0.072	0.069	0.072	0.082	0.074	0.073	0.073	0.071	0.07	0.07	0.067	0.07	0.078	0.074	0.071	0.07	0.067	0.066	0.066	0.065	0.065	0.065	0.066	0.067	0.068	0.067	0.066	0.065	0.065	0.066	0.066	0.067	0.067	0.073	0.068	0.067	0.067	0.067	0.067	0.065	0.067
	00:50:06	0.068	0.068	0.068	0.072	0.09	0.075	0.075	0.073	0.07	0.073	0.085	0.075	0.074	0.075	0.071	0.07	0.071	0.067	0.071	0.081	0.075	0.072	0.07	0.068	0.066	0.066	0.065	0.065	0.065	0.066	0.067	0.069	0.067	0.066	0.065	0.065	0.066	0.066	0.067	0.067	0.073	0.068	0.067	0.067	0.067	0.067	0.066	0.067
	00:55:05	0.068	0.068	0.068	0.072	0.091	0.076	0.076	0.074	0.071	0.074	0.088	0.076	0.074	0.076	0.072	0.072	0.072	0.068	0.072	0.085	0.078	0.074	0.07	0.068	0.066	0.067	0.065	0.065	0.065	0.066	0.067	0.069	0.067	0.066	0.065	0.065	0.066	0.066	0.067	0.067	0.073	0.068	0.067	0.067	0.067	0.067	0.066	0.067
	01:00:06	0.068	0.068	0.068	0.072	0.093	0.077	0.077	0.076	0.072	0.076	0.093	0.078	0.076	0.078	0.073	0.073	0.073	0.068	0.074	0.089	0.08	0.075	0.07	0.068	0.066	0.066	0.065	0.065	0.065	0.066	0.067	0.069	0.067	0.066	0.065	0.065	0.066	0.066	0.067	0.067	0.073	0.068	0.067	0.067	0.067	0.067	0.066	0.067
	01:05:06	0.071	0.07	0.07	0.074	0.096	0.081	0.081	0.079	0.075	0.079	0.101	0.082	0.08	0.082	0.076	0.076	0.077	0.07	0.077	0.096	0.085	0.079	0.073	0.07	0.067	0.068	0.067	0.067	0.066	0.068	0.069	0.07	0.069	0.067	0.066	0.066	0.067	0.067	0.068	0.068	0.076	0.07	0.069	0.069	0.069	0.069	0.067	0.069
	01:10:06	0.07	0.069	0.069	0.073	0.098	0.082	0.082	0.081	0.076	0.081	0.106	0.084	0.081	0.085	0.078	0.078	0.079	0.071	0.08	0.101	0.087	0.08	0.073	0.069	0.067	0.068	0.066	0.066	0.066	0.067	0.069	0.07	0.068	0.067	0.065	0.066	0.066	0.066	0.068	0.068	0.076	0.069	0.068	0.069	0.068	0.068	0.066	0.068
	01:15:06	0.069	0.068	0.068	0.072	0.101	0.083	0.085	0.083	0.077	0.083	0.113	0.086	0.083	0.087	0.079	0.08	0.081	0.072	0.082	0.109	0.091	0.082	0.071	0.068	0.066	0.067	0.066	0.065	0.065	0.067	0.068	0.069	0.067	0.066	0.065	0.065	0.066	0.066	0.067	0.067	0.075	0.069	0.068	0.068	0.068	0.067	0.066	0.068
	01:20:06	0.069	0.068	0.068	0.072	0.104	0.085	0.088	0.087	0.079	0.086	0.124	0.09	0.085	0.092	0.082	0.082	0.084	0.073	0.086	0.12	0.096	0.085	0.071	0.068	0.066	0.067	0.065	0.065	0.065	0.067	0.068	0.069	0.068	0.066	0.065	0.065	0.066	0.066	0.067	0.067	0.075	0.069	0.068	0.068	0.068	0.068	0.066	0.068
	01:25:06	0.07	0.069	0.069	0.073	0.11	0.089	0.092	0.092	0.082	0.092	0.138	0.095	0.091	0.098	0.086	0.087	0.09	0.075	0.091	0.132	0.103	0.09	0.072	0.069	0.067	0.067	0.066	0.066	0.066	0.067	0.068	0.07	0.068	0.067	0.065	0.065	0.066	0.066	0.068	0.067	0.076	0.07	0.069	0.069	0.068	0.068	0.066	0.069
	01:30:06	0.069	0.068	0.069	0.072	0.115	0.093	0.096	0.096	0.084	0.095	0.156	0.101	0.095	0.104	0.089	0.091	0.094	0.077	0.097	0.149	0.111	0.095	0.071	0.068	0.066	0.067	0.066	0.065	0.065	0.067	0.068	0.069	0.068	0.066	0.065	0.065	0.066	0.066	0.067	0.067	0.075	0.07	0.069	0.069	0.068	0.068	0.066	0.069
	01:35:06	0.069	0.068	0.068	0.072	0.123	0.098	0.103	0.103	0.089	0.102	0.174	0.109	0.101	0.113	0.094	0.097	0.102	0.08	0.104	0.167	0.122	0.101	0.071	0.068	0.067	0.067	0.066	0.065	0.066	0.067	0.068	0.069	0.068	0.067	0.065	0.065	0.066	0.066	0.068	0.067	0.076	0.07	0.069	0.07	0.069	0.068	0.066	0.069
	01:40:06	0.07	0.069	0.069	0.072	0.132	0.104	0.111	0.111	0.094	0.11	0.195	0.118	0.108	0.124	0.1	0.104	0.111	0.084	0.113	0.191	0.135	0.109	0.071	0.069	0.067	0.067	0.066	0.066	0.066	0.067	0.069	0.07	0.068	0.067	0.065	0.066	0.066	0.067	0.068	0.068	0.076	0.07	0.07	0.07	0.069	0.069	0.067	0.07
	01:45:06	0.069	0.068	0.069	0.072	0.144	0.111	0.12	0.122	0.099	0.121	0.219	0.13	0.118	0.137	0.108	0.112	0.122	0.088	0.126	0.213	0.152	0.119	0.071	0.069	0.067	0.067	0.066	0.066	0.066	0.067	0.069	0.07	0.068	0.067	0.065	0.066	0.066	0.067	0.068	0.068	0.077	0.071	0.07	0.071	0.069	0.069	0.067	0.07
	01:50:06	0.069	0.069	0.069	0.072	0.159	0.121	0.134	0.137	0.108	0.134	0.233	0.145	0.131	0.154	0.118	0.124	0.137	0.093	0.14	0.225	0.171	0.133	0.071	0.069	0.067	0.068	0.066	0.066	0.066	0.067	0.069	0.07	0.068	0.067	0.066	0.066	0.066	0.067	0.068	0.068	0.078	0.071	0.071	0.072	0.07	0.069	0.067	0.071
	01:55:06	0.069	0.069	0.069	0.072	0.176	0.134	0.149	0.153	0.117	0.15	0.25	0.162	0.147	0.17	0.131	0.139	0.155	0.1	0.159	0.239	0.191	0.148	0.072	0.069	0.067	0.068	0.066	0.066	0.066	0.067	0.069	0.07	0.068	0.067	0.066	0.066	0.066	0.067	0.068	0.068	0.078	0.071	0.071	0.072	0.07	0.07	0.067	0.071
	02:00:06	0.071	0.07	0.07	0.074	0.191	0.149	0.167	0.17	0.13	0.167	0.277	0.179	0.164	0.193	0.146	0.157	0.173	0.109	0.176	0.27	0.204	0.164	0.072	0.07	0.068	0.068	0.067	0.067	0.067	0.068	0.07	0.071	0.069	0.067	0.066	0.066	0.067	0.067	0.069	0.068	0.08	0.072	0.072	0.073	0.07	0.07	0.068	0.072
	02:05:06	0.072	0.071	0.071	0.075	0.215	0.167	0.186	0.192	0.147	0.186	0.299	0.197	0.18	0.205	0.161	0.173	0.195	0.12	0.196	0.31	0.234	0.186	0.074	0.072	0.069	0.069	0.068	0.068	0.068	0.07	0.071	0.072	0.07	0.068	0.067	0.067	0.068	0.068	0.07	0.069	0.082	0.074	0.074	0.075	0.072	0.071	0.068	0.074
	02:10:06	0.07	0.07	0.069	0.073	0.235	0.183	0.215	0.217	0.162	0.21	0.318	0.222	0.207	0.229	0.179	0.198	0.215	0.133	0.211	0.321	0.253	0.201	0.072	0.07	0.068	0.069	0.067	0.067	0.068	0.069	0.07	0.071	0.069	0.068	0.066	0.066	0.067	0.068	0.069	0.069	0.082	0.073	0.074	0.075	0.071	0.071	0.067	0.074
	02:15:06	0.071	0.07	0.07	0.074	0.256	0.208	0.223	0.227	0.177	0.219	0.33	0.236	0.217	0.247	0.192	0.208	0.224	0.148	0.228	0.336	0.271	0.221	0.074	0.07	0.068	0.069	0.067	0.068	0.069	0.07	0.071	0.072	0.069	0.068	0.067	0.066	0.067	0.068	0.069	0.069	0.083	0.074	0.075	0.076	0.072	0.072	0.067	0.075
	02:20:06	0.069	0.069	0.069	0.072	0.277	0.228	0.241	0.243	0.198	0.238	0.335	0.252	0.233	0.263	0.21	0.217	0.235	0.162	0.24	0.341	0.285	0.239	0.073	0.07	0.068	0.069	0.067	0.067	0.069	0.069	0.07	0.072	0.069	0.068	0.067	0.066	0.068	0.069	0.07	0.069	0.084	0.074	0.076	0.078	0.072	0.072	0.067	0.076
	02:25:06	0.07	0.069	0.069	0.072	0.303	0.245	0.26	0.264	0.213	0.255	0.358	0.273	0.256	0.284	0.231	0.24	0.259	0.184	0.266	0.369	0.304	0.261	0.074	0.071	0.069	0.07	0.068	0.068	0.07	0.07	0.071	0.073	0.07	0.069	0.067	0.067	0.068	0.07	0.07	0.07	0.085	0.075	0.077	0.079	0.073	0.073	0.068	0.077
	02:30:06	0.07	0.069	0.069	0.072	0.317	0.276	0.28	0.28	0.235	0.271	0.351	0.29	0.274	0.303	0.252	0.256	0.278	0.195	0.277	0.358	0.318	0.28	0.075	0.071	0.069	0.07	0.068	0.068	0.07	0.07	0.071	0.073	0.07	0.069	0.068	0.067	0.069	0.07	0.071	0.07	0.086	0.076	0.079	0.081	0.073	0.074	0.068	0.079
	02:35:06	0.072	0.07	0.07	0.074	0.313	0.288	0.305	0.31	0.26	0.301	0.362	0.321	0.312	0.326	0.282	0.293	0.309	0.216	0.31	0.375	0.359	0.317	0.077	0.073	0.071	0.071	0.069	0.07	0.073	0.072	0.073	0.075	0.072	0.07	0.069	0.068	0.07	0.072	0.072	0.072	0.089	0.077	0.081	0.084	0.075	0.075	0.068	0.081
	02:40:06	0.07	0.069	0.07	0.073	0.346	0.313	0.313	0.312	0.277	0.304	0.366	0.318	0.307	0.333	0.285	0.296	0.312	0.229	0.308	0.368	0.338	0.311	0.077	0.072	0.071	0.071	0.069	0.07	0.073	0.072	0.073	0.076	0.072	0.071	0.069	0.068	0.07	0.073	0.072	0.072	0.09	0.077	0.083	0.085	0.075	0.075	0.068	0.082
	02:45:06	0.07	0.069	0.069	0.072	0.37	0.334	0.337	0.341	0.299	0.329	0.379	0.36	0.34	0.353	0.318	0.329	0.344	0.259	0.347	0.39	0.345	0.349	0.079	0.073	0.072	0.072	0.07	0.071	0.075	0.073	0.074	0.077	0.072	0.071	0.07	0.069	0.071	0.074	0.074	0.073	0.093	0.079	0.085	0.088	0.075	0.076	0.068	0.084
	02:50:06	0.071	0.07	0.07	0.074	0.372	0.353	0.366	0.354	0.318	0.356	0.389	0.35	0.373	0.348	0.337	0.347	0.353	0.277	0.342	0.425	0.347	0.382	0.081	0.075	0.073	0.074	0.071	0.073	0.078	0.075	0.076	0.079	0.074	0.073	0.071	0.07	0.072	0.076	0.075	0.074	0.096	0.08	0.087	0.091	0.077	0.077	0.068	0.087
	02:55:06	0.071	0.07	0.07	0.074	0.365	0.358	0.352	0.341	0.334	0.336	0.388	0.34	0.353	0.34	0.358	0.357	0.345	0.304	0.337	0.41	0.349	0.351	0.084	0.076	0.075	0.075	0.072	0.074	0.08	0.076	0.077	0.082	0.075	0.074	0.072	0.071	0.073	0.079	0.077	0.076	0.1	0.081	0.091	0.095	0.078	0.079	0.069	0.09
	03:00:06	0.071	0.07	0.07	0.074	0.366	0.363	0.347	0.339	0.348	0.339	0.391	0.344	0.347	0.346	0.336	0.338	0.341	0.309	0.332	0.409	0.407	0.342	0.086	0.078	0.076	0.077	0.073	0.076	0.083	0.078	0.079	0.084	0.076	0.076	0.074	0.072	0.075	0.081	0.079	0.077	0.103	0.082	0.094	0.099	0.079	0.08	0.069	0.092
	03:05:06	0.07	0.069	0.069	0.072	0.377	0.356	0.353	0.349	0.344	0.346	0.402	0.354	0.351	0.374	0.333	0.345	0.35	0.319	0.341	0.416	0.366	0.344	0.09	0.08	0.078	0.079	0.075	0.078	0.088	0.08	0.081	0.087	0.078	0.078	0.076	0.073	0.077	0.085	0.081	0.079	0.106	0.083	0.098	0.103	0.08	0.081	0.069	0.095
	03:10:06	0.07	0.069	0.069	0.072	0.394	0.359	0.355	0.359	0.343	0.354	0.403	0.397	0.359	0.363	0.34	0.345	0.361	0.358	0.375	0.419	0.369	0.372	0.094	0.082	0.08	0.081	0.076	0.08	0.092	0.082	0.083	0.091	0.08	0.08	0.078	0.075	0.079	0.089	0.084	0.082	0.111	0.084	0.101	0.108	0.081	0.083	0.069	0.099
	03:15:06	0.07	0.07	0.069	0.072	0.381	0.366	0.38	0.372	0.349	0.36	0.412	0.371	0.381	0.371	0.355	0.362	0.375	0.344	0.36	0.431	0.373	0.38	0.1	0.084	0.083	0.084	0.078	0.083	0.099	0.086	0.087	0.096	0.082	0.083	0.08	0.077	0.081	0.094	0.088	0.085	0.116	0.085	0.106	0.113	0.082	0.084	0.069	0.103
	03:20:06	0.07	0.069	0.069	0.072	0.402	0.385	0.375	0.374	0.354	0.363	0.416	0.372	0.374	0.366	0.358	0.364	0.376	0.331	0.359	0.422	0.37	0.37	0.107	0.088	0.087	0.088	0.081	0.087	0.107	0.091	0.092	0.102	0.086	0.087	0.084	0.079	0.086	0.101	0.093	0.09	0.121	0.087	0.112	0.12	0.083	0.086	0.069	0.107
	03:25:06	0.07	0.069	0.069	0.072	0.394	0.376	0.377	0.377	0.372	0.363	0.412	0.373	0.373	0.366	0.36	0.371	0.379	0.338	0.365	0.432	0.373	0.366	0.116	0.093	0.092	0.093	0.084	0.092	0.117	0.097	0.097	0.11	0.09	0.091	0.088	0.082	0.09	0.11	0.099	0.095	0.128	0.089	0.118	0.127	0.085	0.088	0.069	0.112
	03:30:06	0.07	0.069	0.07	0.072	0.385	0.382	0.376	0.376	0.368	0.363	0.425	0.378	0.381	0.374	0.368	0.37	0.379	0.364	0.366	0.448	0.38	0.379	0.127	0.098	0.098	0.099	0.088	0.099	0.129	0.103	0.103	0.12	0.095	0.097	0.094	0.086	0.096	0.119	0.105	0.101	0.136	0.09	0.124	0.134	0.086	0.089	0.069	0.118
	03:35:06	0.072	0.07	0.07	0.074	0.401	0.379	0.387	0.385	0.38	0.379	0.432	0.385	0.391	0.382	0.379	0.378	0.387	0.366	0.377	0.455	0.391	0.386	0.143	0.105	0.106	0.107	0.093	0.107	0.144	0.112	0.112	0.135	0.101	0.105	0.101	0.09	0.104	0.133	0.115	0.108	0.146	0.093	0.133	0.143	0.088	0.092	0.07	0.123
	03:40:06	0.072	0.07	0.07	0.074	0.398	0.381	0.384	0.381	0.379	0.37	0.433	0.383	0.386	0.38	0.371	0.382	0.387	0.363	0.379	0.463	0.386	0.381	0.159	0.113	0.116	0.117	0.1	0.117	0.158	0.123	0.123	0.15	0.109	0.114	0.109	0.097	0.113	0.15	0.126	0.119	0.156	0.095	0.141	0.153	0.089	0.095	0.07	0.13
	03:45:06	0.07	0.069	0.07	0.072	0.409	0.398	0.391	0.391	0.384	0.38	0.459	0.394	0.39	0.386	0.375	0.39	0.399	0.367	0.388	0.482	0.402	0.387	0.169	0.123	0.127	0.127	0.107	0.128	0.174	0.136	0.134	0.163	0.117	0.124	0.118	0.104	0.123	0.163	0.14	0.129	0.166	0.096	0.15	0.162	0.091	0.097	0.07	0.136
	03:50:06	0.071	0.069	0.07	0.073	0.413	0.397	0.411	0.403	0.391	0.389	0.463	0.403	0.404	0.395	0.384	0.399	0.403	0.375	0.393	0.48	0.407	0.399	0.191	0.135	0.142	0.143	0.117	0.143	0.197	0.151	0.149	0.181	0.129	0.139	0.132	0.113	0.138	0.18	0.153	0.144	0.178	0.098	0.16	0.174	0.093	0.099	0.07	0.144
	03:55:06	0.072	0.07	0.07	0.074	0.418	0.399	0.399	0.392	0.386	0.381	0.459	0.396	0.399	0.397	0.381	0.395	0.396	0.368	0.391	0.488	0.406	0.393	0.205	0.151	0.157	0.156	0.128	0.156	0.202	0.163	0.161	0.197	0.143	0.153	0.146	0.123	0.152	0.191	0.169	0.156	0.192	0.101	0.172	0.187	0.096	0.104	0.071	0.154
	04:00:06	0.072	0.07	0.07	0.074	0.412	0.397	0.403	0.394	0.392	0.383	0.46	0.396	0.398	0.404	0.384	0.402	0.405	0.367	0.395	0.49	0.408	0.39	0.228	0.163	0.171	0.171	0.142	0.173	0.219	0.183	0.181	0.211	0.157	0.166	0.159	0.137	0.166	0.21	0.189	0.173	0.201	0.103	0.184	0.2	0.097	0.107	0.071	0.161
	04:05:06	0.072	0.07	0.07	0.074	0.424	0.403	0.405	0.401	0.39	0.389	0.472	0.406	0.405	0.407	0.391	0.405	0.411	0.373	0.401	0.506	0.419	0.397	0.258	0.181	0.193	0.19	0.156	0.191	0.248	0.197	0.198	0.239	0.172	0.189	0.176	0.151	0.187	0.233	0.199	0.19	0.208	0.106	0.197	0.209	0.099	0.11	0.071	0.17
	04:10:06	0.072	0.07	0.07	0.074	0.436	0.41	0.416	0.404	0.392	0.393	0.48	0.409	0.409	0.414	0.391	0.413	0.419	0.379	0.404	0.518	0.42	0.4	0.282	0.199	0.206	0.206	0.171	0.207	0.277	0.217	0.216	0.265	0.192	0.2	0.192	0.166	0.2	0.261	0.226	0.208	0.218	0.108	0.206	0.218	0.101	0.114	0.071	0.18
	04:15:06	0.071	0.069	0.07	0.073	0.437	0.408	0.418	0.411	0.399	0.395	0.489	0.415	0.409	0.419	0.398	0.422	0.423	0.378	0.414	0.536	0.426	0.412	0.297	0.217	0.225	0.226	0.187	0.227	0.294	0.24	0.237	0.276	0.209	0.219	0.209	0.183	0.219	0.286	0.246	0.232	0.229	0.112	0.214	0.229	0.103	0.118	0.071	0.19
	04:20:06	0.071	0.069	0.07	0.073	0.463	0.428	0.423	0.422	0.403	0.406	0.514	0.425	0.424	0.432	0.41	0.432	0.444	0.387	0.429	0.56	0.444	0.418	0.308	0.24	0.254	0.254	0.209	0.255	0.319	0.269	0.271	0.312	0.23	0.246	0.235	0.202	0.247	0.316	0.275	0.265	0.241	0.115	0.224	0.241	0.105	0.122	0.071	0.201
	04:25:06	0.071	0.069	0.07	0.072	0.458	0.428	0.432	0.423	0.408	0.408	0.52	0.427	0.432	0.439	0.411	0.435	0.444	0.388	0.431	0.567	0.447	0.424	0.327	0.252	0.267	0.265	0.219	0.269	0.322	0.28	0.281	0.317	0.244	0.259	0.246	0.212	0.258	0.324	0.287	0.273	0.252	0.117	0.235	0.251	0.108	0.127	0.071	0.208
	04:30:06	0.071	0.069	0.07	0.073	0.463	0.431	0.436	0.429	0.411	0.415	0.524	0.432	0.433	0.444	0.416	0.441	0.45	0.394	0.438	0.578	0.452	0.428	0.356	0.284	0.292	0.291	0.246	0.291	0.35	0.314	0.312	0.341	0.277	0.285	0.274	0.24	0.284	0.348	0.317	0.308	0.265	0.12	0.248	0.264	0.11	0.132	0.071	0.219
	04:35:06	0.072	0.07	0.07	0.073	0.481	0.448	0.451	0.442	0.42	0.423	0.542	0.444	0.444	0.457	0.427	0.459	0.474	0.403	0.452	0.601	0.472	0.446	0.351	0.309	0.317	0.31	0.267	0.31	0.36	0.335	0.336	0.369	0.3	0.311	0.297	0.26	0.31	0.371	0.339	0.331	0.276	0.124	0.259	0.275	0.113	0.138	0.071	0.23
	04:40:06	0.073	0.071	0.071	0.076	0.475	0.444	0.449	0.449	0.424	0.429	0.554	0.449	0.448	0.459	0.427	0.459	0.477	0.407	0.46	0.61	0.471	0.446	0.354	0.334	0.336	0.334	0.293	0.336	0.358	0.359	0.359	0.363	0.324	0.325	0.32	0.288	0.328	0.393	0.361	0.345	0.285	0.128	0.273	0.287	0.116	0.145	0.071	0.242
	04:45:06	0.073	0.07	0.071	0.075	0.493	0.456	0.454	0.452	0.429	0.437	0.557	0.454	0.456	0.467	0.439	0.463	0.479	0.412	0.461	0.616	0.472	0.452	0.356	0.344	0.344	0.34	0.304	0.34	0.35	0.364	0.374	0.357	0.338	0.338	0.33	0.298	0.335	0.387	0.355	0.356	0.293	0.131	0.283	0.295	0.12	0.15	0.071	0.251
	04:50:06	0.073	0.071	0.071	0.075	0.517	0.476	0.471	0.468	0.441	0.451	0.573	0.474	0.474	0.488	0.453	0.481	0.498	0.421	0.481	0.637	0.498	0.477	0.362	0.362	0.371	0.363	0.33	0.364	0.356	0.367	0.366	0.361	0.36	0.365	0.356	0.335	0.369	0.393	0.357	0.361	0.305	0.135	0.293	0.302	0.123	0.158	0.071	0.261
	04:55:06	0.073	0.071	0.07	0.074	0.538	0.488	0.482	0.477	0.446	0.458	0.586	0.481	0.482	0.499	0.46	0.49	0.512	0.425	0.491	0.651	0.508	0.484	0.357	0.364	0.362	0.354	0.353	0.354	0.361	0.359	0.358	0.366	0.384	0.352	0.36	0.351	0.353	0.395	0.354	0.356	0.316	0.139	0.302	0.312	0.126	0.165	0.071	0.271
	05:00:06	0.072	0.069	0.07	0.073	0.555	0.498	0.492	0.488	0.463	0.468	0.603	0.491	0.494	0.518	0.466	0.507	0.525	0.432	0.505	0.666	0.524	0.498	0.375	0.36	0.354	0.351	0.378	0.347	0.374	0.357	0.36	0.375	0.361	0.345	0.35	0.373	0.344	0.398	0.354	0.354	0.325	0.143	0.308	0.319	0.128	0.171	0.071	0.279
	05:05:06	0.071	0.069	0.07	0.073	0.544	0.499	0.495	0.488	0.466	0.47	0.611	0.492	0.496	0.519	0.468	0.504	0.513	0.44	0.506	0.675	0.521	0.502	0.381	0.359	0.352	0.35	0.347	0.345	0.376	0.351	0.355	0.377	0.355	0.345	0.346	0.349	0.344	0.413	0.368	0.35	0.334	0.145	0.318	0.328	0.129	0.175	0.071	0.286
	05:10:06	0.072	0.069	0.07	0.073	0.564	0.513	0.497	0.492	0.471	0.473	0.622	0.498	0.507	0.533	0.479	0.518	0.532	0.448	0.523	0.695	0.533	0.513	0.384	0.365	0.359	0.359	0.355	0.357	0.383	0.368	0.363	0.38	0.363	0.359	0.358	0.359	0.349	0.415	0.373	0.362	0.344	0.15	0.331	0.339	0.134	0.184	0.071	0.297
	05:15:06	0.072	0.069	0.07	0.074	0.596	0.529	0.515	0.51	0.486	0.491	0.64	0.515	0.525	0.553	0.493	0.536	0.558	0.459	0.54	0.714	0.555	0.527	0.383	0.378	0.379	0.38	0.357	0.37	0.384	0.38	0.37	0.383	0.367	0.371	0.364	0.358	0.362	0.421	0.373	0.37	0.356	0.155	0.341	0.349	0.138	0.192	0.071	0.304
	05:20:06	0.075	0.072	0.073	0.076	0.578	0.519	0.51	0.512	0.482	0.489	0.641	0.509	0.521	0.548	0.5	0.537	0.552	0.477	0.547	0.723	0.556	0.53	0.395	0.386	0.379	0.375	0.36	0.375	0.389	0.377	0.383	0.393	0.379	0.379	0.378	0.363	0.371	0.429	0.378	0.368	0.368	0.161	0.353	0.359	0.143	0.199	0.073	0.314
	05:25:06	0.072	0.07	0.07	0.074	0.639	0.56	0.535	0.538	0.507	0.513	0.679	0.545	0.56	0.587	0.513	0.561	0.576	0.479	0.569	0.745	0.587	0.568	0.395	0.39	0.38	0.376	0.369	0.37	0.392	0.383	0.385	0.389	0.386	0.374	0.378	0.363	0.368	0.434	0.377	0.382	0.376	0.167	0.361	0.367	0.146	0.204	0.072	0.323
	05:30:06	0.071	0.07	0.07	0.073	0.652	0.57	0.539	0.536	0.51	0.517	0.678	0.545	0.565	0.598	0.519	0.565	0.583	0.481	0.573	0.756	0.593	0.573	0.393	0.386	0.381	0.38	0.366	0.369	0.397	0.378	0.375	0.393	0.382	0.373	0.376	0.372	0.365	0.425	0.376	0.377	0.386	0.172	0.371	0.375	0.149	0.209	0.071	0.331
	05:35:06	0.072	0.069	0.07	0.074	0.673	0.586	0.549	0.547	0.521	0.529	0.693	0.558	0.581	0.615	0.533	0.58	0.596	0.49	0.587	0.773	0.609	0.59	0.394	0.39	0.383	0.379	0.368	0.373	0.399	0.38	0.381	0.396	0.385	0.379	0.379	0.373	0.37	0.434	0.378	0.38	0.397	0.178	0.38	0.384	0.154	0.216	0.072	0.341
	05:40:06	0.073	0.071	0.071	0.076	0.697	0.61	0.572	0.574	0.544	0.549	0.718	0.581	0.606	0.632	0.55	0.605	0.628	0.505	0.607	0.79	0.625	0.611	0.406	0.405	0.39	0.389	0.386	0.384	0.407	0.392	0.397	0.397	0.398	0.38	0.385	0.38	0.374	0.452	0.388	0.392	0.412	0.186	0.392	0.397	0.161	0.227	0.072	0.354
	05:45:06	0.072	0.07	0.07	0.073	0.702	0.613	0.582	0.581	0.545	0.553	0.724	0.584	0.604	0.646	0.559	0.62	0.63	0.515	0.62	0.799	0.636	0.613	0.408	0.403	0.39	0.39	0.385	0.383	0.409	0.391	0.394	0.399	0.397	0.38	0.387	0.382	0.373	0.457	0.389	0.389	0.423	0.189	0.4	0.405	0.164	0.233	0.072	0.359
	05:50:06	0.074	0.071	0.071	0.075	0.738	0.652	0.609	0.607	0.578	0.578	0.757	0.616	0.649	0.672	0.582	0.638	0.655	0.532	0.644	0.829	0.661	0.648	0.423	0.413	0.398	0.394	0.391	0.389	0.42	0.399	0.4	0.411	0.404	0.383	0.39	0.389	0.377	0.462	0.395	0.4	0.435	0.198	0.412	0.417	0.171	0.246	0.073	0.371
	05:55:06	0.072	0.069	0.07	0.074	0.726	0.636	0.598	0.592	0.563	0.566	0.744	0.603	0.631	0.667	0.569	0.634	0.645	0.524	0.639	0.828	0.654	0.638	0.415	0.406	0.395	0.389	0.381	0.383	0.418	0.395	0.395	0.41	0.397	0.383	0.387	0.383	0.385	0.459	0.39	0.398	0.433	0.2	0.417	0.421	0.172	0.248	0.072	0.375
	06:00:06	0.072	0.07	0.07	0.074	0.745	0.645	0.607	0.603	0.571	0.57	0.753	0.61	0.639	0.683	0.581	0.651	0.66	0.532	0.655	0.841	0.665	0.649	0.419	0.407	0.396	0.39	0.384	0.386	0.422	0.396	0.399	0.415	0.4	0.388	0.39	0.386	0.383	0.47	0.4	0.4	0.437	0.204	0.426	0.43	0.175	0.254	0.072	0.38
	06:05:06	0.075	0.072	0.072	0.077	0.772	0.671	0.628	0.625	0.596	0.591	0.784	0.632	0.675	0.703	0.6	0.665	0.686	0.549	0.674	0.864	0.685	0.673	0.438	0.418	0.403	0.398	0.391	0.393	0.434	0.404	0.409	0.424	0.409	0.393	0.395	0.392	0.386	0.479	0.412	0.413	0.444	0.212	0.437	0.441	0.181	0.266	0.073	0.389
	06:10:06	0.074	0.072	0.072	0.077	0.791	0.688	0.635	0.632	0.606	0.605	0.799	0.643	0.685	0.717	0.609	0.675	0.696	0.56	0.685	0.882	0.7	0.689	0.444	0.423	0.405	0.404	0.393	0.397	0.442	0.409	0.417	0.432	0.411	0.398	0.398	0.394	0.391	0.492	0.415	0.418	0.448	0.219	0.451	0.452	0.187	0.275	0.073	0.397
	06:15:06	0.076	0.073	0.073	0.078	0.82	0.718	0.663	0.658	0.636	0.628	0.824	0.664	0.709	0.74	0.634	0.693	0.713	0.581	0.704	0.901	0.722	0.715	0.462	0.431	0.413	0.414	0.402	0.406	0.453	0.421	0.429	0.451	0.416	0.404	0.405	0.398	0.398	0.512	0.422	0.426	0.455	0.229	0.46	0.464	0.195	0.286	0.074	0.407
	06:20:06	0.073	0.072	0.071	0.076	0.821	0.712	0.656	0.649	0.629	0.623	0.82	0.662	0.71	0.742	0.63	0.697	0.716	0.579	0.713	0.908	0.723	0.712	0.462	0.439	0.42	0.417	0.406	0.409	0.46	0.426	0.433	0.459	0.425	0.411	0.414	0.405	0.406	0.518	0.428	0.429	0.454	0.234	0.463	0.466	0.198	0.294	0.073	0.413
	06:25:06	0.076	0.073	0.072	0.078	0.839	0.736	0.682	0.679	0.655	0.648	0.839	0.688	0.734	0.764	0.654	0.722	0.732	0.6	0.73	0.923	0.742	0.731	0.48	0.448	0.431	0.429	0.416	0.42	0.473	0.435	0.443	0.479	0.434	0.418	0.427	0.411	0.412	0.538	0.436	0.438	0.459	0.242	0.47	0.473	0.207	0.303	0.074	0.422
	06:30:06	0.072	0.07	0.07	0.074	0.846	0.751	0.697	0.693	0.667	0.661	0.853	0.699	0.745	0.775	0.665	0.732	0.739	0.61	0.75	0.939	0.76	0.746	0.491	0.447	0.433	0.43	0.418	0.419	0.479	0.439	0.445	0.493	0.433	0.42	0.43	0.413	0.414	0.547	0.443	0.437	0.454	0.244	0.47	0.472	0.208	0.305	0.072	0.425
	06:35:06	0.073	0.07	0.071	0.074	0.861	0.771	0.718	0.71	0.685	0.684	0.874	0.721	0.761	0.791	0.682	0.742	0.76	0.629	0.757	0.956	0.768	0.76	0.511	0.47	0.449	0.445	0.431	0.433	0.499	0.455	0.463	0.504	0.45	0.434	0.444	0.427	0.429	0.567	0.456	0.46	0.462	0.252	0.475	0.477	0.215	0.316	0.072	0.433
	06:40:06	0.072	0.07	0.07	0.074	0.84	0.769	0.708	0.705	0.687	0.676	0.874	0.717	0.765	0.798	0.684	0.749	0.756	0.628	0.764	0.963	0.765	0.765	0.511	0.471	0.447	0.445	0.43	0.435	0.509	0.457	0.468	0.508	0.449	0.437	0.445	0.427	0.431	0.577	0.462	0.464	0.462	0.254	0.474	0.477	0.217	0.322	0.072	0.436
	06:45:06	0.073	0.07	0.07	0.074	0.87	0.792	0.739	0.731	0.706	0.699	0.897	0.731	0.785	0.813	0.706	0.763	0.782	0.648	0.785	0.981	0.781	0.78	0.529	0.494	0.46	0.458	0.441	0.447	0.526	0.475	0.488	0.532	0.466	0.447	0.458	0.434	0.443	0.6	0.481	0.478	0.47	0.261	0.477	0.479	0.222	0.331	0.072	0.442
	06:50:06	0.075	0.072	0.072	0.077	0.889	0.8	0.731	0.727	0.711	0.706	0.907	0.73	0.795	0.823	0.71	0.764	0.793	0.654	0.791	0.987	0.791	0.792	0.54	0.506	0.468	0.465	0.45	0.458	0.536	0.486	0.499	0.537	0.477	0.457	0.468	0.443	0.453	0.616	0.483	0.488	0.478	0.267	0.485	0.487	0.229	0.342	0.073	0.452
	06:55:06	0.077	0.073	0.073	0.079	0.9	0.807	0.744	0.728	0.727	0.711	0.918	0.746	0.807	0.834	0.713	0.78	0.805	0.664	0.803	1.003	0.801	0.8	0.553	0.517	0.478	0.475	0.458	0.466	0.54	0.493	0.51	0.549	0.486	0.468	0.471	0.453	0.46	0.624	0.488	0.492	0.486	0.275	0.489	0.492	0.236	0.352	0.074	0.46
	07:00:06	0.074	0.072	0.071	0.077	0.914	0.828	0.769	0.759	0.758	0.738	0.947	0.768	0.816	0.845	0.733	0.795	0.815	0.693	0.815	1.019	0.817	0.812	0.582	0.532	0.494	0.491	0.474	0.485	0.555	0.511	0.525	0.58	0.506	0.479	0.488	0.463	0.476	0.641	0.503	0.513	0.488	0.279	0.49	0.494	0.239	0.359	0.073	0.465
	07:05:06	0.074	0.072	0.071	0.077	0.924	0.828	0.765	0.759	0.755	0.737	0.953	0.766	0.821	0.852	0.737	0.799	0.821	0.692	0.824	1.021	0.82	0.815	0.581	0.539	0.503	0.502	0.486	0.496	0.57	0.518	0.532	0.587	0.518	0.485	0.503	0.474	0.486	0.656	0.511	0.518	0.489	0.282	0.492	0.495	0.242	0.365	0.073	0.469
	07:10:06	0.075	0.072	0.071	0.077	0.928	0.841	0.789	0.777	0.771	0.759	0.965	0.785	0.836	0.859	0.754	0.806	0.833	0.713	0.832	1.046	0.834	0.827	0.618	0.56	0.518	0.514	0.501	0.511	0.581	0.536	0.553	0.613	0.541	0.499	0.516	0.495	0.498	0.677	0.526	0.535	0.494	0.289	0.498	0.5	0.247	0.373	0.073	0.472
	07:15:06	0.073	0.07	0.071	0.075	0.938	0.844	0.789	0.779	0.77	0.763	0.967	0.789	0.839	0.865	0.755	0.809	0.835	0.715	0.839	1.05	0.841	0.834	0.625	0.567	0.521	0.519	0.508	0.517	0.592	0.544	0.563	0.622	0.546	0.502	0.521	0.502	0.504	0.685	0.534	0.543	0.491	0.291	0.5	0.503	0.248	0.375	0.072	0.47
	07:20:06	0.073	0.07	0.07	0.075	0.949	0.857	0.796	0.792	0.781	0.772	0.981	0.799	0.847	0.882	0.77	0.821	0.85	0.723	0.854	1.054	0.854	0.844	0.639	0.582	0.534	0.533	0.519	0.53	0.607	0.555	0.574	0.639	0.559	0.511	0.534	0.514	0.515	0.705	0.544	0.556	0.497	0.296	0.506	0.509	0.252	0.381	0.072	0.473
	07:25:06	0.072	0.07	0.071	0.075	0.957	0.872	0.805	0.802	0.799	0.786	0.996	0.813	0.86	0.897	0.781	0.827	0.852	0.736	0.863	1.067	0.862	0.855	0.651	0.596	0.536	0.538	0.529	0.541	0.617	0.564	0.59	0.654	0.571	0.513	0.538	0.523	0.522	0.717	0.553	0.565	0.498	0.301	0.51	0.515	0.255	0.388	0.073	0.476
	07:30:06	0.073	0.07	0.071	0.075	0.96	0.877	0.833	0.82	0.812	0.804	1.006	0.826	0.867	0.9	0.798	0.843	0.864	0.755	0.873	1.081	0.872	0.859	0.683	0.624	0.564	0.564	0.55	0.567	0.644	0.593	0.618	0.677	0.598	0.535	0.568	0.544	0.541	0.739	0.58	0.595	0.506	0.308	0.516	0.52	0.261	0.398	0.072	0.481
	07:35:06	0.073	0.071	0.07	0.075	0.97	0.887	0.839	0.833	0.828	0.819	1.017	0.84	0.87	0.906	0.805	0.848	0.873	0.764	0.879	1.091	0.879	0.868	0.699	0.636	0.58	0.579	0.568	0.583	0.659	0.611	0.633	0.688	0.614	0.55	0.582	0.563	0.556	0.75	0.598	0.609	0.509	0.314	0.521	0.524	0.267	0.406	0.072	0.485
	07:40:06	0.073	0.07	0.07	0.075	0.98	0.89	0.848	0.846	0.836	0.828	1.024	0.847	0.875	0.919	0.819	0.855	0.884	0.785	0.889	1.098	0.891	0.874	0.714	0.652	0.593	0.593	0.582	0.596	0.676	0.623	0.648	0.704	0.628	0.566	0.595	0.574	0.572	0.764	0.609	0.621	0.515	0.319	0.525	0.528	0.271	0.413	0.072	0.487
	07:45:06	0.073	0.071	0.071	0.075	0.982	0.895	0.846	0.842	0.837	0.826	1.031	0.848	0.88	0.928	0.821	0.855	0.886	0.781	0.892	1.101	0.893	0.882	0.726	0.661	0.595	0.593	0.585	0.602	0.683	0.628	0.651	0.719	0.634	0.567	0.599	0.577	0.578	0.773	0.611	0.621	0.512	0.32	0.524	0.528	0.273	0.418	0.073	0.487
	07:50:06	0.076	0.073	0.072	0.078	0.997	0.91	0.856	0.85	0.847	0.84	1.039	0.862	0.892	0.937	0.827	0.869	0.898	0.788	0.907	1.113	0.902	0.891	0.729	0.669	0.601	0.604	0.594	0.616	0.69	0.635	0.666	0.73	0.647	0.571	0.609	0.59	0.587	0.793	0.616	0.63	0.519	0.325	0.53	0.531	0.278	0.426	0.074	0.49
	07:55:06	0.076	0.073	0.072	0.078	1.002	0.916	0.873	0.872	0.867	0.858	1.056	0.875	0.898	0.947	0.847	0.879	0.908	0.813	0.914	1.129	0.914	0.898	0.755	0.694	0.634	0.636	0.622	0.642	0.722	0.667	0.689	0.748	0.671	0.604	0.64	0.618	0.613	0.814	0.65	0.659	0.528	0.329	0.536	0.538	0.284	0.434	0.073	0.495
	08:00:06	0.075	0.073	0.072	0.078	1.007	0.919	0.878	0.879	0.868	0.864	1.059	0.879	0.901	0.956	0.859	0.882	0.916	0.822	0.922	1.138	0.92	0.901	0.774	0.713	0.654	0.652	0.645	0.66	0.741	0.686	0.705	0.761	0.687	0.623	0.657	0.636	0.631	0.829	0.666	0.674	0.533	0.334	0.539	0.543	0.289	0.442	0.074	0.499
	08:05:06	0.075	0.073	0.072	0.078	1.017	0.925	0.884	0.889	0.877	0.873	1.068	0.887	0.906	0.956	0.862	0.888	0.922	0.833	0.923	1.151	0.927	0.911	0.786	0.725	0.667	0.67	0.663	0.676	0.763	0.701	0.719	0.77	0.692	0.634	0.674	0.652	0.647	0.847	0.681	0.686	0.534	0.339	0.541	0.544	0.294	0.449	0.073	0.503
	08:10:06	0.074	0.071	0.071	0.075	1.026	0.928	0.889	0.89	0.879	0.878	1.071	0.892	0.909	0.968	0.869	0.889	0.928	0.837	0.93	1.145	0.932	0.912	0.798	0.729	0.672	0.672	0.665	0.681	0.766	0.706	0.725	0.78	0.701	0.636	0.677	0.657	0.651	0.858	0.684	0.692	0.535	0.342	0.542	0.545	0.294	0.452	0.073	0.503
	08:15:06	0.075	0.073	0.072	0.078	1.03	0.941	0.898	0.902	0.893	0.891	1.087	0.906	0.919	0.98	0.879	0.902	0.939	0.851	0.929	1.163	0.94	0.923	0.814	0.746	0.697	0.696	0.683	0.7	0.787	0.725	0.737	0.796	0.716	0.662	0.701	0.675	0.673	0.874	0.709	0.715	0.542	0.349	0.549	0.55	0.3	0.464	0.074	0.511
	08:20:06	0.076	0.073	0.072	0.078	1.042	0.943	0.904	0.909	0.897	0.896	1.092	0.908	0.922	0.983	0.882	0.91	0.946	0.852	0.94	1.162	0.942	0.923	0.828	0.757	0.703	0.702	0.695	0.71	0.79	0.735	0.748	0.811	0.73	0.666	0.709	0.689	0.681	0.886	0.716	0.726	0.548	0.351	0.554	0.555	0.303	0.467	0.074	0.513
	08:25:06	0.074	0.071	0.071	0.075	1.042	0.953	0.911	0.913	0.903	0.899	1.1	0.913	0.929	0.991	0.892	0.915	0.949	0.868	0.949	1.169	0.954	0.938	0.834	0.767	0.724	0.723	0.713	0.725	0.816	0.749	0.759	0.816	0.738	0.684	0.727	0.699	0.703	0.901	0.733	0.736	0.548	0.355	0.555	0.555	0.305	0.468	0.073	0.516
	08:30:06	0.076	0.073	0.072	0.078	1.048	0.956	0.917	0.92	0.912	0.912	1.109	0.923	0.941	0.995	0.895	0.919	0.952	0.871	0.953	1.177	0.954	0.938	0.848	0.78	0.732	0.734	0.725	0.736	0.82	0.762	0.769	0.835	0.758	0.695	0.739	0.717	0.717	0.914	0.748	0.749	0.553	0.361	0.559	0.561	0.311	0.474	0.074	0.522
	08:35:06	0.074	0.071	0.071	0.076	1.054	0.96	0.923	0.93	0.916	0.915	1.117	0.926	0.938	1	0.9	0.924	0.957	0.882	0.96	1.181	0.963	0.946	0.848	0.789	0.746	0.745	0.737	0.746	0.84	0.769	0.776	0.838	0.756	0.706	0.749	0.722	0.726	0.934	0.755	0.754	0.555	0.363	0.56	0.562	0.312	0.471	0.073	0.523
	08:40:06	0.076	0.074	0.072	0.078	1.061	0.964	0.931	0.936	0.92	0.926	1.122	0.936	0.946	1.012	0.909	0.93	0.964	0.886	0.967	1.189	0.967	0.946	0.864	0.804	0.764	0.766	0.755	0.762	0.854	0.784	0.789	0.848	0.771	0.723	0.768	0.737	0.741	0.956	0.773	0.766	0.564	0.369	0.565	0.565	0.317	0.478	0.074	0.529
	08:45:06	0.074	0.071	0.071	0.076	1.072	0.968	0.933	0.934	0.922	0.925	1.12	0.933	0.948	1.013	0.91	0.932	0.968	0.888	0.971	1.181	0.97	0.953	0.874	0.803	0.76	0.761	0.753	0.763	0.853	0.784	0.794	0.855	0.776	0.72	0.766	0.741	0.744	0.96	0.769	0.772	0.561	0.37	0.563	0.565	0.315	0.473	0.073	0.526
	08:50:06	0.074	0.072	0.071	0.076	1.074	0.981	0.939	0.942	0.93	0.937	1.127	0.945	0.954	1.025	0.919	0.938	0.976	0.894	0.981	1.182	0.979	0.958	0.879	0.808	0.765	0.762	0.755	0.77	0.86	0.793	0.796	0.863	0.787	0.729	0.774	0.751	0.756	0.977	0.773	0.779	0.563	0.372	0.564	0.566	0.315	0.472	0.073	0.527
	08:55:06	0.074	0.072	0.071	0.076	1.089	0.994	0.947	0.955	0.94	0.943	1.135	0.95	0.965	1.025	0.928	0.946	0.98	0.909	0.982	1.198	0.988	0.971	0.89	0.824	0.781	0.786	0.781	0.789	0.886	0.805	0.81	0.87	0.797	0.748	0.789	0.765	0.772	1.003	0.79	0.787	0.574	0.378	0.573	0.574	0.32	0.478	0.073	0.533
	09:00:06	0.076	0.074	0.072	0.079	1.092	0.993	0.958	0.959	0.945	0.953	1.14	0.959	0.975	1.032	0.935	0.954	0.995	0.914	0.993	1.2	0.992	0.971	0.907	0.827	0.791	0.793	0.788	0.797	0.897	0.813	0.817	0.885	0.806	0.755	0.802	0.776	0.782	1.009	0.8	0.796	0.581	0.385	0.58	0.58	0.325	0.484	0.075	0.538
	09:05:06	0.077	0.074	0.072	0.078	1.092	0.997	0.963	0.962	0.951	0.958	1.141	0.964	0.978	1.039	0.941	0.958	1	0.921	1	1.202	0.998	0.979	0.914	0.837	0.803	0.808	0.802	0.807	0.913	0.824	0.825	0.893	0.815	0.766	0.812	0.786	0.792	1.022	0.813	0.804	0.586	0.389	0.583	0.583	0.327	0.488	0.074	0.542
	09:10:06	0.077	0.074	0.072	0.078	1.091	0.999	0.964	0.967	0.957	0.961	1.145	0.965	0.98	1.038	0.946	0.964	1.005	0.924	1.003	1.205	0.997	0.98	0.922	0.841	0.807	0.811	0.803	0.809	0.92	0.829	0.828	0.9	0.818	0.773	0.815	0.791	0.798	1.034	0.819	0.809	0.59	0.395	0.585	0.585	0.33	0.492	0.075	0.546
	09:15:06	0.077	0.074	0.072	0.078	1.101	1.005	0.971	0.966	0.963	0.967	1.147	0.971	0.986	1.046	0.947	0.969	1.009	0.935	1.011	1.205	1.004	0.989	0.93	0.844	0.815	0.818	0.808	0.817	0.933	0.836	0.836	0.91	0.827	0.781	0.825	0.796	0.809	1.041	0.824	0.815	0.592	0.398	0.588	0.588	0.331	0.494	0.075	0.547
	09:20:06	0.074	0.071	0.071	0.076	1.101	1.013	0.971	0.967	0.967	0.961	1.148	0.966	0.989	1.045	0.95	0.975	1.014	0.936	1.013	1.199	1.004	0.991	0.935	0.853	0.82	0.82	0.81	0.821	0.939	0.839	0.842	0.917	0.835	0.784	0.828	0.802	0.815	1.048	0.833	0.822	0.594	0.4	0.59	0.59	0.329	0.491	0.074	0.546
	09:25:06	0.074	0.072	0.071	0.077	1.101	1.02	0.976	0.972	0.975	0.973	1.154	0.975	0.993	1.05	0.955	0.978	1.02	0.944	1.021	1.204	1.009	0.998	0.943	0.864	0.826	0.827	0.819	0.831	0.95	0.851	0.854	0.923	0.843	0.792	0.837	0.814	0.828	1.06	0.842	0.837	0.598	0.403	0.592	0.592	0.33	0.493	0.074	0.547
	09:30:06	0.077	0.074	0.072	0.079	1.102	1.015	0.982	0.975	0.978	0.979	1.157	0.978	1	1.055	0.959	0.987	1.024	0.946	1.023	1.205	1.01	0.997	0.954	0.877	0.845	0.849	0.838	0.849	0.969	0.863	0.867	0.933	0.854	0.813	0.856	0.827	0.843	1.076	0.856	0.84	0.608	0.409	0.596	0.596	0.334	0.5	0.075	0.553
	09:35:06	0.074	0.072	0.071	0.077	1.104	1.017	0.984	0.979	0.981	0.981	1.158	0.981	1.001	1.06	0.964	0.991	1.026	0.952	1.03	1.208	1.013	1.004	0.963	0.882	0.853	0.857	0.846	0.856	0.978	0.87	0.873	0.939	0.862	0.821	0.865	0.838	0.854	1.088	0.867	0.849	0.612	0.414	0.602	0.601	0.337	0.503	0.075	0.555
	09:40:06	0.075	0.072	0.071	0.076	1.107	1.02	0.985	0.979	0.985	0.984	1.159	0.985	1.008	1.062	0.971	0.992	1.031	0.96	1.037	1.212	1.019	1.007	0.967	0.886	0.852	0.857	0.85	0.86	0.984	0.874	0.875	0.947	0.866	0.821	0.866	0.839	0.859	1.099	0.867	0.855	0.611	0.416	0.604	0.603	0.335	0.504	0.075	0.555
	09:45:06	0.074	0.072	0.071	0.076	1.098	1.02	0.985	0.981	0.99	0.989	1.162	0.986	1.003	1.061	0.969	0.992	1.033	0.961	1.039	1.214	1.018	1.007	0.974	0.89	0.854	0.859	0.854	0.867	0.992	0.88	0.881	0.957	0.874	0.824	0.867	0.845	0.866	1.106	0.874	0.862	0.608	0.419	0.604	0.603	0.337	0.505	0.075	0.554
	09:50:06	0.078	0.075	0.072	0.079	1.108	1.031	0.993	0.996	1.002	1	1.17	0.993	1.011	1.063	0.981	0.997	1.036	0.975	1.038	1.218	1.023	1.008	0.979	0.903	0.867	0.877	0.869	0.877	1.004	0.889	0.886	0.962	0.88	0.837	0.883	0.854	0.876	1.123	0.883	0.862	0.63	0.424	0.616	0.613	0.343	0.516	0.076	0.562
	09:55:06	0.075	0.073	0.071	0.077	1.112	1.022	0.99	0.989	0.99	0.991	1.162	0.985	1.001	1.061	0.979	0.998	1.039	0.972	1.042	1.216	1.02	1.007	0.986	0.903	0.871	0.881	0.873	0.88	1.007	0.89	0.889	0.969	0.887	0.844	0.888	0.86	0.884	1.131	0.888	0.869	0.631	0.425	0.621	0.62	0.345	0.519	0.076	0.563
	10:00:06	0.074	0.073	0.071	0.077	1.109	1.022	0.992	0.986	0.994	0.996	1.161	0.987	1.003	1.066	0.975	0.999	1.032	0.968	1.042	1.212	1.014	1.006	0.992	0.908	0.877	0.883	0.879	0.887	1.017	0.894	0.895	0.975	0.893	0.851	0.893	0.867	0.891	1.135	0.889	0.872	0.628	0.425	0.622	0.62	0.346	0.52	0.076	0.563
	10:05:06	0.074	0.073	0.071	0.077	1.109	1.03	0.996	0.997	1.003	1.002	1.166	0.995	1.009	1.077	0.991	1.004	1.043	0.985	1.053	1.219	1.027	1.015	1.001	0.916	0.887	0.892	0.885	0.894	1.027	0.903	0.899	0.981	0.901	0.859	0.901	0.875	0.904	1.144	0.9	0.883	0.638	0.426	0.625	0.623	0.347	0.522	0.076	0.567
	10:10:06	0.077	0.075	0.072	0.08	1.108	1.033	1.002	0.998	1.007	1.009	1.174	1	1.014	1.071	0.994	1.008	1.046	0.984	1.053	1.222	1.026	1.013	1.007	0.919	0.89	0.898	0.893	0.901	1.036	0.909	0.907	0.991	0.906	0.865	0.909	0.883	0.908	1.155	0.908	0.885	0.649	0.43	0.634	0.631	0.352	0.53	0.077	0.573
	10:15:06	0.077	0.075	0.072	0.08	1.109	1.031	1.002	0.996	1.003	1.007	1.174	0.996	1.013	1.075	0.995	1.01	1.048	0.983	1.054	1.218	1.021	1.014	1.014	0.922	0.893	0.9	0.895	0.905	1.042	0.911	0.908	0.999	0.912	0.869	0.913	0.888	0.914	1.159	0.912	0.892	0.653	0.432	0.642	0.638	0.355	0.533	0.078	0.577
	10:20:06	0.077	0.075	0.072	0.08	1.099	1.04	1.003	1.009	1.017	1.017	1.175	0.998	1.019	1.075	0.997	1.015	1.05	0.998	1.056	1.216	1.031	1.021	1.016	0.932	0.9	0.909	0.906	0.912	1.05	0.921	0.915	1.003	0.918	0.876	0.92	0.894	0.926	1.16	0.919	0.897	0.658	0.435	0.647	0.644	0.358	0.538	0.079	0.581
	10:25:06	0.075	0.073	0.071	0.077	1.105	1.036	1	1.004	1.012	1.011	1.173	0.994	1.014	1.077	0.997	1.012	1.05	0.989	1.06	1.215	1.027	1.022	1.023	0.934	0.902	0.909	0.903	0.913	1.054	0.919	0.92	1.006	0.921	0.878	0.921	0.898	0.928	1.166	0.923	0.903	0.658	0.437	0.65	0.647	0.36	0.538	0.079	0.58
	10:30:06	0.075	0.073	0.071	0.077	1.104	1.032	0.997	0.999	1.009	1.01	1.171	0.992	1.014	1.08	0.994	1.008	1.046	0.99	1.059	1.213	1.024	1.02	1.027	0.936	0.906	0.912	0.907	0.919	1.062	0.922	0.922	1.012	0.926	0.884	0.928	0.903	0.936	1.167	0.925	0.908	0.656	0.435	0.649	0.647	0.36	0.537	0.079	0.581
	10:35:06	0.075	0.073	0.071	0.078	1.101	1.039	1	1.003	1.015	1.015	1.175	0.997	1.02	1.08	0.998	1.012	1.05	0.992	1.061	1.214	1.024	1.023	1.042	0.942	0.913	0.917	0.911	0.925	1.071	0.928	0.931	1.021	0.93	0.89	0.934	0.909	0.943	1.172	0.931	0.916	0.66	0.438	0.654	0.652	0.362	0.541	0.08	0.583
	10:40:06	0.078	0.075	0.073	0.08	1.097	1.038	1.006	1.005	1.014	1.02	1.172	0.997	1.017	1.082	1.003	1.017	1.054	0.996	1.062	1.212	1.031	1.023	1.049	0.952	0.926	0.931	0.925	0.937	1.085	0.941	0.943	1.031	0.939	0.902	0.95	0.92	0.954	1.177	0.943	0.92	0.67	0.443	0.661	0.658	0.367	0.548	0.081	0.589
	10:45:06	0.077	0.075	0.072	0.08	1.098	1.046	1.012	1.016	1.026	1.031	1.177	1.006	1.021	1.085	1.011	1.021	1.058	1.006	1.07	1.211	1.031	1.024	1.047	0.959	0.924	0.935	0.93	0.94	1.093	0.943	0.941	1.032	0.944	0.905	0.948	0.923	0.957	1.185	0.946	0.927	0.675	0.444	0.664	0.662	0.37	0.55	0.082	0.59
	10:50:06	0.075	0.073	0.071	0.077	1.096	1.04	1.002	1.005	1.02	1.021	1.174	0.996	1.017	1.079	1.004	1.017	1.052	0.999	1.067	1.209	1.028	1.026	1.059	0.957	0.926	0.934	0.929	0.941	1.095	0.943	0.948	1.034	0.944	0.906	0.95	0.925	0.959	1.189	0.948	0.934	0.672	0.446	0.665	0.663	0.371	0.549	0.082	0.588
	10:55:06	0.075	0.074	0.072	0.077	1.098	1.044	1.011	1.014	1.021	1.027	1.172	0.997	1.015	1.08	1.007	1.02	1.053	1.003	1.069	1.207	1.029	1.025	1.057	0.963	0.937	0.944	0.938	0.95	1.105	0.952	0.954	1.043	0.949	0.915	0.962	0.931	0.969	1.194	0.958	0.937	0.68	0.45	0.672	0.67	0.374	0.554	0.084	0.593
	11:00:06	0.076	0.074	0.072	0.077	1.097	1.046	1.007	1.012	1.023	1.024	1.174	0.995	1.017	1.083	1.01	1.024	1.057	1.006	1.073	1.205	1.029	1.032	1.066	0.97	0.94	0.95	0.941	0.953	1.11	0.956	0.958	1.045	0.954	0.919	0.965	0.939	0.976	1.199	0.958	0.941	0.681	0.452	0.673	0.672	0.377	0.555	0.085	0.594
	11:05:06	0.078	0.076	0.073	0.08	1.096	1.042	1.015	1.015	1.026	1.033	1.177	1.002	1.021	1.082	1.014	1.029	1.057	1.009	1.078	1.203	1.03	1.032	1.069	0.982	0.953	0.96	0.951	0.964	1.121	0.968	0.967	1.059	0.964	0.932	0.982	0.947	0.99	1.202	0.97	0.949	0.691	0.455	0.683	0.68	0.379	0.561	0.088	0.599
	11:10:06	0.076	0.074	0.071	0.078	1.092	1.047	1.011	1.015	1.03	1.032	1.176	1	1.024	1.086	1.014	1.025	1.061	1.011	1.08	1.198	1.033	1.034	1.07	0.984	0.954	0.96	0.952	0.964	1.122	0.97	0.969	1.058	0.97	0.933	0.978	0.953	0.995	1.203	0.972	0.959	0.687	0.456	0.679	0.679	0.376	0.56	0.088	0.597
	11:15:06	0.078	0.076	0.073	0.081	1.094	1.049	1.008	1.013	1.028	1.03	1.176	0.999	1.023	1.087	1.02	1.027	1.062	1.014	1.081	1.197	1.034	1.034	1.073	0.991	0.96	0.969	0.961	0.975	1.128	0.978	0.977	1.066	0.97	0.937	0.99	0.953	1.002	1.209	0.976	0.959	0.696	0.459	0.686	0.685	0.378	0.565	0.091	0.603
	11:20:06	0.078	0.076	0.073	0.081	1.094	1.048	1.014	1.013	1.031	1.037	1.178	1.001	1.025	1.08	1.015	1.028	1.06	1.009	1.084	1.195	1.029	1.033	1.08	0.987	0.962	0.969	0.961	0.975	1.131	0.979	0.977	1.065	0.974	0.945	0.993	0.959	1.005	1.212	0.976	0.963	0.694	0.463	0.687	0.686	0.378	0.567	0.093	0.604
	11:25:06	0.078	0.076	0.072	0.081	1.092	1.045	1.012	1.019	1.029	1.036	1.173	1	1.023	1.079	1.019	1.024	1.056	1.014	1.079	1.188	1.032	1.033	1.084	0.993	0.963	0.974	0.969	0.981	1.137	0.985	0.985	1.075	0.979	0.944	1	0.962	1.014	1.213	0.986	0.966	0.704	0.468	0.693	0.691	0.379	0.571	0.096	0.608
	11:30:06	0.075	0.074	0.072	0.077	1.098	1.039	1.006	1.009	1.022	1.027	1.17	0.998	1.027	1.082	1.015	1.019	1.058	1.015	1.08	1.184	1.028	1.032	1.086	0.998	0.964	0.975	0.972	0.984	1.136	0.985	0.984	1.076	0.984	0.943	0.998	0.968	1.018	1.214	0.983	0.967	0.704	0.469	0.692	0.693	0.378	0.569	0.097	0.608
	11:35:06	0.078	0.076	0.073	0.081	1.093	1.044	1.012	1.014	1.024	1.033	1.173	1.001	1.025	1.079	1.021	1.021	1.061	1.016	1.08	1.178	1.027	1.031	1.083	1.001	0.969	0.98	0.977	0.989	1.141	0.99	0.985	1.076	0.99	0.949	1.006	0.972	1.024	1.217	0.989	0.967	0.714	0.473	0.698	0.697	0.381	0.575	0.102	0.613
	11:40:06	0.076	0.074	0.072	0.078	1.098	1.047	1.009	1.008	1.022	1.028	1.174	1	1.03	1.085	1.015	1.022	1.059	1.011	1.081	1.179	1.028	1.035	1.082	1.003	0.966	0.974	0.977	0.991	1.138	0.985	0.99	1.072	0.99	0.948	1.002	0.976	1.022	1.217	0.986	0.974	0.701	0.472	0.696	0.695	0.379	0.572	0.104	0.611
	11:45:06	0.076	0.074	0.072	0.078	1.095	1.05	1.012	1.021	1.031	1.036	1.175	1.003	1.029	1.081	1.021	1.025	1.062	1.022	1.085	1.174	1.033	1.033	1.087	1.006	0.974	0.986	0.987	0.998	1.149	0.996	0.991	1.078	0.991	0.95	1.009	0.98	1.032	1.221	0.993	0.978	0.708	0.476	0.7	0.701	0.381	0.575	0.108	0.614
	11:50:06	0.077	0.074	0.072	0.079	1.1	1.042	1.006	1.008	1.021	1.028	1.173	1	1.03	1.082	1.017	1.02	1.059	1.015	1.081	1.173	1.03	1.037	1.089	1.004	0.971	0.978	0.983	0.997	1.142	0.989	0.993	1.08	0.992	0.953	1.007	0.979	1.029	1.224	0.987	0.979	0.704	0.478	0.7	0.701	0.381	0.575	0.111	0.615
	11:55:06	0.076	0.074	0.072	0.078	1.104	1.055	1.014	1.02	1.032	1.035	1.176	1.005	1.034	1.087	1.022	1.024	1.062	1.021	1.086	1.17	1.033	1.039	1.084	1.011	0.978	0.985	0.989	1.003	1.151	0.994	0.997	1.081	0.999	0.961	1.014	0.986	1.037	1.223	0.993	0.985	0.712	0.481	0.705	0.705	0.383	0.578	0.116	0.618
	12:00:06	0.079	0.077	0.073	0.082	1.105	1.057	1.024	1.024	1.037	1.044	1.178	1.012	1.041	1.09	1.028	1.033	1.065	1.024	1.092	1.174	1.034	1.042	1.095	1.017	0.985	0.997	0.997	1.012	1.159	1.003	1.004	1.096	1.014	0.967	1.025	1	1.042	1.228	1.004	0.994	0.713	0.485	0.708	0.71	0.385	0.582	0.123	0.618
[truncated: 136 more columns]

## Sheet: dLTGRep3
	Media	LB	LB+IPTG	LB0N	LB0N+IPTG	LB	LB	LB	LB	LB	LB	LB	LB	LB	LB+IPTG	LB+IPTG	LB+IPTG	LB+IPTG	LB+IPTG	LB+IPTG	LB+IPTG	LB+IPTG	LB+IPTG	LB	LB	LB	LB	LB	LB	LB	LB	LB	LB+IPTG	LB+IPTG	LB+IPTG	LB+IPTG	LB+IPTG	LB+IPTG	LB+IPTG	LB+IPTG	LB+IPTG	LB0N	LB0N	LB0N	LB0N	LB0N	LB0N	LB0N	LB0N
	Dilution Factor	Blank	Blank	Blank	Blank	0.001	0.001	0.001	0.001	0.001	0.001	0.001	0.001	0.001	0.001	0.001	0.001	0.001	0.001	0.001	0.001	0.001	0.001	1e-05	1e-05	1e-05	1e-05	1e-05	1e-05	1e-05	1e-05	1e-05	1e-05	1e-05	1e-05	1e-05	1e-05	1e-05	1e-05	1e-05	1e-05	0.001	0.001	0.001	0.001	0.001	0.001	0.001	0.001
	Background	N/A	N/A	N/A	N/A	WT	d6 LTG	d6 LTG	d6 LTG	d6 LTG	d6 LTG	d6 LTG	d6 LTG	d6 LTG	WT	d6 LTG	d6 LTG	d6 LTG	d6 LTG	d6 LTG	d6 LTG	d6 LTG	d6 LTG	WT	d6 LTG	d6 LTG	d6 LTG	d6 LTG	d6 LTG	d6 LTG	d6 LTG	d6 LTG	WT	d6 LTG	d6 LTG	d6 LTG	d6 LTG	d6 LTG	d6 LTG	d6 LTG	d6 LTG	WT	d6 LTG	d6 LTG	d6 LTG	d6 LTG	d6 LTG	d6 LTG	d6 LTG
	Ptac	N/A	N/A	N/A	N/A	empty	empty	mltA	mltB	mltC	mltD	mltF	slt70	EcmltE	empty	empty	mltA	mltB	mltC	mltD	mltF	slt70	EcmltE	empty	empty	mltA	mltB	mltC	mltD	mltF	slt70	EcmltE	empty	empty	mltA	mltB	mltC	mltD	mltF	slt70	EcmltE	empty	empty	mltA	mltB	mltC	mltD	mltF	slt70
	hr:min:sec
	00:01:04	0.071	0.07	0.07	0.069	0.075	0.072	0.072	0.069	0.07	0.068	0.07	0.069	0.07	0.072	0.069	0.068	0.067	0.067	0.067	0.069	0.07	0.07	0.07	0.068	0.068	0.065	0.066	0.065	0.065	0.066	0.067	0.07	0.067	0.067	0.066	0.065	0.066	0.066	0.069	0.07	0.071	0.069	0.068	0.066	0.067	0.067	0.066	0.068
	00:05:06	0.07	0.069	0.07	0.068	0.074	0.072	0.071	0.068	0.07	0.068	0.069	0.069	0.069	0.071	0.068	0.067	0.066	0.066	0.066	0.069	0.069	0.069	0.07	0.067	0.068	0.065	0.066	0.065	0.065	0.066	0.068	0.069	0.067	0.066	0.065	0.065	0.066	0.065	0.066	0.069	0.071	0.068	0.068	0.066	0.067	0.067	0.066	0.067
	00:10:06	0.07	0.069	0.07	0.069	0.074	0.071	0.071	0.068	0.07	0.068	0.069	0.069	0.069	0.071	0.068	0.067	0.066	0.066	0.066	0.069	0.069	0.069	0.069	0.067	0.068	0.065	0.066	0.065	0.064	0.066	0.068	0.069	0.066	0.066	0.065	0.065	0.066	0.065	0.066	0.069	0.071	0.068	0.068	0.066	0.067	0.067	0.066	0.068
	00:15:06	0.069	0.068	0.07	0.069	0.075	0.071	0.071	0.068	0.07	0.068	0.069	0.069	0.069	0.07	0.068	0.067	0.066	0.066	0.066	0.069	0.069	0.069	0.068	0.066	0.067	0.065	0.066	0.065	0.064	0.066	0.067	0.069	0.066	0.066	0.065	0.065	0.066	0.065	0.066	0.069	0.071	0.067	0.068	0.066	0.067	0.067	0.066	0.067
	00:20:05	0.068	0.068	0.069	0.069	0.075	0.072	0.071	0.068	0.07	0.068	0.07	0.069	0.069	0.071	0.068	0.067	0.066	0.066	0.066	0.069	0.07	0.07	0.068	0.066	0.067	0.064	0.065	0.064	0.064	0.065	0.067	0.068	0.066	0.066	0.064	0.065	0.065	0.065	0.066	0.069	0.071	0.067	0.067	0.066	0.066	0.066	0.066	0.067
	00:25:06	0.069	0.069	0.07	0.07	0.076	0.072	0.072	0.069	0.071	0.069	0.071	0.071	0.07	0.072	0.068	0.068	0.067	0.067	0.067	0.07	0.072	0.071	0.069	0.067	0.067	0.065	0.065	0.065	0.064	0.066	0.068	0.069	0.066	0.066	0.065	0.065	0.066	0.066	0.067	0.07	0.074	0.067	0.068	0.066	0.067	0.067	0.066	0.067
	00:30:06	0.07	0.069	0.07	0.07	0.077	0.073	0.072	0.07	0.071	0.07	0.072	0.072	0.072	0.074	0.07	0.069	0.068	0.068	0.069	0.071	0.073	0.072	0.069	0.067	0.067	0.065	0.066	0.065	0.064	0.066	0.068	0.069	0.066	0.066	0.065	0.065	0.066	0.066	0.067	0.07	0.076	0.068	0.068	0.066	0.067	0.067	0.066	0.068
	00:35:06	0.07	0.069	0.07	0.07	0.078	0.074	0.073	0.07	0.072	0.07	0.073	0.072	0.073	0.075	0.07	0.069	0.068	0.068	0.068	0.072	0.074	0.073	0.069	0.067	0.067	0.065	0.066	0.065	0.064	0.066	0.068	0.069	0.066	0.066	0.065	0.065	0.066	0.066	0.067	0.07	0.074	0.067	0.068	0.066	0.067	0.067	0.066	0.068
	00:40:06	0.069	0.069	0.07	0.07	0.08	0.075	0.074	0.07	0.072	0.071	0.074	0.073	0.073	0.077	0.071	0.07	0.069	0.069	0.069	0.073	0.075	0.075	0.069	0.067	0.067	0.065	0.065	0.065	0.064	0.065	0.067	0.069	0.066	0.066	0.065	0.065	0.066	0.066	0.067	0.07	0.072	0.068	0.068	0.066	0.067	0.067	0.066	0.067
	00:45:06	0.07	0.069	0.07	0.07	0.082	0.076	0.075	0.071	0.073	0.072	0.077	0.075	0.075	0.079	0.072	0.071	0.07	0.07	0.07	0.075	0.077	0.076	0.07	0.067	0.067	0.065	0.065	0.065	0.064	0.066	0.068	0.069	0.066	0.066	0.065	0.065	0.066	0.066	0.067	0.07	0.072	0.068	0.068	0.066	0.067	0.067	0.066	0.068
	00:50:06	0.069	0.069	0.07	0.07	0.084	0.077	0.076	0.072	0.074	0.073	0.079	0.077	0.076	0.082	0.073	0.073	0.071	0.071	0.071	0.077	0.08	0.079	0.07	0.067	0.067	0.065	0.065	0.065	0.064	0.066	0.067	0.069	0.066	0.066	0.065	0.065	0.066	0.066	0.067	0.07	0.072	0.068	0.068	0.066	0.067	0.067	0.066	0.068
	00:55:06	0.07	0.069	0.07	0.07	0.087	0.079	0.077	0.073	0.076	0.075	0.082	0.079	0.078	0.086	0.075	0.074	0.072	0.072	0.073	0.079	0.083	0.081	0.07	0.067	0.067	0.065	0.066	0.065	0.064	0.066	0.068	0.069	0.066	0.066	0.065	0.065	0.066	0.066	0.067	0.07	0.072	0.068	0.068	0.066	0.067	0.067	0.066	0.068
	01:00:06	0.07	0.07	0.07	0.071	0.091	0.081	0.08	0.075	0.078	0.078	0.085	0.083	0.082	0.091	0.078	0.077	0.074	0.074	0.075	0.082	0.086	0.086	0.07	0.067	0.067	0.065	0.066	0.065	0.065	0.066	0.069	0.07	0.067	0.066	0.065	0.065	0.066	0.066	0.067	0.07	0.073	0.068	0.069	0.067	0.067	0.067	0.067	0.069
	01:05:06	0.069	0.069	0.07	0.07	0.094	0.083	0.081	0.076	0.079	0.08	0.088	0.085	0.084	0.095	0.08	0.079	0.076	0.076	0.077	0.085	0.09	0.088	0.07	0.067	0.067	0.065	0.066	0.065	0.064	0.066	0.068	0.069	0.066	0.066	0.065	0.065	0.066	0.066	0.067	0.07	0.072	0.068	0.069	0.067	0.067	0.067	0.067	0.068
	01:10:06	0.07	0.069	0.069	0.07	0.099	0.086	0.084	0.078	0.081	0.083	0.093	0.089	0.087	0.101	0.082	0.081	0.078	0.078	0.08	0.09	0.096	0.094	0.07	0.067	0.067	0.065	0.065	0.065	0.064	0.066	0.068	0.07	0.066	0.066	0.065	0.065	0.066	0.066	0.067	0.07	0.072	0.068	0.069	0.067	0.067	0.067	0.067	0.068
	01:15:06	0.07	0.069	0.07	0.07	0.106	0.089	0.087	0.08	0.084	0.086	0.1	0.094	0.092	0.109	0.086	0.084	0.082	0.082	0.083	0.095	0.102	0.1	0.071	0.067	0.067	0.065	0.066	0.065	0.064	0.066	0.068	0.07	0.066	0.066	0.065	0.065	0.066	0.066	0.067	0.07	0.072	0.068	0.069	0.067	0.067	0.068	0.067	0.069
	01:20:06	0.071	0.07	0.07	0.071	0.114	0.093	0.092	0.084	0.089	0.092	0.108	0.1	0.098	0.119	0.091	0.09	0.086	0.086	0.088	0.102	0.111	0.107	0.071	0.068	0.068	0.066	0.066	0.065	0.065	0.066	0.069	0.07	0.067	0.066	0.065	0.066	0.066	0.066	0.067	0.07	0.073	0.069	0.07	0.068	0.068	0.068	0.067	0.07
	01:25:06	0.07	0.07	0.07	0.071	0.124	0.099	0.096	0.087	0.093	0.097	0.117	0.107	0.105	0.132	0.096	0.094	0.091	0.091	0.095	0.112	0.12	0.116	0.071	0.068	0.068	0.065	0.066	0.065	0.065	0.066	0.069	0.07	0.067	0.066	0.065	0.066	0.066	0.066	0.067	0.07	0.073	0.069	0.07	0.068	0.068	0.068	0.067	0.07
	01:30:06	0.071	0.07	0.07	0.071	0.137	0.106	0.103	0.092	0.099	0.105	0.13	0.117	0.114	0.148	0.104	0.102	0.098	0.097	0.101	0.121	0.132	0.128	0.072	0.068	0.068	0.065	0.066	0.065	0.065	0.066	0.068	0.071	0.067	0.067	0.065	0.066	0.066	0.066	0.067	0.07	0.073	0.069	0.071	0.068	0.068	0.068	0.067	0.07
	01:35:06	0.07	0.07	0.07	0.07	0.153	0.114	0.11	0.097	0.105	0.114	0.145	0.129	0.125	0.166	0.112	0.109	0.104	0.104	0.111	0.136	0.149	0.144	0.072	0.068	0.068	0.065	0.066	0.065	0.065	0.066	0.069	0.071	0.067	0.067	0.065	0.066	0.067	0.067	0.067	0.07	0.073	0.069	0.071	0.069	0.068	0.069	0.067	0.07
	01:40:06	0.07	0.07	0.07	0.071	0.172	0.124	0.121	0.104	0.114	0.127	0.164	0.144	0.139	0.183	0.123	0.121	0.116	0.114	0.121	0.151	0.168	0.162	0.072	0.068	0.068	0.066	0.066	0.065	0.065	0.066	0.068	0.071	0.067	0.067	0.066	0.066	0.067	0.067	0.067	0.07	0.074	0.07	0.071	0.069	0.068	0.069	0.068	0.071
	01:45:06	0.071	0.071	0.071	0.071	0.189	0.136	0.133	0.113	0.124	0.141	0.184	0.163	0.156	0.199	0.136	0.134	0.128	0.125	0.134	0.172	0.186	0.179	0.073	0.068	0.068	0.066	0.067	0.066	0.065	0.067	0.069	0.071	0.067	0.067	0.066	0.066	0.067	0.067	0.068	0.071	0.075	0.07	0.072	0.07	0.069	0.069	0.068	0.071
	01:50:06	0.07	0.07	0.07	0.071	0.206	0.151	0.147	0.123	0.137	0.157	0.199	0.178	0.172	0.216	0.153	0.15	0.142	0.138	0.15	0.192	0.199	0.194	0.073	0.068	0.068	0.066	0.067	0.066	0.065	0.067	0.069	0.072	0.067	0.067	0.066	0.066	0.067	0.067	0.068	0.071	0.075	0.07	0.072	0.07	0.069	0.07	0.068	0.072
	01:55:06	0.071	0.07	0.07	0.071	0.232	0.171	0.167	0.137	0.155	0.176	0.212	0.198	0.197	0.239	0.171	0.168	0.161	0.157	0.171	0.206	0.218	0.216	0.073	0.068	0.069	0.066	0.067	0.066	0.066	0.067	0.069	0.072	0.067	0.067	0.066	0.066	0.067	0.068	0.068	0.071	0.076	0.071	0.073	0.071	0.069	0.07	0.068	0.072
	02:00:06	0.07	0.07	0.07	0.071	0.252	0.189	0.184	0.153	0.172	0.197	0.227	0.21	0.213	0.256	0.188	0.184	0.178	0.173	0.185	0.225	0.236	0.231	0.073	0.068	0.068	0.066	0.066	0.066	0.066	0.067	0.069	0.072	0.068	0.067	0.066	0.066	0.067	0.068	0.068	0.071	0.076	0.071	0.074	0.072	0.07	0.07	0.068	0.073
	02:05:06	0.071	0.07	0.07	0.071	0.272	0.214	0.206	0.171	0.192	0.217	0.249	0.225	0.229	0.277	0.207	0.197	0.194	0.193	0.203	0.233	0.253	0.251	0.074	0.069	0.069	0.066	0.067	0.066	0.066	0.068	0.069	0.073	0.068	0.067	0.066	0.066	0.067	0.068	0.068	0.071	0.077	0.072	0.074	0.073	0.071	0.071	0.069	0.074
	02:10:06	0.071	0.071	0.07	0.071	0.302	0.23	0.222	0.191	0.214	0.229	0.269	0.245	0.245	0.29	0.215	0.207	0.208	0.21	0.226	0.256	0.276	0.275	0.075	0.069	0.069	0.067	0.067	0.067	0.067	0.068	0.07	0.074	0.068	0.068	0.067	0.067	0.067	0.069	0.069	0.072	0.078	0.072	0.076	0.073	0.071	0.072	0.069	0.075
	02:15:06	0.074	0.073	0.072	0.073	0.323	0.257	0.24	0.209	0.231	0.261	0.306	0.281	0.279	0.309	0.258	0.257	0.249	0.246	0.253	0.314	0.314	0.302	0.078	0.071	0.071	0.068	0.069	0.068	0.069	0.07	0.072	0.076	0.07	0.069	0.068	0.067	0.069	0.07	0.07	0.073	0.082	0.075	0.078	0.076	0.073	0.074	0.07	0.078
	02:20:06	0.071	0.071	0.07	0.071	0.313	0.271	0.272	0.232	0.254	0.28	0.32	0.303	0.302	0.34	0.27	0.266	0.255	0.253	0.269	0.318	0.328	0.331	0.077	0.07	0.07	0.067	0.068	0.067	0.068	0.069	0.07	0.076	0.069	0.068	0.067	0.067	0.068	0.07	0.07	0.072	0.08	0.073	0.078	0.075	0.072	0.073	0.069	0.077
	02:25:06	0.071	0.071	0.07	0.071	0.335	0.292	0.292	0.249	0.271	0.292	0.332	0.318	0.321	0.352	0.282	0.278	0.275	0.272	0.281	0.325	0.337	0.345	0.078	0.07	0.071	0.068	0.068	0.067	0.069	0.07	0.071	0.077	0.069	0.069	0.067	0.067	0.068	0.071	0.07	0.073	0.081	0.074	0.079	0.077	0.073	0.074	0.069	0.079
	02:30:06	0.071	0.071	0.07	0.071	0.362	0.317	0.314	0.27	0.293	0.315	0.364	0.344	0.344	0.341	0.309	0.303	0.293	0.297	0.305	0.356	0.373	0.382	0.08	0.071	0.071	0.069	0.069	0.068	0.07	0.071	0.071	0.078	0.07	0.069	0.068	0.068	0.069	0.072	0.071	0.073	0.083	0.075	0.081	0.078	0.074	0.075	0.07	0.08
	02:35:06	0.071	0.071	0.07	0.071	0.35	0.333	0.328	0.291	0.313	0.326	0.358	0.355	0.358	0.337	0.326	0.318	0.311	0.313	0.314	0.371	0.348	0.359	0.082	0.072	0.072	0.069	0.069	0.069	0.072	0.072	0.072	0.08	0.071	0.07	0.069	0.068	0.069	0.073	0.072	0.074	0.084	0.076	0.082	0.08	0.075	0.075	0.069	0.082
	02:40:06	0.071	0.071	0.07	0.071	0.354	0.337	0.326	0.296	0.315	0.336	0.347	0.336	0.349	0.341	0.331	0.324	0.32	0.314	0.324	0.365	0.342	0.347	0.084	0.072	0.073	0.07	0.069	0.069	0.073	0.073	0.073	0.082	0.071	0.071	0.07	0.068	0.07	0.075	0.074	0.075	0.086	0.076	0.085	0.082	0.076	0.077	0.07	0.084
	02:45:06	0.071	0.071	0.07	0.071	0.362	0.358	0.354	0.313	0.332	0.339	0.352	0.335	0.348	0.362	0.34	0.335	0.337	0.335	0.334	0.366	0.344	0.348	0.087	0.074	0.074	0.071	0.069	0.07	0.075	0.074	0.074	0.085	0.073	0.072	0.071	0.069	0.071	0.077	0.075	0.076	0.088	0.077	0.087	0.084	0.077	0.077	0.07	0.086
	02:50:06	0.071	0.071	0.07	0.072	0.371	0.358	0.359	0.328	0.361	0.336	0.36	0.337	0.351	0.361	0.338	0.333	0.336	0.344	0.329	0.37	0.356	0.357	0.091	0.075	0.075	0.073	0.07	0.071	0.077	0.076	0.075	0.089	0.074	0.073	0.072	0.07	0.072	0.08	0.077	0.077	0.09	0.078	0.089	0.086	0.078	0.079	0.07	0.088
	02:55:06	0.072	0.071	0.07	0.072	0.37	0.352	0.357	0.361	0.358	0.346	0.382	0.354	0.358	0.359	0.344	0.339	0.341	0.347	0.336	0.387	0.383	0.375	0.096	0.077	0.077	0.074	0.071	0.073	0.08	0.078	0.076	0.093	0.075	0.075	0.074	0.071	0.073	0.082	0.079	0.078	0.093	0.079	0.092	0.088	0.079	0.08	0.071	0.091
	03:00:06	0.072	0.072	0.071	0.072	0.368	0.353	0.36	0.358	0.36	0.348	0.385	0.366	0.365	0.361	0.356	0.35	0.352	0.356	0.35	0.417	0.378	0.377	0.102	0.079	0.079	0.077	0.073	0.075	0.085	0.081	0.078	0.099	0.077	0.076	0.076	0.072	0.074	0.086	0.081	0.08	0.096	0.081	0.096	0.092	0.081	0.082	0.071	0.095
	03:05:06	0.071	0.071	0.07	0.071	0.377	0.368	0.362	0.351	0.358	0.369	0.386	0.372	0.375	0.37	0.385	0.374	0.355	0.356	0.355	0.407	0.375	0.382	0.109	0.081	0.081	0.079	0.074	0.076	0.088	0.084	0.08	0.106	0.079	0.078	0.078	0.073	0.076	0.091	0.085	0.082	0.099	0.081	0.099	0.095	0.081	0.083	0.071	0.097
	03:10:06	0.073	0.073	0.071	0.072	0.374	0.374	0.402	0.359	0.366	0.368	0.391	0.376	0.382	0.374	0.375	0.367	0.382	0.386	0.366	0.417	0.38	0.384	0.121	0.084	0.085	0.082	0.076	0.079	0.095	0.089	0.083	0.116	0.083	0.081	0.081	0.075	0.079	0.097	0.089	0.085	0.104	0.083	0.104	0.099	0.083	0.085	0.072	0.102
	03:15:06	0.075	0.075	0.072	0.074	0.386	0.384	0.372	0.365	0.397	0.367	0.395	0.372	0.377	0.375	0.373	0.369	0.375	0.376	0.367	0.418	0.386	0.386	0.134	0.089	0.089	0.087	0.079	0.083	0.104	0.096	0.088	0.128	0.087	0.086	0.085	0.078	0.082	0.105	0.095	0.089	0.111	0.085	0.11	0.104	0.086	0.087	0.073	0.107
	03:20:06	0.072	0.071	0.071	0.071	0.384	0.384	0.385	0.419	0.384	0.371	0.397	0.38	0.387	0.38	0.371	0.365	0.37	0.376	0.362	0.419	0.386	0.387	0.145	0.092	0.092	0.09	0.08	0.085	0.11	0.1	0.089	0.139	0.089	0.088	0.088	0.079	0.084	0.113	0.1	0.092	0.112	0.085	0.113	0.108	0.086	0.088	0.071	0.11
	03:25:06	0.075	0.075	0.072	0.074	0.387	0.385	0.382	0.375	0.385	0.37	0.401	0.378	0.388	0.378	0.371	0.364	0.372	0.378	0.366	0.426	0.39	0.388	0.163	0.099	0.1	0.098	0.085	0.091	0.124	0.11	0.096	0.157	0.096	0.095	0.095	0.083	0.09	0.126	0.11	0.098	0.122	0.088	0.121	0.115	0.089	0.091	0.073	0.116
	03:30:06	0.076	0.074	0.072	0.074	0.393	0.391	0.389	0.381	0.393	0.379	0.412	0.386	0.395	0.384	0.38	0.374	0.383	0.384	0.375	0.432	0.4	0.395	0.177	0.106	0.107	0.104	0.088	0.097	0.137	0.12	0.102	0.17	0.102	0.1	0.1	0.086	0.095	0.138	0.119	0.103	0.128	0.09	0.127	0.121	0.091	0.094	0.073	0.122
	03:35:06	0.072	0.071	0.071	0.071	0.396	0.39	0.387	0.385	0.392	0.377	0.406	0.383	0.388	0.386	0.38	0.371	0.383	0.384	0.37	0.431	0.401	0.391	0.195	0.113	0.115	0.113	0.092	0.102	0.153	0.132	0.107	0.186	0.109	0.108	0.108	0.09	0.1	0.153	0.13	0.109	0.131	0.09	0.134	0.126	0.092	0.095	0.072	0.127
	03:40:06	0.072	0.071	0.071	0.071	0.403	0.398	0.392	0.388	0.391	0.38	0.412	0.386	0.393	0.396	0.387	0.375	0.381	0.384	0.375	0.435	0.408	0.395	0.209	0.123	0.126	0.124	0.098	0.11	0.164	0.145	0.116	0.197	0.119	0.117	0.118	0.095	0.108	0.166	0.144	0.118	0.139	0.091	0.143	0.134	0.094	0.098	0.072	0.134
	03:45:06	0.072	0.071	0.071	0.071	0.403	0.394	0.394	0.385	0.392	0.382	0.418	0.389	0.397	0.401	0.388	0.375	0.388	0.388	0.379	0.442	0.412	0.399	0.236	0.136	0.14	0.137	0.105	0.121	0.182	0.157	0.127	0.219	0.13	0.129	0.131	0.101	0.118	0.186	0.154	0.128	0.148	0.092	0.152	0.143	0.096	0.101	0.072	0.142
	03:50:06	0.072	0.071	0.071	0.072	0.408	0.395	0.399	0.391	0.4	0.388	0.43	0.4	0.404	0.406	0.391	0.382	0.395	0.392	0.386	0.455	0.423	0.406	0.25	0.149	0.155	0.153	0.114	0.135	0.194	0.175	0.139	0.24	0.144	0.144	0.145	0.11	0.132	0.197	0.172	0.141	0.158	0.095	0.162	0.152	0.098	0.104	0.073	0.15
	03:55:06	0.072	0.071	0.07	0.071	0.421	0.402	0.401	0.396	0.399	0.392	0.433	0.403	0.405	0.417	0.395	0.389	0.399	0.394	0.389	0.446	0.425	0.411	0.282	0.162	0.168	0.165	0.125	0.148	0.21	0.192	0.154	0.26	0.155	0.157	0.157	0.119	0.145	0.213	0.185	0.157	0.169	0.096	0.173	0.162	0.101	0.108	0.072	0.16
	04:00:06	0.073	0.072	0.071	0.072	0.435	0.417	0.409	0.403	0.407	0.4	0.447	0.416	0.417	0.426	0.407	0.396	0.408	0.405	0.401	0.47	0.434	0.424	0.288	0.18	0.189	0.183	0.139	0.163	0.244	0.214	0.168	0.286	0.173	0.173	0.174	0.133	0.158	0.251	0.209	0.17	0.181	0.099	0.184	0.174	0.103	0.112	0.073	0.17
	04:05:06	0.072	0.072	0.071	0.071	0.446	0.413	0.413	0.405	0.406	0.398	0.448	0.414	0.419	0.439	0.405	0.402	0.414	0.404	0.403	0.478	0.445	0.431	0.314	0.195	0.201	0.198	0.151	0.18	0.259	0.232	0.186	0.315	0.189	0.188	0.189	0.146	0.176	0.267	0.224	0.189	0.192	0.1	0.197	0.185	0.106	0.115	0.072	0.18
	04:10:06	0.072	0.072	0.071	0.071	0.462	0.428	0.419	0.407	0.415	0.407	0.458	0.419	0.429	0.45	0.413	0.406	0.414	0.41	0.407	0.486	0.452	0.441	0.329	0.219	0.22	0.217	0.168	0.194	0.282	0.252	0.201	0.33	0.209	0.204	0.205	0.16	0.191	0.286	0.248	0.204	0.2	0.102	0.206	0.196	0.109	0.12	0.073	0.191
	04:15:06	0.073	0.072	0.071	0.072	0.455	0.426	0.425	0.412	0.418	0.411	0.466	0.425	0.433	0.454	0.42	0.411	0.42	0.417	0.413	0.498	0.462	0.447	0.357	0.232	0.239	0.233	0.186	0.209	0.309	0.274	0.222	0.35	0.224	0.22	0.222	0.174	0.204	0.326	0.269	0.228	0.208	0.105	0.213	0.205	0.112	0.124	0.073	0.2
	04:20:06	0.077	0.075	0.073	0.074	0.488	0.449	0.44	0.426	0.437	0.429	0.492	0.445	0.452	0.481	0.437	0.423	0.438	0.432	0.43	0.52	0.484	0.469	0.358	0.267	0.269	0.268	0.205	0.24	0.324	0.31	0.258	0.383	0.257	0.251	0.254	0.197	0.233	0.349	0.303	0.262	0.221	0.11	0.227	0.217	0.118	0.133	0.075	0.21
	04:25:06	0.072	0.072	0.071	0.072	0.49	0.452	0.437	0.428	0.438	0.427	0.491	0.448	0.456	0.48	0.441	0.428	0.441	0.435	0.434	0.525	0.488	0.474	0.353	0.28	0.291	0.286	0.219	0.257	0.342	0.327	0.268	0.361	0.274	0.274	0.274	0.21	0.25	0.36	0.324	0.275	0.228	0.11	0.235	0.226	0.119	0.136	0.073	0.218
	04:30:06	0.072	0.072	0.071	0.072	0.508	0.459	0.445	0.434	0.446	0.436	0.507	0.46	0.471	0.49	0.449	0.437	0.448	0.445	0.445	0.545	0.505	0.485	0.354	0.313	0.312	0.305	0.241	0.279	0.364	0.343	0.306	0.359	0.303	0.299	0.303	0.232	0.274	0.381	0.343	0.311	0.24	0.113	0.245	0.237	0.123	0.142	0.073	0.228
	04:35:06	0.072	0.072	0.071	0.072	0.51	0.468	0.456	0.443	0.452	0.443	0.522	0.468	0.477	0.499	0.457	0.446	0.456	0.454	0.456	0.558	0.517	0.497	0.354	0.332	0.328	0.315	0.265	0.303	0.356	0.374	0.328	0.359	0.324	0.312	0.318	0.251	0.294	0.395	0.376	0.344	0.25	0.116	0.256	0.249	0.127	0.148	0.073	0.238
	04:40:06	0.072	0.071	0.071	0.072	0.534	0.483	0.465	0.451	0.464	0.457	0.531	0.476	0.491	0.517	0.468	0.458	0.472	0.463	0.468	0.574	0.531	0.507	0.373	0.35	0.347	0.34	0.287	0.322	0.353	0.365	0.344	0.362	0.337	0.335	0.336	0.275	0.321	0.387	0.358	0.359	0.262	0.119	0.268	0.26	0.131	0.154	0.073	0.249
	04:45:06	0.074	0.072	0.071	0.072	0.553	0.496	0.476	0.46	0.475	0.465	0.541	0.487	0.501	0.526	0.478	0.469	0.482	0.476	0.478	0.593	0.538	0.516	0.366	0.356	0.38	0.371	0.317	0.344	0.36	0.36	0.362	0.373	0.361	0.352	0.356	0.308	0.336	0.386	0.353	0.367	0.273	0.123	0.281	0.272	0.136	0.162	0.074	0.261
	04:50:06	0.073	0.072	0.071	0.071	0.562	0.504	0.484	0.467	0.483	0.47	0.553	0.492	0.509	0.54	0.489	0.473	0.487	0.49	0.49	0.599	0.554	0.531	0.375	0.35	0.359	0.352	0.33	0.362	0.361	0.355	0.377	0.374	0.353	0.36	0.358	0.323	0.365	0.389	0.352	0.381	0.28	0.126	0.29	0.282	0.14	0.169	0.073	0.27
	04:55:06	0.073	0.072	0.071	0.072	0.577	0.515	0.493	0.475	0.492	0.475	0.557	0.497	0.517	0.554	0.493	0.476	0.491	0.5	0.5	0.609	0.565	0.546	0.378	0.354	0.35	0.349	0.33	0.341	0.369	0.352	0.347	0.379	0.347	0.343	0.35	0.325	0.339	0.407	0.349	0.364	0.29	0.129	0.296	0.291	0.143	0.175	0.074	0.279
	05:00:06	0.073	0.072	0.071	0.072	0.613	0.539	0.51	0.494	0.514	0.494	0.58	0.518	0.54	0.577	0.509	0.499	0.512	0.517	0.521	0.635	0.582	0.565	0.384	0.362	0.357	0.356	0.376	0.351	0.378	0.354	0.364	0.385	0.358	0.348	0.352	0.357	0.346	0.421	0.374	0.377	0.301	0.133	0.307	0.299	0.148	0.184	0.074	0.29
	05:05:06	0.074	0.072	0.071	0.072	0.637	0.56	0.532	0.512	0.53	0.508	0.597	0.53	0.56	0.6	0.523	0.514	0.528	0.526	0.539	0.648	0.6	0.585	0.39	0.367	0.362	0.361	0.364	0.352	0.38	0.38	0.362	0.388	0.357	0.353	0.359	0.36	0.346	0.417	0.372	0.371	0.313	0.138	0.318	0.309	0.154	0.193	0.074	0.3
	05:10:06	0.073	0.071	0.071	0.072	0.623	0.56	0.531	0.517	0.531	0.512	0.607	0.531	0.558	0.595	0.523	0.511	0.521	0.53	0.545	0.656	0.611	0.586	0.386	0.371	0.377	0.375	0.345	0.347	0.383	0.373	0.359	0.383	0.364	0.356	0.365	0.339	0.341	0.406	0.363	0.368	0.32	0.14	0.327	0.314	0.155	0.195	0.074	0.302
	05:15:06	0.073	0.072	0.071	0.072	0.644	0.571	0.542	0.522	0.544	0.521	0.621	0.544	0.571	0.613	0.541	0.519	0.529	0.543	0.56	0.673	0.629	0.607	0.385	0.37	0.377	0.371	0.351	0.356	0.386	0.376	0.369	0.386	0.372	0.37	0.373	0.345	0.362	0.42	0.37	0.379	0.33	0.144	0.339	0.324	0.16	0.2	0.074	0.308
	05:20:06	0.073	0.072	0.071	0.072	0.668	0.592	0.563	0.539	0.565	0.538	0.642	0.563	0.59	0.631	0.559	0.536	0.548	0.562	0.578	0.698	0.647	0.626	0.395	0.378	0.381	0.375	0.36	0.367	0.391	0.385	0.378	0.393	0.375	0.371	0.376	0.354	0.363	0.432	0.38	0.392	0.343	0.149	0.35	0.336	0.167	0.21	0.074	0.321
	05:25:06	0.074	0.072	0.071	0.072	0.696	0.616	0.584	0.558	0.587	0.557	0.661	0.582	0.62	0.658	0.576	0.553	0.566	0.581	0.592	0.713	0.671	0.649	0.404	0.39	0.381	0.377	0.377	0.368	0.396	0.386	0.383	0.397	0.382	0.371	0.377	0.363	0.364	0.438	0.382	0.395	0.354	0.156	0.361	0.347	0.174	0.219	0.074	0.333
	05:30:06	0.074	0.072	0.071	0.072	0.706	0.626	0.589	0.562	0.594	0.56	0.661	0.586	0.626	0.663	0.582	0.551	0.563	0.588	0.599	0.721	0.673	0.656	0.4	0.385	0.384	0.381	0.369	0.363	0.395	0.386	0.378	0.395	0.378	0.379	0.378	0.362	0.364	0.433	0.376	0.391	0.362	0.16	0.37	0.355	0.178	0.224	0.074	0.34
	05:35:06	0.073	0.072	0.071	0.072	0.717	0.639	0.608	0.583	0.605	0.571	0.68	0.595	0.633	0.681	0.599	0.57	0.587	0.599	0.623	0.736	0.694	0.667	0.412	0.393	0.383	0.383	0.375	0.371	0.406	0.387	0.387	0.404	0.387	0.376	0.382	0.372	0.365	0.449	0.384	0.403	0.373	0.164	0.38	0.364	0.182	0.23	0.074	0.348
	05:40:06	0.073	0.072	0.071	0.072	0.729	0.65	0.618	0.591	0.62	0.585	0.69	0.608	0.648	0.693	0.61	0.576	0.595	0.612	0.632	0.751	0.704	0.679	0.414	0.395	0.386	0.385	0.38	0.37	0.409	0.391	0.385	0.408	0.384	0.38	0.381	0.372	0.369	0.448	0.386	0.4	0.383	0.17	0.391	0.374	0.187	0.238	0.074	0.356
	05:45:06	0.074	0.072	0.071	0.072	0.748	0.672	0.644	0.615	0.64	0.6	0.712	0.62	0.663	0.716	0.629	0.596	0.619	0.633	0.658	0.769	0.718	0.696	0.432	0.401	0.391	0.389	0.383	0.377	0.42	0.393	0.391	0.422	0.39	0.38	0.387	0.376	0.369	0.459	0.396	0.4	0.392	0.175	0.399	0.382	0.191	0.245	0.074	0.365
	05:50:06	0.074	0.072	0.071	0.072	0.765	0.684	0.65	0.62	0.656	0.613	0.718	0.638	0.683	0.722	0.633	0.59	0.616	0.644	0.656	0.783	0.727	0.71	0.434	0.403	0.395	0.393	0.383	0.376	0.413	0.396	0.392	0.424	0.393	0.388	0.387	0.374	0.376	0.464	0.395	0.403	0.402	0.18	0.408	0.391	0.197	0.254	0.075	0.373
	05:55:06	0.074	0.073	0.071	0.072	0.776	0.687	0.659	0.635	0.662	0.617	0.735	0.637	0.693	0.733	0.644	0.607	0.632	0.651	0.672	0.797	0.737	0.714	0.438	0.401	0.397	0.396	0.386	0.381	0.422	0.402	0.395	0.431	0.395	0.39	0.39	0.376	0.381	0.472	0.403	0.409	0.42	0.187	0.419	0.402	0.204	0.265	0.075	0.383
	06:00:06	0.073	0.072	0.071	0.071	0.795	0.714	0.685	0.658	0.683	0.637	0.758	0.658	0.707	0.754	0.666	0.626	0.65	0.675	0.693	0.814	0.756	0.734	0.451	0.409	0.398	0.397	0.39	0.385	0.431	0.409	0.4	0.446	0.399	0.388	0.395	0.383	0.379	0.49	0.415	0.411	0.421	0.192	0.426	0.409	0.208	0.273	0.074	0.388
	06:05:06	0.074	0.072	0.071	0.072	0.792	0.726	0.698	0.674	0.694	0.648	0.771	0.669	0.72	0.766	0.677	0.632	0.664	0.688	0.704	0.83	0.769	0.746	0.461	0.414	0.404	0.403	0.392	0.388	0.436	0.417	0.403	0.455	0.404	0.395	0.399	0.387	0.383	0.503	0.421	0.414	0.424	0.199	0.437	0.418	0.214	0.281	0.075	0.395
	06:10:06	0.074	0.071	0.071	0.071	0.822	0.744	0.719	0.691	0.719	0.676	0.793	0.697	0.74	0.78	0.697	0.647	0.677	0.712	0.716	0.851	0.785	0.763	0.479	0.426	0.413	0.41	0.398	0.394	0.447	0.424	0.413	0.473	0.415	0.404	0.408	0.395	0.39	0.514	0.427	0.423	0.431	0.206	0.448	0.429	0.221	0.291	0.075	0.404
	06:15:06	0.073	0.072	0.071	0.072	0.834	0.753	0.728	0.698	0.725	0.681	0.796	0.701	0.75	0.785	0.704	0.657	0.686	0.715	0.724	0.859	0.793	0.77	0.495	0.436	0.422	0.42	0.403	0.401	0.457	0.433	0.424	0.484	0.423	0.413	0.419	0.4	0.396	0.532	0.434	0.434	0.434	0.214	0.458	0.438	0.227	0.298	0.075	0.411
	06:20:06	0.074	0.072	0.071	0.071	0.839	0.769	0.747	0.721	0.742	0.695	0.819	0.716	0.76	0.8	0.724	0.675	0.707	0.736	0.745	0.875	0.805	0.783	0.501	0.436	0.427	0.425	0.404	0.406	0.465	0.439	0.424	0.497	0.424	0.416	0.425	0.402	0.401	0.54	0.443	0.436	0.436	0.221	0.462	0.448	0.232	0.306	0.075	0.418
	06:25:06	0.075	0.073	0.071	0.072	0.845	0.771	0.734	0.714	0.742	0.695	0.813	0.71	0.771	0.804	0.714	0.66	0.696	0.733	0.743	0.88	0.803	0.783	0.499	0.442	0.431	0.428	0.409	0.409	0.468	0.442	0.433	0.493	0.428	0.42	0.423	0.404	0.405	0.56	0.446	0.44	0.44	0.227	0.467	0.455	0.237	0.314	0.075	0.423
	06:30:06	0.074	0.071	0.071	0.072	0.867	0.801	0.776	0.75	0.772	0.728	0.845	0.743	0.788	0.825	0.751	0.695	0.727	0.766	0.76	0.902	0.822	0.805	0.531	0.455	0.445	0.442	0.421	0.42	0.489	0.458	0.436	0.525	0.435	0.432	0.441	0.418	0.418	0.574	0.477	0.443	0.442	0.235	0.471	0.46	0.243	0.323	0.075	0.431
	06:35:06	0.075	0.072	0.071	0.072	0.868	0.806	0.783	0.761	0.785	0.747	0.855	0.753	0.805	0.832	0.76	0.709	0.736	0.776	0.772	0.918	0.832	0.81	0.553	0.47	0.454	0.453	0.431	0.43	0.509	0.473	0.453	0.545	0.451	0.444	0.45	0.426	0.426	0.589	0.477	0.464	0.449	0.242	0.478	0.467	0.25	0.334	0.076	0.44
	06:40:06	0.078	0.075	0.072	0.075	0.89	0.815	0.786	0.767	0.787	0.747	0.858	0.754	0.806	0.847	0.762	0.709	0.742	0.779	0.78	0.924	0.833	0.815	0.556	0.482	0.459	0.46	0.437	0.438	0.513	0.483	0.463	0.549	0.457	0.45	0.458	0.429	0.434	0.601	0.476	0.469	0.455	0.25	0.481	0.469	0.256	0.344	0.077	0.447
	06:45:06	0.075	0.073	0.071	0.072	0.889	0.823	0.797	0.775	0.804	0.763	0.873	0.773	0.82	0.853	0.772	0.716	0.751	0.793	0.786	0.937	0.845	0.829	0.574	0.493	0.465	0.465	0.438	0.438	0.528	0.49	0.469	0.562	0.466	0.452	0.459	0.432	0.437	0.606	0.482	0.473	0.453	0.251	0.48	0.468	0.258	0.348	0.076	0.449
	06:50:06	0.075	0.073	0.071	0.072	0.904	0.832	0.813	0.798	0.814	0.786	0.901	0.797	0.823	0.866	0.791	0.74	0.768	0.804	0.806	0.956	0.856	0.838	0.613	0.52	0.491	0.492	0.46	0.462	0.549	0.518	0.498	0.6	0.489	0.475	0.488	0.447	0.455	0.626	0.5	0.5	0.463	0.262	0.487	0.475	0.266	0.361	0.076	0.461
	06:55:06	0.074	0.072	0.071	0.072	0.918	0.834	0.816	0.803	0.818	0.781	0.907	0.793	0.831	0.872	0.789	0.735	0.773	0.808	0.81	0.967	0.865	0.844	0.608	0.518	0.493	0.495	0.456	0.465	0.552	0.52	0.499	0.602	0.491	0.476	0.493	0.443	0.46	0.635	0.501	0.506	0.464	0.264	0.487	0.475	0.267	0.364	0.076	0.463
	07:00:06	0.075	0.072	0.071	0.072	0.922	0.848	0.828	0.812	0.827	0.795	0.917	0.808	0.842	0.884	0.802	0.751	0.786	0.818	0.816	0.98	0.875	0.855	0.635	0.531	0.502	0.508	0.47	0.479	0.566	0.532	0.514	0.618	0.507	0.491	0.506	0.455	0.47	0.653	0.51	0.526	0.473	0.272	0.493	0.482	0.274	0.374	0.076	0.468
	07:05:06	0.074	0.072	0.071	0.072	0.931	0.852	0.835	0.817	0.828	0.793	0.927	0.804	0.844	0.891	0.806	0.756	0.795	0.822	0.825	0.984	0.884	0.863	0.641	0.537	0.508	0.515	0.476	0.483	0.574	0.537	0.52	0.634	0.51	0.496	0.512	0.461	0.477	0.663	0.512	0.529	0.469	0.273	0.492	0.481	0.274	0.377	0.076	0.466
	07:10:06	0.074	0.072	0.071	0.072	0.943	0.864	0.846	0.828	0.841	0.811	0.942	0.818	0.854	0.901	0.819	0.771	0.807	0.834	0.841	0.999	0.894	0.871	0.658	0.553	0.522	0.528	0.497	0.499	0.591	0.553	0.539	0.653	0.526	0.507	0.525	0.481	0.491	0.681	0.526	0.55	0.475	0.279	0.497	0.485	0.277	0.383	0.076	0.469
	07:15:06	0.076	0.073	0.072	0.073	0.953	0.877	0.859	0.842	0.852	0.821	0.947	0.83	0.866	0.91	0.828	0.779	0.819	0.843	0.849	1.011	0.905	0.882	0.678	0.566	0.53	0.537	0.508	0.509	0.607	0.563	0.552	0.668	0.536	0.514	0.535	0.489	0.497	0.698	0.534	0.558	0.482	0.286	0.505	0.491	0.283	0.392	0.077	0.473
	07:20:06	0.075	0.073	0.072	0.072	0.961	0.884	0.865	0.851	0.862	0.834	0.96	0.841	0.873	0.918	0.836	0.783	0.823	0.854	0.857	1.018	0.911	0.887	0.697	0.58	0.539	0.545	0.517	0.518	0.618	0.576	0.565	0.684	0.549	0.521	0.543	0.497	0.505	0.709	0.54	0.572	0.485	0.291	0.509	0.494	0.288	0.398	0.077	0.474
	07:25:06	0.076	0.073	0.072	0.073	0.972	0.89	0.873	0.859	0.869	0.843	0.97	0.849	0.882	0.924	0.844	0.792	0.83	0.86	0.865	1.027	0.919	0.896	0.703	0.59	0.552	0.559	0.526	0.528	0.634	0.589	0.575	0.698	0.558	0.534	0.556	0.505	0.515	0.72	0.547	0.583	0.487	0.294	0.513	0.498	0.29	0.402	0.077	0.474
	07:30:06	0.075	0.073	0.072	0.073	0.978	0.9	0.886	0.872	0.885	0.857	0.986	0.861	0.892	0.935	0.855	0.806	0.845	0.874	0.879	1.042	0.929	0.909	0.727	0.611	0.569	0.576	0.542	0.544	0.651	0.609	0.596	0.717	0.578	0.549	0.575	0.521	0.53	0.739	0.567	0.607	0.494	0.301	0.519	0.507	0.295	0.411	0.077	0.479
	07:35:06	0.074	0.072	0.071	0.072	0.989	0.907	0.889	0.881	0.892	0.866	0.999	0.869	0.899	0.944	0.864	0.815	0.854	0.883	0.891	1.054	0.934	0.913	0.742	0.629	0.588	0.592	0.557	0.558	0.672	0.627	0.613	0.731	0.594	0.563	0.592	0.529	0.54	0.747	0.574	0.624	0.491	0.306	0.522	0.511	0.298	0.417	0.077	0.481
	07:40:06	0.074	0.072	0.071	0.072	0.994	0.907	0.894	0.884	0.893	0.867	1.001	0.868	0.898	0.948	0.868	0.821	0.859	0.888	0.895	1.061	0.936	0.915	0.753	0.642	0.594	0.602	0.569	0.569	0.68	0.638	0.625	0.744	0.607	0.572	0.602	0.544	0.551	0.767	0.587	0.635	0.494	0.309	0.525	0.514	0.3	0.423	0.077	0.482
	07:45:06	0.075	0.073	0.072	0.073	0.996	0.915	0.902	0.895	0.905	0.889	1.017	0.89	0.91	0.954	0.877	0.831	0.875	0.896	0.906	1.08	0.948	0.926	0.773	0.668	0.624	0.63	0.597	0.597	0.706	0.667	0.655	0.752	0.633	0.603	0.631	0.567	0.573	0.786	0.61	0.656	0.502	0.317	0.532	0.521	0.308	0.434	0.078	0.489
	07:50:06	0.075	0.073	0.072	0.073	0.999	0.916	0.901	0.895	0.903	0.889	1.02	0.89	0.909	0.956	0.878	0.835	0.877	0.898	0.91	1.088	0.949	0.926	0.783	0.679	0.644	0.647	0.617	0.615	0.724	0.682	0.667	0.763	0.646	0.62	0.65	0.589	0.594	0.803	0.633	0.67	0.509	0.323	0.538	0.526	0.312	0.443	0.078	0.494
	07:55:06	0.075	0.073	0.071	0.072	1.01	0.923	0.905	0.899	0.907	0.886	1.023	0.889	0.909	0.966	0.88	0.841	0.883	0.903	0.918	1.092	0.95	0.928	0.796	0.685	0.648	0.652	0.62	0.618	0.733	0.684	0.669	0.777	0.655	0.626	0.655	0.591	0.599	0.814	0.636	0.682	0.508	0.325	0.536	0.526	0.313	0.446	0.078	0.494
	08:00:06	0.076	0.073	0.072	0.073	1.022	0.931	0.917	0.91	0.917	0.899	1.035	0.902	0.918	0.976	0.889	0.85	0.893	0.91	0.925	1.104	0.96	0.936	0.813	0.698	0.662	0.666	0.639	0.637	0.746	0.7	0.685	0.791	0.671	0.641	0.67	0.609	0.611	0.836	0.65	0.697	0.514	0.329	0.541	0.531	0.317	0.453	0.078	0.499
	08:05:06	0.075	0.073	0.071	0.072	1.02	0.935	0.918	0.912	0.925	0.903	1.042	0.907	0.927	0.98	0.894	0.854	0.898	0.919	0.932	1.11	0.963	0.939	0.825	0.71	0.675	0.676	0.65	0.648	0.763	0.713	0.698	0.8	0.683	0.65	0.684	0.621	0.626	0.848	0.659	0.707	0.513	0.33	0.541	0.53	0.318	0.456	0.078	0.498
	08:10:06	0.076	0.074	0.072	0.073	1.039	0.947	0.936	0.927	0.937	0.914	1.052	0.919	0.937	0.992	0.905	0.867	0.913	0.925	0.942	1.121	0.976	0.949	0.828	0.714	0.684	0.685	0.655	0.657	0.765	0.723	0.711	0.816	0.694	0.658	0.692	0.628	0.636	0.871	0.666	0.723	0.522	0.335	0.549	0.537	0.323	0.461	0.079	0.504
	08:15:06	0.075	0.073	0.071	0.072	1.046	0.957	0.939	0.932	0.939	0.918	1.06	0.923	0.941	0.998	0.911	0.875	0.92	0.934	0.954	1.129	0.982	0.954	0.838	0.736	0.705	0.705	0.677	0.676	0.791	0.739	0.725	0.824	0.713	0.679	0.713	0.651	0.651	0.879	0.681	0.733	0.522	0.339	0.553	0.54	0.324	0.462	0.079	0.507
	08:20:06	0.075	0.073	0.071	0.072	1.047	0.959	0.944	0.936	0.947	0.927	1.069	0.932	0.949	1.004	0.917	0.881	0.925	0.942	0.958	1.138	0.986	0.96	0.845	0.75	0.722	0.72	0.695	0.693	0.806	0.752	0.738	0.831	0.723	0.692	0.728	0.666	0.665	0.894	0.691	0.744	0.524	0.342	0.552	0.54	0.326	0.465	0.079	0.508
	08:25:06	0.076	0.074	0.072	0.072	1.053	0.961	0.948	0.94	0.95	0.931	1.074	0.935	0.95	1.01	0.924	0.888	0.934	0.945	0.966	1.147	0.991	0.964	0.85	0.759	0.735	0.737	0.709	0.706	0.816	0.763	0.748	0.836	0.736	0.709	0.743	0.681	0.686	0.917	0.707	0.752	0.532	0.346	0.556	0.544	0.33	0.468	0.08	0.513
	08:30:06	0.075	0.073	0.071	0.072	1.062	0.965	0.956	0.944	0.957	0.936	1.075	0.939	0.955	1.015	0.93	0.893	0.937	0.952	0.971	1.151	0.998	0.971	0.861	0.768	0.736	0.74	0.713	0.713	0.823	0.771	0.755	0.848	0.743	0.712	0.746	0.685	0.689	0.93	0.708	0.768	0.53	0.348	0.559	0.545	0.331	0.468	0.08	0.513
	08:35:06	0.079	0.076	0.073	0.075	1.07	0.982	0.969	0.958	0.969	0.953	1.096	0.956	0.968	1.031	0.947	0.899	0.95	0.965	0.984	1.159	1.011	0.98	0.882	0.786	0.754	0.755	0.735	0.734	0.842	0.787	0.771	0.866	0.765	0.733	0.769	0.71	0.71	0.951	0.726	0.779	0.54	0.355	0.567	0.553	0.337	0.476	0.082	0.521
	08:40:06	0.076	0.074	0.072	0.072	1.075	0.978	0.97	0.958	0.97	0.955	1.1	0.958	0.97	1.033	0.948	0.908	0.956	0.967	0.984	1.168	1.014	0.985	0.89	0.789	0.76	0.762	0.743	0.741	0.848	0.793	0.778	0.869	0.768	0.742	0.775	0.716	0.715	0.959	0.72	0.786	0.541	0.355	0.567	0.555	0.336	0.474	0.081	0.52
	08:45:06	0.077	0.074	0.072	0.073	1.076	0.985	0.974	0.964	0.976	0.964	1.104	0.962	0.974	1.037	0.954	0.918	0.963	0.974	0.99	1.176	1.014	0.986	0.898	0.794	0.777	0.779	0.756	0.753	0.854	0.801	0.783	0.878	0.782	0.758	0.788	0.73	0.737	0.975	0.744	0.794	0.545	0.362	0.573	0.56	0.341	0.48	0.081	0.527
	08:50:06	0.075	0.073	0.071	0.072	1.083	0.99	0.98	0.966	0.978	0.964	1.105	0.963	0.977	1.037	0.957	0.918	0.963	0.978	0.995	1.174	1.019	0.992	0.902	0.8	0.783	0.784	0.763	0.761	0.868	0.802	0.79	0.883	0.784	0.758	0.793	0.738	0.742	0.982	0.748	0.803	0.548	0.362	0.575	0.561	0.34	0.478	0.081	0.526
	08:55:06	0.077	0.074	0.072	0.073	1.083	0.999	0.986	0.975	0.983	0.976	1.118	0.972	0.984	1.044	0.964	0.929	0.977	0.98	1.001	1.186	1.023	0.998	0.913	0.811	0.795	0.798	0.779	0.775	0.886	0.812	0.801	0.891	0.789	0.772	0.806	0.752	0.761	0.998	0.764	0.812	0.557	0.368	0.579	0.566	0.345	0.485	0.082	0.532
	09:00:06	0.077	0.074	0.072	0.073	1.085	1	0.985	0.974	0.988	0.98	1.122	0.974	0.99	1.044	0.966	0.934	0.978	0.986	1.007	1.189	1.025	0.999	0.922	0.815	0.794	0.799	0.783	0.781	0.892	0.821	0.801	0.905	0.796	0.777	0.808	0.757	0.768	1.004	0.769	0.817	0.557	0.369	0.58	0.566	0.344	0.485	0.083	0.531
	09:05:06	0.076	0.073	0.072	0.072	1.088	1.001	0.989	0.977	0.987	0.977	1.119	0.969	0.986	1.047	0.968	0.933	0.978	0.989	1.01	1.193	1.027	1	0.924	0.825	0.805	0.81	0.794	0.786	0.908	0.827	0.81	0.906	0.801	0.78	0.816	0.767	0.774	1.015	0.778	0.819	0.56	0.373	0.582	0.567	0.346	0.487	0.083	0.533
	09:10:06	0.076	0.073	0.071	0.072	1.088	1.007	0.996	0.983	0.998	0.987	1.126	0.978	0.992	1.05	0.975	0.939	0.986	0.998	1.016	1.194	1.031	1.006	0.93	0.835	0.817	0.819	0.8	0.796	0.915	0.834	0.816	0.917	0.809	0.792	0.826	0.776	0.787	1.031	0.786	0.827	0.566	0.376	0.587	0.571	0.348	0.49	0.084	0.536
	09:15:06	0.076	0.073	0.072	0.072	1.092	1.005	0.997	0.986	1	0.99	1.128	0.979	0.993	1.05	0.977	0.941	0.987	0.999	1.022	1.199	1.036	1.01	0.943	0.846	0.827	0.834	0.81	0.808	0.93	0.846	0.828	0.931	0.821	0.804	0.839	0.784	0.801	1.045	0.8	0.837	0.571	0.381	0.593	0.576	0.351	0.495	0.085	0.541
	09:20:06	0.076	0.073	0.071	0.072	1.095	1.016	1.005	0.991	1.007	0.996	1.134	0.984	0.997	1.059	0.986	0.945	0.995	1.006	1.03	1.203	1.042	1.015	0.95	0.852	0.835	0.842	0.819	0.818	0.94	0.852	0.835	0.938	0.828	0.812	0.849	0.793	0.812	1.062	0.811	0.842	0.58	0.387	0.597	0.58	0.356	0.502	0.085	0.546
	09:25:06	0.075	0.073	0.072	0.072	1.098	1.012	1	0.988	1.008	0.992	1.132	0.981	1	1.057	0.982	0.948	0.994	1.009	1.032	1.204	1.042	1.018	0.956	0.851	0.836	0.843	0.819	0.819	0.946	0.854	0.839	0.944	0.83	0.812	0.851	0.794	0.814	1.068	0.809	0.853	0.578	0.389	0.598	0.581	0.357	0.502	0.086	0.545
	09:30:06	0.081	0.078	0.073	0.074	1.092	1.021	1.014	1	1.019	1.01	1.145	0.996	1.009	1.065	0.998	0.955	1.009	1.02	1.04	1.211	1.045	1.019	0.97	0.861	0.842	0.854	0.831	0.826	0.956	0.863	0.849	0.961	0.851	0.827	0.863	0.81	0.827	1.086	0.826	0.865	0.59	0.397	0.604	0.587	0.364	0.512	0.089	0.553
	09:35:06	0.077	0.074	0.072	0.073	1.1	1.021	1.008	0.994	1.015	1.004	1.144	0.991	1.009	1.062	0.991	0.955	1.004	1.014	1.04	1.213	1.044	1.018	0.973	0.867	0.852	0.861	0.841	0.839	0.969	0.871	0.856	0.964	0.851	0.832	0.873	0.815	0.834	1.089	0.829	0.867	0.591	0.397	0.606	0.589	0.365	0.51	0.088	0.551
	09:40:06	0.076	0.073	0.071	0.072	1.104	1.025	1.012	0.999	1.019	1.011	1.146	0.995	1.012	1.066	0.996	0.957	1.006	1.02	1.044	1.211	1.046	1.022	0.976	0.875	0.859	0.87	0.846	0.847	0.977	0.876	0.862	0.969	0.854	0.838	0.879	0.822	0.844	1.098	0.837	0.874	0.593	0.4	0.609	0.591	0.366	0.511	0.089	0.552
	09:45:06	0.081	0.077	0.073	0.075	1.098	1.029	1.021	1.005	1.027	1.017	1.151	1.001	1.018	1.074	1.006	0.965	1.011	1.026	1.049	1.214	1.047	1.024	0.994	0.883	0.863	0.879	0.859	0.855	0.98	0.887	0.871	0.989	0.871	0.851	0.892	0.836	0.857	1.109	0.85	0.887	0.6	0.407	0.619	0.597	0.373	0.521	0.092	0.558
	09:50:06	0.076	0.074	0.071	0.072	1.103	1.022	1.019	1.002	1.023	1.011	1.148	0.995	1.016	1.066	0.999	0.961	1.01	1.024	1.054	1.215	1.049	1.024	0.994	0.884	0.865	0.878	0.861	0.86	0.99	0.89	0.873	0.989	0.869	0.854	0.896	0.838	0.858	1.111	0.851	0.891	0.6	0.404	0.617	0.598	0.373	0.517	0.091	0.555
	09:55:06	0.076	0.074	0.072	0.072	1.104	1.035	1.027	1.011	1.031	1.022	1.155	1	1.019	1.075	1.009	0.972	1.017	1.029	1.058	1.219	1.052	1.029	1.002	0.896	0.879	0.893	0.873	0.872	1.005	0.898	0.884	0.995	0.876	0.862	0.908	0.85	0.872	1.121	0.861	0.899	0.607	0.406	0.624	0.604	0.377	0.522	0.092	0.559
	10:00:06	0.076	0.074	0.072	0.072	1.108	1.027	1.025	1.012	1.029	1.023	1.151	0.999	1.017	1.071	1.01	0.972	1.02	1.03	1.051	1.223	1.05	1.032	1.01	0.903	0.887	0.901	0.882	0.881	1.016	0.905	0.89	1.004	0.883	0.869	0.917	0.858	0.881	1.129	0.868	0.902	0.612	0.407	0.628	0.608	0.381	0.525	0.094	0.563
	10:05:06	0.075	0.073	0.072	0.072	1.106	1.029	1.021	1.007	1.028	1.017	1.15	0.997	1.019	1.074	1.006	0.974	1.018	1.03	1.058	1.22	1.05	1.031	1.015	0.904	0.89	0.904	0.883	0.883	1.019	0.907	0.891	1.007	0.885	0.873	0.92	0.861	0.885	1.132	0.869	0.908	0.615	0.406	0.63	0.609	0.384	0.527	0.095	0.564
	10:10:06	0.077	0.075	0.072	0.073	1.097	1.035	1.029	1.019	1.037	1.035	1.16	1.007	1.026	1.079	1.021	0.982	1.028	1.038	1.064	1.225	1.054	1.036	1.029	0.912	0.896	0.914	0.897	0.893	1.024	0.92	0.904	1.02	0.901	0.887	0.934	0.876	0.9	1.144	0.885	0.919	0.627	0.41	0.641	0.616	0.39	0.533	0.097	0.569
	10:15:06	0.082	0.078	0.073	0.074	1.096	1.034	1.029	1.016	1.034	1.034	1.158	1.005	1.022	1.078	1.021	0.985	1.034	1.037	1.064	1.226	1.043	1.028	1.028	0.918	0.902	0.916	0.897	0.899	1.039	0.92	0.902	1.017	0.896	0.889	0.937	0.878	0.904	1.156	0.89	0.917	0.643	0.415	0.646	0.621	0.397	0.541	0.1	0.578
	10:20:06	0.077	0.075	0.072	0.073	1.091	1.033	1.032	1.019	1.039	1.038	1.158	1.007	1.022	1.078	1.022	0.988	1.037	1.04	1.069	1.227	1.048	1.034	1.032	0.922	0.903	0.922	0.904	0.906	1.04	0.928	0.907	1.022	0.903	0.893	0.941	0.885	0.91	1.164	0.894	0.923	0.642	0.412	0.647	0.623	0.398	0.54	0.101	0.578
	10:25:06	0.077	0.075	0.072	0.073	1.095	1.035	1.027	1.014	1.041	1.031	1.156	1.005	1.027	1.074	1.016	0.984	1.029	1.043	1.069	1.228	1.051	1.038	1.04	0.925	0.909	0.924	0.909	0.91	1.045	0.93	0.916	1.027	0.907	0.899	0.946	0.891	0.914	1.166	0.903	0.93	0.643	0.412	0.652	0.628	0.397	0.54	0.103	0.576
	10:30:06	0.076	0.074	0.071	0.072	1.091	1.029	1.029	1.016	1.041	1.032	1.156	1.005	1.027	1.072	1.014	0.982	1.027	1.043	1.068	1.226	1.05	1.036	1.046	0.925	0.914	0.926	0.907	0.911	1.05	0.932	0.918	1.031	0.909	0.9	0.949	0.892	0.919	1.165	0.907	0.936	0.64	0.411	0.65	0.629	0.395	0.539	0.105	0.575
	10:35:06	0.076	0.074	0.071	0.072	1.083	1.025	1.03	1.023	1.043	1.041	1.159	1.008	1.026	1.075	1.022	0.987	1.035	1.045	1.069	1.224	1.051	1.035	1.048	0.931	0.922	0.935	0.917	0.919	1.061	0.94	0.926	1.042	0.921	0.909	0.957	0.903	0.928	1.175	0.916	0.939	0.646	0.414	0.658	0.634	0.397	0.544	0.107	0.576
	10:40:06	0.077	0.075	0.072	0.073	1.088	1.026	1.03	1.021	1.035	1.04	1.16	1.002	1.022	1.075	1.024	0.996	1.041	1.041	1.075	1.231	1.045	1.031	1.053	0.942	0.93	0.945	0.926	0.93	1.072	0.952	0.93	1.047	0.924	0.92	0.969	0.911	0.935	1.189	0.925	0.937	0.655	0.419	0.667	0.641	0.399	0.549	0.11	0.582
	10:45:06	0.075	0.074	0.071	0.072	1.09	1.032	1.025	1.016	1.041	1.036	1.158	1.001	1.025	1.078	1.022	0.992	1.039	1.047	1.076	1.226	1.049	1.04	1.053	0.946	0.935	0.948	0.933	0.935	1.078	0.954	0.939	1.049	0.93	0.921	0.971	0.917	0.943	1.188	0.931	0.947	0.654	0.42	0.67	0.644	0.399	0.55	0.112	0.582
	10:50:06	0.078	0.075	0.072	0.073	1.082	1.028	1.029	1.021	1.043	1.042	1.162	1.004	1.026	1.072	1.02	0.994	1.041	1.048	1.077	1.227	1.049	1.04	1.057	0.946	0.939	0.953	0.934	0.937	1.082	0.958	0.94	1.057	0.933	0.928	0.977	0.918	0.947	1.194	0.929	0.954	0.656	0.421	0.672	0.646	0.4	0.554	0.116	0.585
	10:55:06	0.077	0.075	0.072	0.072	1.088	1.032	1.031	1.019	1.046	1.043	1.165	1.007	1.034	1.079	1.024	0.996	1.04	1.05	1.081	1.23	1.051	1.041	1.065	0.951	0.948	0.956	0.94	0.941	1.087	0.963	0.944	1.07	0.943	0.939	0.988	0.926	0.957	1.191	0.936	0.959	0.657	0.421	0.674	0.649	0.4	0.555	0.119	0.586
	11:00:06	0.077	0.075	0.072	0.072	1.095	1.042	1.036	1.023	1.052	1.042	1.162	1.009	1.032	1.085	1.031	1.001	1.046	1.055	1.083	1.227	1.052	1.047	1.068	0.965	0.959	0.968	0.95	0.954	1.098	0.974	0.956	1.074	0.953	0.948	0.995	0.935	0.967	1.193	0.945	0.967	0.664	0.423	0.68	0.656	0.402	0.557	0.122	0.59
	11:05:06	0.078	0.076	0.072	0.073	1.091	1.044	1.043	1.033	1.053	1.053	1.169	1.015	1.04	1.09	1.043	1.006	1.05	1.06	1.087	1.232	1.05	1.046	1.075	0.972	0.966	0.977	0.957	0.96	1.106	0.979	0.961	1.085	0.967	0.957	1.003	0.945	0.976	1.2	0.95	0.977	0.67	0.426	0.684	0.66	0.404	0.562	0.126	0.59
	11:10:06	0.078	0.076	0.072	0.073	1.088	1.04	1.036	1.028	1.048	1.051	1.166	1.011	1.03	1.085	1.038	1.009	1.049	1.053	1.084	1.226	1.043	1.039	1.073	0.974	0.962	0.98	0.958	0.962	1.112	0.979	0.964	1.077	0.967	0.96	1.006	0.945	0.982	1.205	0.956	0.971	0.676	0.429	0.692	0.668	0.407	0.565	0.13	0.599
	11:15:06	0.078	0.075	0.072	0.072	1.085	1.042	1.034	1.027	1.044	1.051	1.166	1.011	1.028	1.087	1.037	1.006	1.05	1.053	1.083	1.221	1.044	1.041	1.07	0.979	0.971	0.984	0.961	0.967	1.12	0.98	0.963	1.075	0.966	0.963	1.007	0.948	0.985	1.21	0.956	0.973	0.684	0.433	0.694	0.671	0.41	0.571	0.135	0.602
	11:20:06	0.076	0.074	0.071	0.072	1.085	1.037	1.027	1.018	1.041	1.041	1.161	1.005	1.028	1.077	1.025	0.999	1.042	1.051	1.079	1.219	1.043	1.044	1.071	0.97	0.964	0.98	0.965	0.97	1.112	0.982	0.969	1.077	0.97	0.957	1.004	0.952	0.986	1.211	0.958	0.984	0.669	0.432	0.692	0.669	0.409	0.567	0.14	0.598
	11:25:06	0.077	0.076	0.072	0.072	1.089	1.043	1.037	1.026	1.047	1.053	1.171	1.013	1.037	1.085	1.038	1.002	1.049	1.057	1.085	1.223	1.046	1.048	1.079	0.98	0.969	0.983	0.971	0.976	1.119	0.985	0.975	1.094	0.986	0.971	1.011	0.964	0.994	1.214	0.964	0.996	0.673	0.434	0.696	0.672	0.411	0.571	0.145	0.596
	11:30:06	0.078	0.075	0.073	0.073	1.084	1.041	1.041	1.031	1.049	1.058	1.171	1.016	1.034	1.085	1.039	1.01	1.054	1.055	1.092	1.221	1.046	1.047	1.079	0.985	0.979	0.994	0.977	0.983	1.125	0.992	0.977	1.083	0.983	0.972	1.019	0.964	1.002	1.217	0.97	0.993	0.686	0.437	0.703	0.678	0.414	0.573	0.151	0.6
	11:35:06	0.076	0.074	0.072	0.072	1.092	1.049	1.029	1.02	1.04	1.047	1.165	1.01	1.031	1.083	1.034	1.007	1.049	1.057	1.089	1.218	1.048	1.052	1.081	0.985	0.977	0.991	0.982	0.987	1.124	0.994	0.985	1.092	0.988	0.973	1.017	0.969	1.007	1.219	0.976	0.996	0.684	0.438	0.702	0.679	0.414	0.573	0.156	0.605
	11:40:06	0.077	0.074	0.072	0.072	1.095	1.046	1.033	1.024	1.044	1.05	1.165	1.012	1.031	1.084	1.033	1.005	1.049	1.054	1.082	1.217	1.04	1.044	1.077	0.985	0.978	0.991	0.983	0.984	1.127	0.992	0.982	1.087	0.985	0.971	1.017	0.97	1.009	1.219	0.971	0.994	0.681	0.44	0.704	0.681	0.415	0.575	0.16	0.605
	11:45:06	0.076	0.074	0.072	0.072	1.1	1.054	1.039	1.027	1.048	1.052	1.168	1.016	1.035	1.091	1.041	1.008	1.057	1.06	1.09	1.216	1.048	1.053	1.078	0.99	0.985	0.997	0.987	0.992	1.129	0.999	0.989	1.091	0.989	0.978	1.023	0.977	1.017	1.22	0.981	0.999	0.688	0.442	0.706	0.684	0.417	0.577	0.166	0.608
	11:50:06	0.076	0.074	0.072	0.072	1.094	1.047	1.04	1.032	1.047	1.058	1.17	1.018	1.035	1.089	1.041	1.014	1.059	1.059	1.089	1.211	1.046	1.049	1.075	0.992	0.985	0.999	0.988	0.994	1.135	0.997	0.986	1.088	0.993	0.982	1.023	0.98	1.02	1.225	0.981	0.995	0.7	0.447	0.715	0.692	0.42	0.582	0.171	0.613
	11:55:06	0.076	0.075	0.072	0.071	1.086	1.052	1.043	1.033	1.056	1.058	1.169	1.023	1.044	1.088	1.041	1.006	1.059	1.063	1.093	1.211	1.051	1.058	1.077	0.991	0.988	0.999	0.992	0.998	1.135	0.999	0.993	1.09	0.996	0.985	1.027	0.985	1.026	1.225	0.98	1.007	0.69	0.446	0.709	0.687	0.419	0.58	0.177	0.608
	12:00:06	0.076	0.074	0.072	0.071	1.092	1.048	1.036	1.032	1.046	1.058	1.168	1.017	1.036	1.092	1.042	1.013	1.06	1.058	1.088	1.205	1.045	1.048	1.076	0.993	0.989	0.998	0.992	0.999	1.14	0.997	0.988	1.087	0.996	0.983	1.029	0.984	1.026	1.228	0.982	0.997	0.704	0.451	0.72	0.698	0.423	0.585	0.184	0.62
[truncated: 136 more columns]
